# Supplementary material for: Integrative Genomic Profiling Identifies MLPH as a Candidate Gene in Prostate Cancer
Source: Research Square preprint supplement (doi:10.21203/rs.3.rs-7662167/v1), 2025-10-30
Supplement: Supplementary file 1 [file 664506b73e181f0f3b7d1393.xlsx]

## Sheet: Table S1
Table S1. The results of TWAS analyses in cross-tissue
gene_id	gene	CHR	FDR	start_hg18	end_hg18
ENSG00000202248	RNA5SP85	2	1.5e-14	11701787	11701905
ENSG00000138079	SLC3A1	2	1.47e-10	44502599	44548633
ENSG00000249264	EEF1A1P9	4	3.45e-10	106405855	106407237
ENSG00000229920	RPS4XP5	2	5.66e-10	63869589	63871172
ENSG00000175387	SMAD2	18	6.28e-10	45357922	45457515
ENSG00000162882	HAAO	2	6.43e-10	42994229	43019733
ENSG00000223374	AC005104.3	2	8.16e-10	242290755	242292519
ENSG00000226756	AC007365.3	2	1.12e-09	64871746	64873832
ENSG00000229221	HNRNPA1P66	2	1.51e-09	63978831	63979764
ENSG00000003400	CASP10	2	1.92e-09	202047604	202094129
ENSG00000014641	MDH1	2	1.92e-09	63815743	63834331
ENSG00000100266	PACSIN2	22	1.92e-09	43231418	43411151
ENSG00000100290	BIK	22	1.92e-09	43506754	43525718
ENSG00000100294	MCAT	22	1.92e-09	43528212	43539400
ENSG00000101751	POLI	18	1.92e-09	51795774	51847636
ENSG00000115484	CCT4	2	1.92e-09	62095224	62115939
ENSG00000115486	GGCX	2	1.92e-09	85771846	85788670
ENSG00000115504	EHBP1	2	1.92e-09	62900986	63273622
ENSG00000115507	OTX1	2	1.92e-09	63277192	63284971
ENSG00000115648	MLPH	2	1.92e-09	238394071	238463961
ENSG00000115761	NOL10	2	1.92e-09	10710892	10830101
ENSG00000118640	VAMP8	2	1.92e-09	85788685	85809154
ENSG00000138696	BMPR1B	4	1.92e-09	95679119	96079599
ENSG00000138777	PPA2	4	1.92e-09	106290234	106395238
ENSG00000143882	ATP6V1C2	2	1.92e-09	10861775	10925236
ENSG00000143951	WDPCP	2	1.92e-09	63348518	64054977
ENSG00000152256	PDK1	2	1.92e-09	173420101	173489823
ENSG00000152284	TCF7L1	2	1.92e-09	85360533	85537511
ENSG00000152518	ZFP36L2	2	1.92e-09	43449541	43453748
ENSG00000155749	ALS2CR12	2	1.92e-09	202152994	202222121
ENSG00000162881	OXER1	2	1.92e-09	42989642	42991401
ENSG00000163106	HPGDS	4	1.92e-09	95219686	95264027
ENSG00000163738	MTHFD2L	4	1.92e-09	74979891	75168816
ENSG00000163739	CXCL1	4	1.92e-09	74735110	74736959
ENSG00000168385	SEPT2	2	1.92e-09	242254515	242293442
ENSG00000168769	TET2	4	1.92e-09	106067032	106200973
ENSG00000168883	USP39	2	1.92e-09	85829979	85876403
ENSG00000168890	TMEM150A	2	1.92e-09	85825671	85830319
ENSG00000168894	RNF181	2	1.92e-09	85822848	85824736
ENSG00000169006	NTSR2	2	1.92e-09	11798304	11810290
ENSG00000169764	UGP2	2	1.92e-09	64068074	64118696
ENSG00000170340	B3GNT2	2	1.92e-09	62423248	62451866
ENSG00000184058	TBX1	22	1.92e-09	19744226	19771116
ENSG00000223658	AC011242.6	2	1.92e-09	43902292	43903461
ENSG00000223825	DAZAP2P1	2	1.92e-09	203066103	203066609
ENSG00000223843	EFCAB6-AS1	22	1.92e-09	43911997	43932747
ENSG00000225205	AC093818.1	2	1.92e-09	173345568	173421324
ENSG00000228363	AC015971.2	2	1.92e-09	86789193	86845889
ENSG00000228872	AC096664.2	2	1.92e-09	63944256	63945033
ENSG00000229695	AC011242.5	2	1.92e-09	43907604	43908761
ENSG00000230587	AC093609.1	2	1.92e-09	43324884	43329829
ENSG00000236699	ARHGEF38	4	1.92e-09	106473777	106629250
ENSG00000143921	ABCG8	2	2.41e-09	44066103	44105605
ENSG00000196208	GREB1	2	2.66e-09	11674242	11782914
ENSG00000230044	AC110754.3	2	6.35e-09	11805495	11806095
ENSG00000229915	AC016999.2	2	1.15e-08	239335718	239336370
ENSG00000182585	EPGN	4	1.37e-08	75174190	75181024
ENSG00000138395	CDK15	2	1.6e-08	202655184	202760273
ENSG00000169435	RASSF6	4	2.42e-08	74437267	74486348
ENSG00000249599	RP11-168E14.1	4	3.28e-08	95664951	95678684
ENSG00000119862	LGALSL	2	3.35e-08	64681103	64688515
ENSG00000163736	PPBP	4	3.41e-08	74852755	74853914
ENSG00000145348	TBCK	4	4.51e-08	106962756	107242652
ENSG00000155754	ALS2CR11	2	4.7e-08	202352148	202483901
ENSG00000082146	STRADB	2	7.01e-08	202252581	202345569
ENSG00000091409	ITGA6	2	7.52e-08	173292082	173371181
ENSG00000223553	SMPD4P1	22	9.41e-08	20956882	21011201
ENSG00000223935	AC008074.3	2	9.41e-08	64622354	64680932
ENSG00000145391	SETD7	4	1.01e-07	140417095	140527853
ENSG00000064012	CASP8	2	1.18e-07	202098166	202152434
ENSG00000184470	TXNRD2	22	1.36e-07	19863040	19929341
ENSG00000115993	TRAK2	2	1.42e-07	202241930	202316302
ENSG00000226972	AC013717.3	2	1.75e-07	44497760	44498245
ENSG00000213148	AC073465.1	2	1.83e-07	174296077	174296540
ENSG00000155744	FAM126B	2	1.85e-07	201838441	201936394
ENSG00000226491	FTOP1	2	2.02e-07	43024365	43025852
ENSG00000091436	MLTK	2	2.29e-07	173940163	174132738
ENSG00000119013	NDUFB3	2	2.43e-07	201936156	201950473
ENSG00000077380	DYNC1I2	2	2.46e-07	172543919	172604930
ENSG00000100387	RBX1	22	2.47e-07	41347351	41369313
ENSG00000179833	SERTAD2	2	2.47e-07	64858755	64978139
ENSG00000163535	SGOL2	2	2.56e-07	201374731	201448505
ENSG00000100341	PNPLA5	22	3.78e-07	44275558	44287893
ENSG00000198612	COPS8	2	3.78e-07	237993955	238009109
ENSG00000152527	PLEKHH2	2	4.29e-07	43864412	43995126
ENSG00000176635	HORMAD2	22	4.29e-07	30476163	30573064
ENSG00000132466	ANKRD17	4	4.62e-07	73939093	74124515
ENSG00000123610	TNFAIP6	2	7.07e-07	152214106	152236560
ENSG00000168743	NPNT	4	7.07e-07	106815932	106925184
ENSG00000231609	AC009501.4	2	7.07e-07	63271057	63275775
ENSG00000138075	ABCG5	2	7.92e-07	44039611	44066004
ENSG00000142330	CAPN10	2	8.01e-07	241526133	241557122
ENSG00000115523	GNLY	2	8.67e-07	85912298	85925977
ENSG00000155729	KCTD18	2	1.02e-06	201353675	201384507
ENSG00000166510	CCDC68	18	1.05e-06	52568740	52626739
ENSG00000115758	ODC1	2	1.16e-06	10580094	10588630
ENSG00000003402	CFLAR	2	1.17e-06	201980827	202041410
ENSG00000116030	SUMO1	2	1.33e-06	203070903	203103331
ENSG00000115677	HDLBP	2	1.45e-06	242166679	242256476
ENSG00000100300	TSPO	22	1.69e-06	43547520	43559248
ENSG00000162878	PKDCC	2	1.97e-06	42275160	42285668
ENSG00000196290	NIF3L1	2	2.1e-06	201754050	201768655
ENSG00000213090	AC007256.5	2	2.27e-06	202275267	202278031
ENSG00000138032	PPM1B	2	2.3e-06	44395108	44471523
ENSG00000223725	AC007879.5	2	2.46e-06	208104588	208394519
ENSG00000178458	H3F3AP6	4	2.77e-06	140619298	140619708
ENSG00000248641	HMGA1P2	4	3.37e-06	73964539	73964862
ENSG00000215023	AC114730.5	2	3.99e-06	242740331	242741322
ENSG00000155755	TMEM237	2	5.44e-06	202484907	202508293
ENSG00000168393	DTYMK	2	5.47e-06	242615157	242626406
ENSG00000057935	MTA3	2	6.08e-06	42721709	42984087
ENSG00000130294	KIF1A	2	6.28e-06	241653181	241759725
ENSG00000176771	NCKAP5	2	6.28e-06	133429374	134326034
ENSG00000100325	ASCC2	22	6.73e-06	30184597	30234271
ENSG00000214125	RP3-412A9.15	22	7.2e-06	31551952	31552633
ENSG00000202058	RN7SKP80	22	7.57e-06	42961054	42961336
ENSG00000185133	INPP5J	22	9.89e-06	31518717	31530682

## Sheet: Table S2
Table S2. Overlapping genes between cross-tissue and single-tissue TWAS results
Gene symbol	CHR	Tissues
ABCG5	2	Skin_Not_Sun_Exposed_Suprapubic
ABCG8	2	Uterus
AC005104.3	2	Adipose_Subcutaneous, Adipose_Visceral_Omentum, Adrenal_Gland, Artery_Aorta, Artery_Coronary, Artery_Tibial, Brain_Cerebellar_Hemisphere, Brain_Cerebellum, Brain_Hypothalamus, Brain_Nucleus_accumbens_basal_ganglia, Breast_Mammary_Tissue, Cells_Cultured_fibroblasts, Colon_Sigmoid, Colon_Transverse, Esophagus_Gastroesophageal_Junction, Esophagus_Mucosa, Esophagus_Muscularis, Heart_Left_Ventricle, K…
AC007256.5	2	Artery_Tibial, Pituitary, Skin_Sun_Exposed_Lower_leg
AC007365.3	2	Esophagus_Muscularis
AC007879.5	2	Thyroid
AC009501.4	2	Adipose_Subcutaneous, Adipose_Visceral_Omentum, Adrenal_Gland, Artery_Coronary, Artery_Tibial, Brain_Anterior_cingulate_cortex_BA24, Brain_Caudate_basal_ganglia, Brain_Cortex, Brain_Hippocampus, Brain_Nucleus_accumbens_basal_ganglia, Brain_Putamen_basal_ganglia, Brain_Spinal_cord_cervical_c-1, Cells_Cultured_fibroblasts, Cells_EBV-transformed_lymphocytes, Esophagus_Gastroesophageal_Junction, Esop…
AC093609.1	2	Adipose_Subcutaneous, Adipose_Visceral_Omentum, Artery_Aorta, Brain_Anterior_cingulate_cortex_BA24, Brain_Nucleus_accumbens_basal_ganglia, Brain_Spinal_cord_cervical_c-1, Esophagus_Muscularis, Heart_Left_Ventricle, Nerve_Tibial, Uterus
AC093818.1	2	Artery_Aorta, Breast_Mammary_Tissue, Ovary, Pituitary, Skin_Not_Sun_Exposed_Suprapubic, Skin_Sun_Exposed_Lower_leg, Testis
ALS2CR11	2	Breast_Mammary_Tissue, Cells_Cultured_fibroblasts, Esophagus_Muscularis, Pituitary
ALS2CR12	2	Adipose_Subcutaneous, Adipose_Visceral_Omentum, Adrenal_Gland, Artery_Aorta, Artery_Coronary, Artery_Tibial, Brain_Amygdala, Brain_Anterior_cingulate_cortex_BA24, Brain_Caudate_basal_ganglia, Brain_Cerebellar_Hemisphere, Brain_Cerebellum, Brain_Cortex, Brain_Frontal_Cortex_BA9, Brain_Hypothalamus, Brain_Nucleus_accumbens_basal_ganglia, Brain_Putamen_basal_ganglia, Brain_Spinal_cord_cervical_c-1, …
ANKRD17	4	Artery_Coronary, Brain_Hippocampus, Esophagus_Muscularis, Muscle_Skeletal, Pancreas
ARHGEF38	4	Colon_Transverse, Lung, Pituitary, Small_Intestine_Terminal_Ileum, Stomach
ASCC2	22	Brain_Putamen_basal_ganglia, Cells_EBV-transformed_lymphocytes
ATP6V1C2	2	Artery_Aorta, Brain_Anterior_cingulate_cortex_BA24, Brain_Caudate_basal_ganglia, Brain_Cortex, Brain_Frontal_Cortex_BA9, Brain_Nucleus_accumbens_basal_ganglia, Brain_Putamen_basal_ganglia, Brain_Spinal_cord_cervical_c-1, Esophagus_Muscularis, Prostate, Skin_Sun_Exposed_Lower_leg, Testis
B3GNT2	2	Brain_Nucleus_accumbens_basal_ganglia, Brain_Substantia_nigra
BIK	22	Brain_Anterior_cingulate_cortex_BA24, Brain_Caudate_basal_ganglia, Brain_Cerebellar_Hemisphere, Brain_Cerebellum, Brain_Frontal_Cortex_BA9, Brain_Spinal_cord_cervical_c-1, Breast_Mammary_Tissue, Esophagus_Muscularis, Lung, Pancreas, Skin_Not_Sun_Exposed_Suprapubic, Skin_Sun_Exposed_Lower_leg, Thyroid
BMPR1B	4	Artery_Aorta, Prostate
CASP10	2	Artery_Aorta, Brain_Putamen_basal_ganglia, Esophagus_Mucosa, Kidney_Cortex, Lung, Muscle_Skeletal, Nerve_Tibial, Pancreas, Prostate, Skin_Not_Sun_Exposed_Suprapubic, Stomach, Vagina
CASP8	2	Adipose_Subcutaneous, Adipose_Visceral_Omentum, Adrenal_Gland, Brain_Amygdala, Brain_Anterior_cingulate_cortex_BA24, Brain_Caudate_basal_ganglia, Brain_Cerebellar_Hemisphere, Brain_Cerebellum, Brain_Cortex, Brain_Frontal_Cortex_BA9, Brain_Hippocampus, Brain_Hypothalamus, Brain_Nucleus_accumbens_basal_ganglia, Brain_Putamen_basal_ganglia, Brain_Spinal_cord_cervical_c-1, Breast_Mammary_Tissue, Cell…
CFLAR	2	Adipose_Visceral_Omentum, Artery_Aorta, Brain_Amygdala, Brain_Cerebellum, Esophagus_Muscularis, Nerve_Tibial, Vagina
COPS8	2	Kidney_Cortex, Minor_Salivary_Gland
CXCL1	4	Brain_Frontal_Cortex_BA9, Thyroid
DTYMK	2	Colon_Transverse, Minor_Salivary_Gland, Small_Intestine_Terminal_Ileum, Uterus
EEF1A1P9	4	Adipose_Visceral_Omentum, Brain_Cerebellar_Hemisphere, Brain_Cerebellum, Brain_Hypothalamus, Brain_Substantia_nigra, Breast_Mammary_Tissue, Cells_Cultured_fibroblasts, Minor_Salivary_Gland, Ovary, Pancreas, Small_Intestine_Terminal_Ileum, Testis, Thyroid, Vagina, Whole_Blood
EFCAB6-AS1	22	Brain_Amygdala
EHBP1	2	Adipose_Subcutaneous, Artery_Aorta, Artery_Coronary, Artery_Tibial, Brain_Amygdala, Brain_Anterior_cingulate_cortex_BA24, Brain_Cerebellum, Brain_Frontal_Cortex_BA9, Brain_Hypothalamus, Brain_Nucleus_accumbens_basal_ganglia, Brain_Putamen_basal_ganglia, Brain_Spinal_cord_cervical_c-1, Breast_Mammary_Tissue, Cells_Cultured_fibroblasts, Colon_Sigmoid, Esophagus_Gastroesophageal_Junction, Esophagus_…
FAM126B	2	Brain_Amygdala, Brain_Putamen_basal_ganglia, Esophagus_Mucosa, Liver
FTOP1	2	Adipose_Subcutaneous, Adipose_Visceral_Omentum, Artery_Aorta, Artery_Tibial, Brain_Anterior_cingulate_cortex_BA24, Brain_Hippocampus, Brain_Nucleus_accumbens_basal_ganglia, Brain_Putamen_basal_ganglia, Brain_Substantia_nigra, Colon_Sigmoid, Esophagus_Muscularis, Lung, Muscle_Skeletal, Skin_Not_Sun_Exposed_Suprapubic, Spleen, Testis, Thyroid
GGCX	2	Adipose_Subcutaneous, Adipose_Visceral_Omentum, Adrenal_Gland, Artery_Aorta, Artery_Coronary, Artery_Tibial, Brain_Amygdala, Brain_Anterior_cingulate_cortex_BA24, Brain_Caudate_basal_ganglia, Brain_Cerebellar_Hemisphere, Brain_Cerebellum, Brain_Cortex, Brain_Frontal_Cortex_BA9, Brain_Hippocampus, Brain_Hypothalamus, Brain_Nucleus_accumbens_basal_ganglia, Brain_Putamen_basal_ganglia, Brain_Spinal_…
HAAO	2	Adipose_Visceral_Omentum, Adrenal_Gland, Brain_Anterior_cingulate_cortex_BA24, Brain_Caudate_basal_ganglia, Brain_Frontal_Cortex_BA9, Brain_Hippocampus, Brain_Hypothalamus, Brain_Nucleus_accumbens_basal_ganglia, Brain_Putamen_basal_ganglia, Brain_Substantia_nigra, Cells_Cultured_fibroblasts, Colon_Sigmoid, Esophagus_Mucosa, Lung, Nerve_Tibial, Ovary, Pancreas, Pituitary, Uterus, Whole_Blood
HDLBP	2	Adipose_Visceral_Omentum, Adrenal_Gland, Artery_Aorta, Artery_Coronary, Artery_Tibial, Brain_Anterior_cingulate_cortex_BA24, Brain_Cerebellar_Hemisphere, Brain_Cerebellum, Brain_Cortex, Cells_EBV-transformed_lymphocytes, Colon_Sigmoid, Colon_Transverse, Esophagus_Mucosa, Esophagus_Muscularis, Heart_Left_Ventricle, Lung, Muscle_Skeletal, Nerve_Tibial, Pituitary, Skin_Not_Sun_Exposed_Suprapubic, Sk…
HMGA1P2	4	Brain_Anterior_cingulate_cortex_BA24, Brain_Cerebellum, Heart_Left_Ventricle
HNRNPA1P66	2	Liver
HORMAD2	22	Testis
HPGDS	4	Brain_Amygdala, Brain_Cerebellar_Hemisphere, Brain_Hypothalamus, Brain_Putamen_basal_ganglia, Kidney_Cortex, Minor_Salivary_Gland, Ovary, Spleen, Testis
ITGA6	2	Brain_Amygdala, Brain_Caudate_basal_ganglia, Brain_Putamen_basal_ganglia, Esophagus_Muscularis, Pituitary, Prostate, Testis, Uterus, Whole_Blood
LGALSL	2	Adipose_Visceral_Omentum, Adrenal_Gland
MCAT	22	Adipose_Subcutaneous, Artery_Aorta, Artery_Coronary, Artery_Tibial, Brain_Caudate_basal_ganglia, Brain_Cortex, Brain_Frontal_Cortex_BA9, Brain_Nucleus_accumbens_basal_ganglia, Brain_Putamen_basal_ganglia, Brain_Spinal_cord_cervical_c-1, Cells_EBV-transformed_lymphocytes, Colon_Sigmoid, Esophagus_Gastroesophageal_Junction, Esophagus_Muscularis, Heart_Atrial_Appendage, Liver, Minor_Salivary_Gland, …
MDH1	2	Adipose_Subcutaneous, Adipose_Visceral_Omentum, Adrenal_Gland, Artery_Aorta, Artery_Coronary, Artery_Tibial, Brain_Anterior_cingulate_cortex_BA24, Brain_Cerebellum, Brain_Hypothalamus, Brain_Putamen_basal_ganglia, Brain_Spinal_cord_cervical_c-1, Breast_Mammary_Tissue, Cells_Cultured_fibroblasts, Cells_EBV-transformed_lymphocytes, Esophagus_Mucosa, Heart_Left_Ventricle, Lung, Muscle_Skeletal, Nerv…
MLPH	2	Adipose_Visceral_Omentum, Brain_Cortex, Cells_Cultured_fibroblasts, Esophagus_Mucosa, Kidney_Cortex, Prostate, Skin_Sun_Exposed_Lower_leg, Testis, Thyroid
MTA3	2	Brain_Cerebellum, Brain_Cortex, Brain_Frontal_Cortex_BA9, Brain_Spinal_cord_cervical_c-1, Cells_EBV-transformed_lymphocytes, Muscle_Skeletal, Pancreas
NDUFB3	2	Brain_Spinal_cord_cervical_c-1
NIF3L1	2	Kidney_Cortex, Liver, Ovary
NOL10	2	Adipose_Visceral_Omentum, Brain_Amygdala, Brain_Anterior_cingulate_cortex_BA24, Brain_Caudate_basal_ganglia, Brain_Cortex, Brain_Frontal_Cortex_BA9, Brain_Hippocampus, Brain_Hypothalamus, Brain_Nucleus_accumbens_basal_ganglia, Brain_Putamen_basal_ganglia, Brain_Spinal_cord_cervical_c-1, Brain_Substantia_nigra, Cells_Cultured_fibroblasts, Esophagus_Gastroesophageal_Junction, Esophagus_Mucosa, Kidn…
NPNT	4	Adrenal_Gland, Brain_Substantia_nigra, Cells_Cultured_fibroblasts, Colon_Sigmoid, Pancreas, Vagina
ODC1	2	Brain_Caudate_basal_ganglia, Colon_Sigmoid, Liver, Muscle_Skeletal, Nerve_Tibial, Pituitary, Skin_Not_Sun_Exposed_Suprapubic, Skin_Sun_Exposed_Lower_leg, Thyroid
OTX1	2	Adipose_Subcutaneous, Adipose_Visceral_Omentum, Brain_Caudate_basal_ganglia, Brain_Cortex, Brain_Hippocampus, Brain_Nucleus_accumbens_basal_ganglia, Cells_Cultured_fibroblasts, Esophagus_Mucosa, Lung, Ovary, Pancreas, Skin_Sun_Exposed_Lower_leg, Spleen, Stomach, Thyroid, Whole_Blood
OXER1	2	Artery_Aorta, Artery_Tibial, Brain_Anterior_cingulate_cortex_BA24, Brain_Caudate_basal_ganglia, Brain_Cerebellar_Hemisphere, Brain_Hippocampus, Brain_Hypothalamus, Brain_Nucleus_accumbens_basal_ganglia, Brain_Putamen_basal_ganglia, Brain_Spinal_cord_cervical_c-1, Brain_Substantia_nigra, Nerve_Tibial, Pancreas, Pituitary, Spleen, Thyroid, Whole_Blood
PACSIN2	22	Artery_Aorta, Brain_Anterior_cingulate_cortex_BA24, Brain_Caudate_basal_ganglia, Brain_Cerebellar_Hemisphere, Brain_Putamen_basal_ganglia, Pancreas, Skin_Sun_Exposed_Lower_leg
PDK1	2	Adrenal_Gland, Artery_Aorta, Brain_Caudate_basal_ganglia, Brain_Frontal_Cortex_BA9, Brain_Substantia_nigra, Cells_Cultured_fibroblasts, Colon_Sigmoid, Colon_Transverse, Heart_Atrial_Appendage, Lung, Muscle_Skeletal, Nerve_Tibial, Pancreas, Small_Intestine_Terminal_Ileum, Spleen, Stomach, Vagina, Whole_Blood
PLEKHH2	2	Brain_Spinal_cord_cervical_c-1, Cells_EBV-transformed_lymphocytes
POLI	18	Adipose_Subcutaneous, Adipose_Visceral_Omentum, Adrenal_Gland, Artery_Aorta, Artery_Coronary, Artery_Tibial, Brain_Amygdala, Brain_Anterior_cingulate_cortex_BA24, Brain_Caudate_basal_ganglia, Brain_Cerebellar_Hemisphere, Brain_Cerebellum, Brain_Frontal_Cortex_BA9, Brain_Hippocampus, Brain_Hypothalamus, Brain_Nucleus_accumbens_basal_ganglia, Brain_Putamen_basal_ganglia, Brain_Spinal_cord_cervical_…
PPA2	4	Adipose_Subcutaneous, Adipose_Visceral_Omentum, Artery_Aorta, Brain_Amygdala, Brain_Anterior_cingulate_cortex_BA24, Brain_Caudate_basal_ganglia, Brain_Cerebellar_Hemisphere, Brain_Cerebellum, Brain_Frontal_Cortex_BA9, Brain_Hippocampus, Brain_Nucleus_accumbens_basal_ganglia, Brain_Putamen_basal_ganglia, Brain_Spinal_cord_cervical_c-1, Breast_Mammary_Tissue, Cells_Cultured_fibroblasts, Cells_EBV-t…
RASSF6	4	Liver, Ovary, Pancreas, Prostate, Small_Intestine_Terminal_Ileum, Uterus
RNF181	2	Artery_Aorta, Artery_Coronary, Artery_Tibial, Brain_Cerebellar_Hemisphere, Brain_Hypothalamus, Brain_Spinal_cord_cervical_c-1, Brain_Substantia_nigra, Cells_EBV-transformed_lymphocytes, Colon_Transverse, Esophagus_Mucosa, Heart_Atrial_Appendage, Skin_Not_Sun_Exposed_Suprapubic, Stomach, Vagina, Whole_Blood
SEPT2	2	Adipose_Subcutaneous, Adipose_Visceral_Omentum, Adrenal_Gland, Artery_Aorta, Artery_Coronary, Artery_Tibial, Brain_Amygdala, Brain_Anterior_cingulate_cortex_BA24, Brain_Caudate_basal_ganglia, Brain_Cerebellar_Hemisphere, Brain_Cerebellum, Brain_Cortex, Brain_Frontal_Cortex_BA9, Brain_Hippocampus, Brain_Hypothalamus, Brain_Nucleus_accumbens_basal_ganglia, Brain_Putamen_basal_ganglia, Brain_Spinal_…
SETD7	4	Brain_Substantia_nigra
SMAD2	18	Lung, Whole_Blood
STRADB	2	Brain_Anterior_cingulate_cortex_BA24, Brain_Substantia_nigra, Cells_Cultured_fibroblasts, Pancreas
TBX1	22	Brain_Substantia_nigra, Esophagus_Mucosa, Minor_Salivary_Gland, Muscle_Skeletal, Nerve_Tibial, Pancreas, Prostate
TCF7L1	2	Pituitary
TET2	4	Adipose_Subcutaneous, Adipose_Visceral_Omentum, Artery_Coronary, Artery_Tibial, Brain_Caudate_basal_ganglia, Brain_Putamen_basal_ganglia, Breast_Mammary_Tissue, Cells_EBV-transformed_lymphocytes, Esophagus_Gastroesophageal_Junction, Esophagus_Mucosa, Esophagus_Muscularis, Heart_Atrial_Appendage, Lung, Muscle_Skeletal, Nerve_Tibial, Pancreas, Skin_Not_Sun_Exposed_Suprapubic, Skin_Sun_Exposed_Lower…
TMEM150A	2	Brain_Cerebellar_Hemisphere, Brain_Cerebellum, Brain_Frontal_Cortex_BA9, Brain_Hippocampus, Colon_Transverse, Esophagus_Mucosa, Heart_Atrial_Appendage, Heart_Left_Ventricle, Muscle_Skeletal, Prostate, Skin_Sun_Exposed_Lower_leg, Whole_Blood
TMEM237	2	Brain_Cortex, Heart_Atrial_Appendage
TNFAIP6	2	Brain_Spinal_cord_cervical_c-1, Liver
TRAK2	2	Brain_Cerebellar_Hemisphere, Brain_Frontal_Cortex_BA9, Brain_Hypothalamus, Colon_Sigmoid, Liver, Skin_Sun_Exposed_Lower_leg
TSPO	22	Adipose_Subcutaneous, Adipose_Visceral_Omentum, Adrenal_Gland, Artery_Aorta, Artery_Coronary, Artery_Tibial, Brain_Caudate_basal_ganglia, Brain_Cerebellar_Hemisphere, Brain_Frontal_Cortex_BA9, Brain_Hippocampus, Brain_Hypothalamus, Brain_Putamen_basal_ganglia, Brain_Spinal_cord_cervical_c-1, Brain_Substantia_nigra, Breast_Mammary_Tissue, Cells_Cultured_fibroblasts, Cells_EBV-transformed_lymphocyt…
UGP2	2	Adipose_Subcutaneous, Adipose_Visceral_Omentum, Adrenal_Gland, Brain_Hippocampus, Esophagus_Gastroesophageal_Junction, Heart_Atrial_Appendage, Heart_Left_Ventricle, Liver, Lung, Minor_Salivary_Gland, Muscle_Skeletal, Nerve_Tibial, Vagina
USP39	2	Adipose_Subcutaneous, Adrenal_Gland, Brain_Amygdala, Brain_Hypothalamus, Breast_Mammary_Tissue, Cells_Cultured_fibroblasts, Colon_Sigmoid, Colon_Transverse, Esophagus_Mucosa, Esophagus_Muscularis, Heart_Atrial_Appendage, Liver, Muscle_Skeletal, Ovary, Prostate, Skin_Not_Sun_Exposed_Suprapubic, Skin_Sun_Exposed_Lower_leg, Small_Intestine_Terminal_Ileum, Spleen, Stomach, Uterus
VAMP8	2	Artery_Aorta, Brain_Caudate_basal_ganglia, Brain_Frontal_Cortex_BA9, Brain_Nucleus_accumbens_basal_ganglia, Brain_Putamen_basal_ganglia, Breast_Mammary_Tissue, Colon_Sigmoid, Esophagus_Mucosa, Heart_Left_Ventricle, Minor_Salivary_Gland, Muscle_Skeletal, Prostate, Skin_Not_Sun_Exposed_Suprapubic, Skin_Sun_Exposed_Lower_leg
WDPCP	2	Adipose_Subcutaneous, Adipose_Visceral_Omentum, Adrenal_Gland, Artery_Aorta, Artery_Coronary, Brain_Anterior_cingulate_cortex_BA24, Brain_Caudate_basal_ganglia, Brain_Cerebellar_Hemisphere, Brain_Cerebellum, Brain_Cortex, Brain_Frontal_Cortex_BA9, Brain_Hippocampus, Brain_Hypothalamus, Brain_Nucleus_accumbens_basal_ganglia, Brain_Putamen_basal_ganglia, Brain_Spinal_cord_cervical_c-1, Breast_Mamma…
ZFP36L2	2	Adipose_Visceral_Omentum, Artery_Aorta, Artery_Tibial, Brain_Caudate_basal_ganglia, Brain_Hypothalamus, Breast_Mammary_Tissue, Cells_Cultured_fibroblasts, Cells_EBV-transformed_lymphocytes, Heart_Atrial_Appendage, Liver, Small_Intestine_Terminal_Ileum, Testis, Vagina, Whole_Blood

## Sheet: Table S3
Table S3. 946 candidate genes were identified after the conditional and joint analysis
Tissues	ID	CHR	BEST.GWAS.ID	BEST.GWAS.Z	EQTL.ID	EQTL.Z	EQTL.GWAS.Z	NSNP	TWAS.Z	TWAS.P	TWAS.Bonferroni.P	JOINT	TOP.SNP.COR
Brain_Cortex	RP4-734G22.3	1	rs2056417	-7.085	rs3748576	3.342	4.65517	415	5.80749	6.34e-09	0.000117715	TRUE	-0.37
Breast_Mammary_Tissue	CENPS	1	rs2056417	-7.085	rs1307497	4.06	-4.68571	382	-5.73	1.01e-08	0.000198162	TRUE	0.52
Esophagus_Muscularis	DFFA	1	rs2056417	-7.085	rs670666	5.323	5.07273	403	5.07273	3.92e-07	0.0075068	TRUE	-0.54
Heart_Left_Ventricle	DFFA	1	rs2056417	-7.08	rs7543322	-6.03	-5.01818	394	5.21485	1.84e-07	0.00299239	TRUE	-0.61
Liver	PEX14	1	rs2056417	-7.08	rs491880	-6.618	-3.96491	404	4.8611	1.17e-06	0.0186358	TRUE	-0.59
Liver	CORT	1	rs2056417	-7.08	rs1307490	-4.288	-4.78095	391	4.78095	1.74e-06	0.0277147	TRUE	0.25
Nerve_Tibial	CENPS	1	rs2056417	-7.085	rs544289	7.727	-4.14737	383	-5.60134	2.13e-08	0.000453158	TRUE	0.55
Pancreas	DFFA	1	rs2056417	-7.085	rs1307485	-4.216	-5.0182	396	5.01818	5.22e-07	0.0090306	TRUE	-0.66
Brain_Amygdala	RP3-455J7.4	1	rs7549340	4.984	rs10494471	3.6567	4.76829	553	4.77	1.86e-06	0.0308667	TRUE	-0.68
Esophagus_Gastroesophageal_Junction	TSEN15	1	rs997343	-6.103	rs971572	4.038	-5.58621	503	-5.58621	2.32e-08	0.000426532	TRUE	0.07
Liver	RP11-181K3.4	1	rs2027084	-7.6	rs10797893	-2.832	1.45545	435	-7.80172	6.11e-15	9.73e-11	TRUE	0.75
Skin_Not_Sun_Exposed_Suprapubic	RP11-382D12.2	1	rs997343	-6.103	rs6684045	-4.163	-5.54098	489	6.3014	2.95e-10	6.02e-06	TRUE	-0.11
Adrenal_Gland	SOX13	1	rs4951401	-14.508	rs885330	-3.1168	-5.51667	508	5.51667	3.45e-08	0.000609615	TRUE	0.04
Artery_Tibial	LRRN2	1	rs4951401	-14.508	rs1008833	3.271	5.85526	616	5.85526	4.76e-09	9.05e-05	TRUE	-0.33
Brain_Caudate_basal_ganglia	MDM4	1	rs4951401	-14.508	rs4252697	-2.835	7.11594	620	-7.06729	1.58e-12	2.86e-08	TRUE	0.4
Brain_Nucleus_accumbens_basal_ganglia	SOX13	1	rs4951401	-14.508	rs4951393	3.371	-13.15	501	-13.2	1.7e-39	3.09e-35	TRUE	0.43
Brain_Spinal_cord_cervical_c-1	RAB29	1	rs7522056	7.237	rs823114	-3.862	6.61818	424	-6.62	3.64e-11	6.28e-07	TRUE	0
Cells_EBV-transformed_lymphocytes	RAB29	1	rs7522056	7.237	rs823114	-4.021	6.61818	426	-6.62	3.64e-11	5.77e-07	TRUE	-0.03
Esophagus_Gastroesophageal_Junction	SLC41A1	1	rs7522056	7.237	rs708727	4.8	-5.57143	402	-5.57143	2.53e-08	0.000465141	TRUE	0.01
Esophagus_Mucosa	RBBP5	1	rs884108	-10.164	rs10900418	-3.436	-6.51724	589	6.52	7.16e-11	1.38e-06	TRUE	-0.26
Esophagus_Mucosa	RAB29	1	rs7522056	7.237	rs823144	-10.662	4.26562	428	-6.31	2.85e-10	5.5e-06	TRUE	0.01
Kidney_Cortex	NFASC	1	rs4951401	-14.508	rs2815832	-2.447	-5.4	570	5.4	6.66e-08	0.00107353	TRUE	0.34
Muscle_Skeletal	LRRN2	1	rs4951401	-14.508	rs1563828	-3.089	-13.1167	623	7.35213	1.95e-13	3.37e-09	TRUE	-0.55
Muscle_Skeletal	C1orf186	1	rs7522056	7.237	rs3761919	3.298	7.03175	341	7.03175	2.04e-12	3.52e-08	TRUE	-0.01
Pancreas	PIK3C2B	1	rs4951401	-14.508	rs4252675	3.487	-7.0902	604	-4.70928	2.49e-06	0.043077	TRUE	0.27
Prostate	MDM4	1	rs4951401	-14.508	rs4245739	3.732	-14.4444	627	-14.4444	2.72e-47	5.19e-43	TRUE	0.68
Skin_Sun_Exposed_Lower_leg	SOX13	1	rs4951401	-14.508	rs6660778	-3.0734	-2.04615	501	5.12079	3.04e-07	0.00633354	TRUE	-0.23
Stomach	NUCKS1	1	rs7522056	7.237	rs823096	-4.906	-5.4464	440	5.44643	5.14e-08	0.000919289	TRUE	0.01
Uterus	RAB29	1	rs7522056	7.24	rs823114	-3.34	6.61818	423	-6.61818	3.64e-11	6.2e-07	TRUE	0.02
Whole_Blood	NUCKS1	1	rs7522056	7.237	rs823105	-5.857	-5.1964	441	5.2	2.03e-07	0.00330139	TRUE	-0.01
Pancreas	LGALS8	1	rs3768105	-4.871	rs10754573	6.828	-4.2414	622	-4.84589	1.26e-06	0.021798	TRUE	-0.04
Artery_Coronary	MT1XP1	1	rs10803412	4.986	rs7544175	-2.7671	-3.06897	316	6.13	8.58e-10	1.51e-05	TRUE	0.16
Brain_Hypothalamus	CLCNKB	1	rs10803412	4.986	rs10803412	-3.018	4.98611	376	-4.98611	6.16e-07	0.0107172	TRUE	-0.55
Brain_Nucleus_accumbens_basal_ganglia	ANO7L1	1	rs10803412	4.986	rs12015135	-2.917	4.82353	323	-4.82	1.41e-06	0.0256225	TRUE	-0.55
Colon_Sigmoid	FLJ37453	1	rs10803412	4.99	rs4661661	5.1552	3.75294	423	5.14115	2.73e-07	0.00506388	TRUE	0.58
Kidney_Cortex	ANO7L1	1	rs10803412	4.986	rs28757713	3.364	4.77465	322	4.77465	1.8e-06	0.0290142	TRUE	0.53
Skin_Not_Sun_Exposed_Suprapubic	FAM131C	1	rs10803412	4.986	rs12015135	-3.922	4.82353	371	-4.82353	1.41e-06	0.0287725	TRUE	-0.54
Testis	RP11-5P18.10	1	rs10803412	4.99	rs41339145	-3.6785	2.9744	378	-6.4381	1.21e-10	3.34e-06	TRUE	-0.62
Uterus	FLJ37453	1	rs10803412	4.99	rs4661663	3.51	4.36	422	5.31385	1.07e-07	0.00182135	TRUE	0.74
Brain_Caudate_basal_ganglia	SRSF10	1	rs536577	-5.407	rs4648860	2.877	3.08333	402	6.65114	2.91e-11	5.26e-07	TRUE	-0.46
Brain_Caudate_basal_ganglia	MAP3K6	1	rs11247639	5.217	rs11247639	-3.225	5.21667	230	-5.21645	1.82e-07	0.00329056	TRUE	-0.05
Adipose_Visceral_Omentum	HPDL	1	rs7525281	6.226	rs4660316	-3.319	-2.0688	288	5.48	4.22e-08	0.000816654	TRUE	0.35
Adipose_Visceral_Omentum	TSPAN1	1	rs4420029	6.738	rs11584024	-3.2013	1.4211	319	-4.73	2.25e-06	0.043542	TRUE	-0.32
Artery_Tibial	NASP	1	rs4420029	6.738	rs12139364	-2.869	-1.78182	289	4.81794	1.45e-06	0.0275558	TRUE	0.25
Brain_Caudate_basal_ganglia	IPP	1	rs4420029	6.738	rs4660863	-2.874	-4	296	5.30724	1.11e-07	0.00200688	TRUE	0.46
Heart_Atrial_Appendage	TMEM69	1	rs4420029	6.738	rs1053941	-3.332	4.9375	286	-4.94	7.91e-07	0.0142246	TRUE	-0.64
Minor_Salivary_Gland	ARTN	1	rs669446	-5.51	rs669446	3.469	-5.5085	411	-5.51	3.62e-08	0.000638315	TRUE	-0.02
Ovary	PIK3R3	1	rs4420029	6.738	rs4420029	-3.065	6.7377	325	-7.17881	7.03e-13	1.25e-08	TRUE	-0.77
Skin_Not_Sun_Exposed_Suprapubic	NSUN4	1	rs4420029	6.738	rs12142240	-3.521	5.21667	351	-5.21667	1.82e-07	0.00371389	TRUE	-0.21
Stomach	PIK3R3	1	rs4420029	6.738	rs12138736	-2.128	0.2456	320	-4.93493	8.02e-07	0.0143438	TRUE	-0.28
Testis	ZYG11B	1	rs536621	-4.6	rs11206019	5.5987	-4.5616	367	-4.95014	7.42e-07	0.0204562	TRUE	0.05
Artery_Coronary	RP11-60A14.1	1	rs4655986	8.625	rs6677939	-4.1199	4.39655	462	-5.19	2.08e-07	0.00366704	TRUE	-0.25
Colon_Transverse	LMO4	1	rs4655986	8.62	rs10923045	-3.62	7.39286	472	-7.39286	1.44e-13	2.77e-09	TRUE	-0.41
Spleen	DNASE2B	1	rs3121147	4.895	rs1981254	5.457	4.85965	508	4.9	9.35e-07	0.0179024	TRUE	-0.01
Brain_Nucleus_accumbens_basal_ganglia	UBL4B	1	rs1021880	-3.955	rs4970768	3.052	-2.80357	540	-4.99	6.07e-07	0.0110304	TRUE	0.15
Adipose_Subcutaneous	RUSC1	1	rs3753639	-10.818	rs12023499	-2.4885	5.75	261	-5.75	8.92e-09	0.000179372	TRUE	0.01
Adipose_Subcutaneous	S100A7	1	rs10127983	12.051	rs4434872	2.6859	-5.52778	462	-5.52778	3.24e-08	0.000651532	TRUE	-0.08
Adipose_Visceral_Omentum	RP11-422P24.11	1	rs10127983	12.051	rs10494299	-3.0711	0.1858	329	10	1.23e-23	2.38e-19	TRUE	0.65
Adipose_Visceral_Omentum	RP11-126K1.2	1	rs267738	10.439	rs7532312	3.2798	-4.9895	302	-4.99	6.06e-07	0.0117273	TRUE	-0.1
Adrenal_Gland	FDPS	1	rs3753639	-10.818	rs11264303	-2.2449	7.74545	274	-7.74545	9.52e-15	1.68e-10	TRUE	0.01
Artery_Tibial	RAB13	1	rs10127983	12.051	rs11264743	2.728	11.9322	330	10.5622	4.46e-26	8.48e-22	TRUE	0.7
Brain_Anterior_cingulate_cortex_BA24	RRNAD1	1	rs11264631	-6.222	rs12140437	2.867	-4.88333	446	-6.5291	6.62e-11	1.14e-06	TRUE	0
Brain_Cerebellum	RUSC1	1	rs3753639	-10.818	rs6686021	2.656	5.7931	261	5.7931	6.91e-09	0.000136625	TRUE	-0.02
Brain_Cortex	SHC1	1	rs3753639	-10.818	rs11264270	2.834	4.80488	391	4.80488	1.55e-06	0.0287789	TRUE	-0.01
Brain_Hippocampus	GOLPH3L	1	rs267738	10.439	rs10305695	2.613	-6.65584	303	-6.65584	2.82e-11	4.78e-07	TRUE	-0.09
Brain_Spinal_cord_cervical_c-1	SETDB1	1	rs267738	10.439	rs10305700	-2.6	5.14976	304	-5.15	2.61e-07	0.00450486	TRUE	0.07
Brain_Spinal_cord_cervical_c-1	RPS27AP6	1	rs267738	10.439	rs3811406	-3.039	1.89394	300	-4.69	2.68e-06	0.0462568	TRUE	0.06
Cells_Cultured_fibroblasts	ETV3	1	rs11264631	-6.222	rs16837989	-4.269	4.69444	507	-4.69466	2.67e-06	0.0481748	TRUE	-0.05
Cells_EBV-transformed_lymphocytes	PMF1	1	rs10047112	5.911	rs1052067	-3.696	4.14754	375	-4.9	9.76e-07	0.0154696	TRUE	0.06
Colon_Sigmoid	S100A4	1	rs10127983	12.05	rs3014823	-3.045	0.3	423	-4.82781	1.38e-06	0.0255976	TRUE	-0.51
Esophagus_Muscularis	ZBTB7B	1	rs3753639	-10.818	rs905938	-7.234	-9.60317	385	11.4745	1.77e-30	3.39e-26	TRUE	-0.03
Esophagus_Muscularis	ASH1L	1	rs4971066	6.548	rs7541	-3.211	3.98667	224	-5.71045	1.13e-08	0.000216395	TRUE	0.01
Heart_Left_Ventricle	ARNT	1	rs267738	10.44	rs12568757	6.44	-6.63636	302	-6.67046	2.55e-11	4.15e-07	TRUE	-0.04
Heart_Left_Ventricle	CRABP2	1	rs2027291	-5.98	rs11264630	-2.292	-5.18919	443	5.18919	2.11e-07	0.00343149	TRUE	-0.05
Kidney_Cortex	RP11-29H23.5	1	rs10047112	5.911	rs915179	2.872	5.69643	220	6.49773	8.15e-11	1.31e-06	TRUE	-0.05
Kidney_Cortex	TARS2	1	rs267738	10.439	rs2055975	-3.292	3.62295	279	-6.17514	6.61e-10	1.07e-05	TRUE	0
Kidney_Cortex	MLLT11	1	rs267738	10.439	rs10305724	-2.863	6.16216	310	-6.16216	7.18e-10	1.16e-05	TRUE	-0.03
Kidney_Cortex	INSRR	1	rs11264631	-6.222	rs4661098	2.182	-5.95604	445	-5.95604	2.58e-09	4.16e-05	TRUE	0.04
Lung	SLC50A1	1	rs3753639	-10.82	rs4971073	2.929	3.40351	352	4.96179	6.98e-07	0.0144695	TRUE	0.04
Lung	RRNAD1	1	rs11264631	-6.22	rs12140437	5.022	-4.88333	449	-4.88333	1.04e-06	0.0215592	TRUE	0.05
Muscle_Skeletal	CERS2	1	rs267738	10.439	rs17599629	-3.517	9.59701	314	-9.59701	8.23e-22	1.42e-17	TRUE	-0.01
Nerve_Tibial	FCRL5	1	rs11264631	-6.222	rs11583406	-3.593	-4.86301	510	4.86301	1.16e-06	0.024679	TRUE	0.06
Ovary	RUSC1	1	rs3753639	-10.818	rs4845408	1.536	5.98649	261	5.98649	2.14e-09	3.82e-05	TRUE	0
Ovary	PRPF3	1	rs17599629	9.597	rs11205277	2.112	-3.16071	249	-5.27892	1.3e-07	0.00231881	TRUE	0.02
Pancreas	GOLPH3L	1	rs267738	10.439	rs267734	2.839	10.3433	299	10.6567	1.62e-26	2.8e-22	TRUE	0.04
Pancreas	NTRK1	1	rs11264631	-6.222	rs6668857	-3.045	2.2909	455	-6.00521	1.91e-09	3.3e-05	TRUE	-0.04
Pituitary	FLAD1	1	rs3753639	-10.818	rs925042	3.4749	0.6	389	6.24	4.41e-10	8.89e-06	TRUE	-0.01
Prostate	BNIPL	1	rs267738	10.439	rs16837903	-2.063	5.1519	299	-5.1519	2.58e-07	0.00492006	TRUE	0.05
Skin_Not_Sun_Exposed_Suprapubic	RP11-74C1.4	1	rs12068365	6.194	rs7007	-3.561	4.57692	330	-5.29829	1.17e-07	0.0023875	TRUE	0
Small_Intestine_Terminal_Ileum	CRABP2	1	rs2027291	-5.978	rs4661019	-3.252	-4.84932	442	5.43584	5.45e-08	0.000998822	TRUE	-0.03
Stomach	PYGO2	1	rs3753639	-10.818	rs1218565	-2.568	-4.4107	396	5.78902	7.08e-09	0.000126626	TRUE	0
Thyroid	DCST1-AS1	1	rs3753639	-10.818	rs11264297	-4.206	8.59649	378	-8.6	8.22e-18	1.77e-13	TRUE	0.05
Vagina	SLC50A1	1	rs3753639	-10.818	rs7528548	2.838	-0.5612	350	6.01077	1.85e-09	3.22e-05	TRUE	-0.01
Vagina	KIAA0907	1	rs10047112	5.911	rs11264431	2.216	4.9643	285	4.96429	6.9e-07	0.0120239	TRUE	0.02
Whole_Blood	ZBTB7B	1	rs3753639	-10.818	rs3753639	-3.48	-10.8182	385	6.87	6.64e-12	1.08e-07	TRUE	-0.02
Whole_Blood	BX470102.3	1	rs10127983	12.051	rs11264446	2.771	-4.6741	429	-4.67	2.95e-06	0.0479759	TRUE	0.65
Brain_Putamen_basal_ganglia	RP11-500G22.4	10	rs7072877	-4.95	rs11200201	4.92	1.2192	616	-6.04927	1.46e-09	2.51e-05	TRUE	0.07
Pancreas	RP11-59C5.3	10	rs7077275	8.89	rs3781446	4.7	-6.16071	543	-6.16071	7.24e-10	1.25e-05	TRUE	-0.03
Skin_Not_Sun_Exposed_Suprapubic	RP11-95I16.6	10	rs10886844	10.54	rs10886898	4.9	-7.9231	671	-7.92308	2.32e-15	4.73e-11	TRUE	0.07
Stomach	CTBP2	10	rs7077275	8.89	rs4962416	4.15	8.74194	490	8.74194	2.29e-18	4.1e-14	TRUE	0
Testis	RP11-78A18.2	10	rs10749415	-8.18	rs7072877	-3.52	-4.9538	594	4.95385	7.28e-07	0.0200702	TRUE	-0.06
Adipose_Subcutaneous	FAM208B	10	rs11259192	7.35	rs11259192	4.5	7.3452	690	7.34524	2.05e-13	4.12e-09	TRUE	0.54
Adipose_Visceral_Omentum	GDI2	10	rs11259192	7.35	rs2275774	-9.59	5.57353	699	-5.57353	2.5e-08	0.0004838	TRUE	0.41
Brain_Putamen_basal_ganglia	GDI2	10	rs11259192	7.35	rs2275774	-3.68	5.5735	698	-5.41196	6.23e-08	0.00106975	TRUE	0.07
Nerve_Tibial	FAM208B	10	rs11259192	7.35	rs11259192	4.33	7.3452	689	7.34524	2.05e-13	4.36e-09	TRUE	0.42
Ovary	GDI2	10	rs11259192	7.35	rs1858446	-5.51	4.9688	694	-4.96875	6.74e-07	0.0120221	TRUE	0.23
Skin_Sun_Exposed_Lower_leg	IL2RA	10	rs11259192	7.35	rs4469789	3.37	-6.49123	734	-6.49	8.51e-11	1.77e-06	TRUE	-0.27
Adrenal_Gland	COMMD3	10	rs12767557	-5.1	rs7899156	1.97	-5.03448	276	-5.03448	4.79e-07	0.00846393	TRUE	0.39
Adipose_Visceral_Omentum	NPY4R	10	rs10993994	35.59	rs17769532	-2.88	-2.04478	97	7.99886	1.26e-15	2.44e-11	TRUE	0.15
Adipose_Visceral_Omentum	SYT15	10	rs10825652	30.33	rs12775238	-4.63	-0.85075	68	6.8097	9.78e-12	1.89e-07	TRUE	0.12
Adrenal_Gland	DYNC1I2P1	10	rs11815370	-4.82	rs11815370	-2.56	-4.82353	300	4.82353	1.41e-06	0.0249147	TRUE	-0.09
Artery_Aorta	ANXA8L1	10	rs10993994	35.59	rs4926057	-2.99	4.319	97	6.04153	1.53e-09	2.88e-05	TRUE	0.12
Brain_Amygdala	ANXA8L1	10	rs10993994	35.59	rs7072255	2.89	5.35644	95	5.35644	8.49e-08	0.00140892	TRUE	0.48
Brain_Anterior_cingulate_cortex_BA24	AGAP10P	10	rs10993994	35.59	rs10761581	4.1	-2.0508	231	-5.33412	9.6e-08	0.00164669	TRUE	-0.14
Brain_Caudate_basal_ganglia	ALOX5	10	rs7091141	-10.24	rs2282350	-2.98	4.12903	338	-4.8827	1.05e-06	0.018984	TRUE	-0.04
Brain_Frontal_Cortex_BA9	ANXA8L1	10	rs10993994	35.59	rs7899396	4.14	2.4375	96	4.84	1.32e-06	0.0234432	TRUE	0.08
Breast_Mammary_Tissue	C10orf25	10	rs7090755	-7.39	rs3740093	5.8	-5.6535	452	-5.65354	1.57e-08	0.000308034	TRUE	-0.02
Colon_Transverse	NCOA4	10	rs10993994	35.59	rs7086046	2.78	0.8254	144	11.0816	1.54e-28	2.96e-24	TRUE	0.29
Esophagus_Mucosa	FAM21FP	10	rs10993994	35.59	rs11239587	5.97	5.10769	222	4.81033	1.51e-06	0.0291264	TRUE	0.11
Liver	NCOA4	10	rs10993994	35.59	rs11239574	2.47	-6.285	144	-6.285	3.28e-10	5.22e-06	TRUE	-0.1
Prostate	C10orf10	10	rs7090755	-7.39	rs17417442	3.24	-5.36364	451	-5.36364	8.16e-08	0.00155611	TRUE	-0.02
Skin_Not_Sun_Exposed_Suprapubic	FAM25BP	10	rs10993994	35.59	rs4500424	-3.72	0.3418	97	-8.15955	3.36e-16	6.86e-12	TRUE	-0.19
Spleen	2025-03-08	10	rs10993994	35.59	rs2291427	4.62	5.45763	262	7.14251	9.16e-13	1.75e-08	TRUE	0.11
Spleen	FAM21FP	10	rs10993994	35.59	rs7074524	6.2	5.25	222	5.06556	4.07e-07	0.00779283	TRUE	0.08
Testis	C10orf53	10	rs11812635	6.73	rs1133837	-10.86	5.6	341	-5.84239	5.15e-09	0.00014198	TRUE	-0.01
Esophagus_Gastroesophageal_Junction	ANXA11	10	rs12416455	3.98	rs12412762	5.97	3.88764	448	4.87049	1.11e-06	0.0204074	TRUE	0.01
Artery_Tibial	SLK	10	rs7902587	6.27	rs2487999	3.46	6.1087	417	6.50288	7.88e-11	1.5e-06	TRUE	-0.04
Brain_Hippocampus	SUFU	10	rs12241712	-10.82	rs5870	4.33	9.09091	333	5.09267	3.53e-07	0.00597841	TRUE	-0.41
Brain_Hypothalamus	ARL3	10	rs12241712	-10.82	rs12764388	3.22	-8.82558	364	-8.82558	1.09e-18	1.9e-14	TRUE	-0.14
Liver	SUFU	10	rs12241712	-10.82	rs12413996	-2.74	-1.5281	333	10.9022	1.12e-27	1.78e-23	TRUE	-0.64
Ovary	RPARP-AS1	10	rs12241712	-10.82	rs12241712	-1.93	-10.8167	339	10.8167	2.87e-27	5.12e-23	TRUE	-0.69
Prostate	RPARP-AS1	10	rs12241712	-10.82	rs1056738	5.17	8.85965	339	11.5384	8.45e-31	1.61e-26	TRUE	-0.74
Skin_Not_Sun_Exposed_Suprapubic	WBP1L	10	rs12241712	-10.82	rs11594179	-2.72	-1.6418	357	7.32941	2.31e-13	4.71e-09	TRUE	-0.36
Heart_Left_Ventricle	ADRB1	10	rs642602	4.82	rs476525	-2.45	4.68675	553	-4.68675	2.78e-06	0.0452111	TRUE	-0.04
Artery_Aorta	INS	11	rs7127900	23.31	rs16924843	2.92	-0.29204	391	10.9012	1.14e-27	2.15e-23	TRUE	0.46
Artery_Coronary	CD81	11	rs7127900	23.31	rs7936703	2.71	0.41538	434	-9.47335	2.71e-21	4.78e-17	TRUE	-0.35
Brain_Anterior_cingulate_cortex_BA24	OSBPL5	11	rs734458	5.96	rs11025599	-3.03	5.2099	447	-5.20988	1.89e-07	0.00324192	TRUE	0.01
Brain_Cortex	AC068580.5	11	rs7127900	23.31	rs12418425	-3.13	4.2907	401	-4.75	2.07e-06	0.0384337	TRUE	0.04
Brain_Substantia_nigra	LSP1	11	rs7127900	23.31	rs907611	3.24	1.6167	425	-4.74861	2.05e-06	0.0330337	TRUE	-0.28
Lung	TH	11	rs7127900	23.31	rs10743149	3.13	0.6744	395	5.59686	2.18e-08	0.000451914	TRUE	0.21
Minor_Salivary_Gland	LSP1	11	rs7127900	23.31	rs11041553	3.04	-1.04255	424	-7.98617	1.39e-15	2.45e-11	TRUE	-0.22
Muscle_Skeletal	OSBPL5	11	rs734458	5.96	rs734458	10.37	5.9647	447	5.52027	3.38e-08	0.000583996	TRUE	-0.03
Muscle_Skeletal	ASCL2	11	rs7127900	23.31	rs3922756	-3.23	14.5862	426	-5.48403	4.16e-08	0.000718765	TRUE	-0.26
Nerve_Tibial	IGF2-AS	11	rs7127900	23.31	rs10743182	3.59	20.8219	406	20.8219	2.74e-96	5.83e-92	TRUE	0.58
Skin_Sun_Exposed_Lower_leg	TH	11	rs7127900	23.31	rs11042978	-9.41	6.89091	393	-6.89091	5.54e-12	1.15e-07	TRUE	-0.58
Small_Intestine_Terminal_Ileum	LSP1	11	rs7127900	23.31	rs7111341	2.64	15.3871	426	15.3871	2e-53	3.67e-49	TRUE	0.16
Testis	TSSC4	11	rs7127900	23.31	rs234873	3.03	1.9464	434	5.5512	2.84e-08	0.00078296	TRUE	0.16
Whole_Blood	TSSC4	11	rs7127900	23.31	rs10743182	2.72	20.8219	432	20.8	2.74e-96	4.46e-92	TRUE	0.26
Whole_Blood	IGF2	11	rs7127900	23.31	rs3842727	-4.4	6.77419	404	-7.25	4.12e-13	6.7e-09	TRUE	-0.17
Spleen	RP11-627G23.1	11	rs11223794	6.91	rs11223794	-5.6	6.91026	615	-6.91	4.84e-12	9.27e-08	TRUE	-0.73
Adrenal_Gland	SYT9	11	rs7121523	6.03	rs12790440	3.51	4.127	680	4.85034	1.23e-06	0.0217341	TRUE	0.21
Esophagus_Mucosa	PPFIBP2	11	rs7121523	6.03	rs12791447	7.32	4.79439	661	4.95103	7.38e-07	0.0142353	TRUE	0.24
Esophagus_Muscularis	AKIP1	11	rs2455603	4.81	rs1560569	4.71	-3.625	369	-5.53473	3.12e-08	0.00059748	TRUE	0.01
Minor_Salivary_Gland	PPFIBP2	11	rs7121523	6.03	rs12791447	4.21	4.79439	652	4.79439	1.63e-06	0.0287418	TRUE	0.17
Brain_Cortex	QSER1	11	rs7946086	-5.44	rs2746036	-4.9	5.22785	327	-5.74	9.51e-09	0.000176572	TRUE	0.08
Cells_EBV-transformed_lymphocytes	RP1-181J22.1	11	rs7946086	-5.44	rs3858445	-2.79	-4.78788	366	4.7879	1.69e-06	0.0267865	TRUE	-0.62
Stomach	CD44	11	rs9804460	-5.13	rs9804460	3.39	-5.1292	673	-5.02134	5.13e-07	0.009175	TRUE	-0.04
Brain_Caudate_basal_ganglia	CELF1	11	rs2293576	7.54	rs11039448	-2.97	4.4821	276	-5.03128	4.87e-07	0.00880496	TRUE	-0.71
Brain_Frontal_Cortex_BA9	RP11-163O19.1	11	rs7113075	-5.04	rs6485981	2.36	-5.0182	210	-4.95	7.54e-07	0.013391	TRUE	-0.12
Cells_EBV-transformed_lymphocytes	RP11-61N20.3	11	rs7113075	-5.04	rs10839272	-2.35	-4.99057	207	4.9882	6.1e-07	0.0096685	TRUE	0.07
Esophagus_Gastroesophageal_Junction	FAM180B	11	rs2293576	7.54	rs7943570	-3.4	-3.9029	278	4.93022	8.21e-07	0.0150941	TRUE	0.52
Esophagus_Mucosa	PACSIN3	11	rs2293576	7.54	rs17790390	9.71	-4.06122	293	-5.17377	2.29e-07	0.00441718	TRUE	-0.27
Ovary	PACSIN3	11	rs2293576	7.54	rs12576839	3.87	-4.2551	292	-6.00616	1.9e-09	3.39e-05	TRUE	-0.5
Prostate	PACSIN3	11	rs2293576	7.54	rs12577603	6.46	-4.62366	293	-5.04498	4.54e-07	0.00865778	TRUE	-0.17
Artery_Aorta	KDM2A	11	rs7952436	6.38	rs7952436	-4.86	6.38393	238	-6.38393	1.73e-10	3.26e-06	TRUE	0.11
Artery_Aorta	RHOD	11	rs7952436	6.38	rs11227678	-6.04	-5.34023	236	5.34023	9.28e-08	0.001749	TRUE	0.01
Artery_Tibial	CCND1	11	rs7130881	32.14	rs10752567	3.36	-1.5082	492	-10.1	5.87e-24	1.12e-19	TRUE	-0.15
Brain_Amygdala	ORAOV1	11	rs7130881	32.14	rs7118074	-2.7	-8.7255	501	8.73	2.65e-18	4.4e-14	TRUE	0.1
Brain_Amygdala	TPCN2	11	rs7130881	32.14	rs4930667	-2.98	-10.3023	440	7.9	2.72e-15	4.51e-11	TRUE	0.06
Brain_Cerebellum	AP000439.1	11	rs7130881	32.14	rs4980785	3.31	0.875	478	-11.999	3.6e-33	7.12e-29	TRUE	-0.21
Brain_Cerebellum	RP11-554A11.7	11	rs7130881	32.14	rs3750965	2.91	-9.9167	467	-8.22867	1.89e-16	3.74e-12	TRUE	-0.15
Brain_Cerebellum	CDC42EP2	11	rs12146493	5.36	rs2904967	3.96	-4.9268	348	-4.92683	8.36e-07	0.0165294	TRUE	0.02
Brain_Hippocampus	MRGPRF	11	rs7130881	32.14	rs7481750	3.1	7.23846	441	7.24	4.46e-13	7.55e-09	TRUE	0.18
Brain_Hypothalamus	RP11-757G1.6	11	rs7130881	32.14	rs1249528	3.16	3.70175	429	13.2916	2.59e-40	4.51e-36	TRUE	0.24
Brain_Hypothalamus	EHBP1L1	11	rs12146493	5.36	rs629710	-2.3	-4.75806	350	4.75807	1.95e-06	0.0339261	TRUE	-0.03
Brain_Nucleus_accumbens_basal_ganglia	TPCN2	11	rs7130881	32.14	rs2924528	4.23	21.6786	446	21.6786	3.27e-104	5.94e-100	TRUE	0.26
Brain_Putamen_basal_ganglia	MRGPRF	11	rs7130881	32.14	rs3019596	-3.27	0.9219	447	8.67304	4.21e-18	7.23e-14	TRUE	0.06
Brain_Spinal_cord_cervical_c-1	GAL	11	rs12418948	22.07	rs1939734	-3.53	2.79167	394	6.68606	2.29e-11	3.95e-07	TRUE	0.22
Brain_Substantia_nigra	SCGB1D2	11	rs3890102	7.83	rs3890102	3.17	7.8333	440	7.83333	4.75e-15	7.65e-11	TRUE	0.11
Brain_Substantia_nigra	RHOD	11	rs7952436	6.38	rs11227678	-1.83	-5.5165	251	5.51647	3.46e-08	0.000557544	TRUE	0
Breast_Mammary_Tissue	RP11-211G23.2	11	rs7130881	32.14	rs7102705	-3.49	7.13235	488	-12.7	6.11e-37	1.2e-32	TRUE	-0.34
Breast_Mammary_Tissue	RP11-626H12.2	11	rs3862792	9.99	rs678575	2.91	0.5	447	-5.65	1.62e-08	0.000317844	TRUE	0.01
Breast_Mammary_Tissue	FAM89B	11	rs12146493	5.36	rs542332	-2.92	2.66071	354	-5.01	5.31e-07	0.0104182	TRUE	0.02
Breast_Mammary_Tissue	TCIRG1	11	rs308350	4.62	rs308350	-3.33	4.62	277	-4.87	1.14e-06	0.0223668	TRUE	-0.04
Cells_Cultured_fibroblasts	DPF2	11	rs12146493	5.36	rs629710	-6.49	-4.7581	340	4.75806	1.95e-06	0.0351839	TRUE	-0.02
Colon_Sigmoid	GAL	11	rs12418948	22.07	rs17149785	-2.35	-5.13475	399	5.13475	2.83e-07	0.00524937	TRUE	-0.01
Colon_Transverse	TUT1	11	rs3890102	7.83	rs2232937	3.32	-3.6316	382	-6.41884	1.37e-10	2.63e-06	TRUE	-0.16
Colon_Transverse	FTH1	11	rs3890102	7.83	rs10897215	-3.54	5.2364	458	-5.23636	1.64e-07	0.00315323	TRUE	0
Esophagus_Gastroesophageal_Junction	FADS3	11	rs3890102	7.83	rs720889	-2.71	-0.1345	435	5.74387	9.25e-09	0.000170061	TRUE	0.02
Esophagus_Muscularis	TCIRG1	11	rs308350	4.62	rs308350	-5.43	4.62	276	-5.43745	5.4e-08	0.0010341	TRUE	-0.1
Esophagus_Muscularis	CDK2AP2	11	rs7952436	6.38	rs7125210	2.79	-3.39286	242	-5.32389	1.02e-07	0.0019533	TRUE	-0.02
Kidney_Cortex	MAP3K11	11	rs12146493	5.36	rs2306364	3.71	-4.67857	348	-7.05759	1.69e-12	2.72e-08	TRUE	-0.02
Lung	RHOD	11	rs7952436	6.38	rs11227678	-9.39	-5.4552	249	5.45518	4.89e-08	0.0010137	TRUE	-0.01
Muscle_Skeletal	RAD9A	11	rs7952436	6.38	rs7952436	11.4	6.3839	266	5.93362	2.96e-09	5.11e-05	TRUE	0.08
Ovary	MRGPRF-AS1	11	rs7130881	32.14	rs9787877	3.66	-29.1273	436	-29.1273	1.62e-186	2.89e-182	TRUE	-0.33
Pituitary	TESMIN	11	rs7130881	32.14	rs4244843	-3.04	-0.4821	418	15.3205	5.57e-53	1.12e-48	TRUE	0.35
Pituitary	RPLP0P2	11	rs4963459	5.79	rs4963459	2.67	5.7857	346	5.78571	7.22e-09	0.000145606	TRUE	-0.01
Pituitary	RCC2P6	11	rs3890102	7.83	rs11604528	2.83	1.4353	416	4.81873	1.44e-06	0.0290405	TRUE	-0.04
Pituitary	AP000439.1	11	rs7130881	32.14	rs9736587	3.17	0.2581	476	-4.73592	2.18e-06	0.0439641	TRUE	0
Prostate	OVOL1	11	rs12146493	5.36	rs12146493	-2.02	5.35593	333	-5.35593	8.51e-08	0.00162286	TRUE	-0.06
Skin_Sun_Exposed_Lower_leg	OVOL1-AS1	11	rs12146493	5.36	rs7116758	3.89	3.64198	337	6.29001	3.17e-10	6.6e-06	TRUE	0.1
Skin_Sun_Exposed_Lower_leg	SYVN1	11	rs509303	-4.96	rs739390	-4.71	3.87013	332	-5.71881	1.07e-08	0.000222924	TRUE	0.01
Skin_Sun_Exposed_Lower_leg	FADS3	11	rs3890102	7.83	rs12793785	-2.6	2.30556	436	-4.81602	1.46e-06	0.0304176	TRUE	-0.05
Spleen	RHOD	11	rs7952436	6.38	rs11227678	-5.22	-5.35994	249	5.36	8.32e-08	0.00159303	TRUE	0.02
Spleen	FTH1	11	rs3890102	7.83	rs11230882	-2.95	1.66667	458	-5.02	5.1e-07	0.00976497	TRUE	-0.02
Spleen	CABP4	11	rs7952436	6.38	rs11227678	-2.62	-4.90598	239	4.91	9.3e-07	0.0178067	TRUE	0.1
Testis	KRT8P26	11	rs12146493	5.36	rs12146493	4.18	5.3559	331	5.3559	8.51e-08	0.00234612	TRUE	0.03
Thyroid	CPT1A	11	rs7130881	32.14	rs2097042	-3.2	-1.6	424	-6.71847	1.84e-11	3.95e-07	TRUE	-0.2
Thyroid	BEST1	11	rs3890102	7.83	rs580089	2.2	0.68	455	-5.15537	2.53e-07	0.00543292	TRUE	-0.03
Uterus	MYEOV	11	rs7130881	32.14	rs3884627	3.41	-19.7541	458	-18.1	7.16e-73	1.22e-68	TRUE	-0.29
Heart_Left_Ventricle	CLNS1A	11	rs12796422	5.09	rs1790256	-2.28	4.98214	361	-4.98214	6.29e-07	0.0102294	TRUE	0
Brain_Anterior_cingulate_cortex_BA24	BIRC2	11	rs11568818	-12.02	rs7119077	-2.93	3.1304	506	-4.75434	1.99e-06	0.0341345	TRUE	0.23
Cells_EBV-transformed_lymphocytes	MMP20	11	rs11568818	-12.02	rs11225308	-2.52	7.24242	517	-7.2424	4.41e-13	6.99e-09	TRUE	0.19
Testis	MMP20	11	rs11568818	-12.02	rs2408406	-4.57	5.1429	516	-5.1997	2e-07	0.0055138	TRUE	0.07
Adrenal_Gland	DRD2	11	rs11214775	-9.92	rs11214786	-3.37	-6.225	522	6.225	4.82e-10	8.52e-06	TRUE	-0.23
Brain_Caudate_basal_ganglia	ANKK1	11	rs2465647	-8.18	rs11607834	-3.27	6.0233	503	-6.02326	1.71e-09	3.09e-05	TRUE	0.05
Brain_Caudate_basal_ganglia	RP11-839D17.3	11	rs2465647	-8.18	rs6589371	2.79	-0.5181	512	-5.53565	3.1e-08	0.00056048	TRUE	0.47
Brain_Nucleus_accumbens_basal_ganglia	HTR3A	11	rs11214775	-9.92	rs11214786	-3.53	-6.225	580	6.225	4.82e-10	8.76e-06	TRUE	-0.76
Brain_Putamen_basal_ganglia	EXPH5	11	rs1800056	7.02	rs4987876	-3.5	6.1158	345	-6.15963	7.29e-10	1.25e-05	TRUE	0.01
Brain_Substantia_nigra	HTR3B	11	rs11214775	-9.92	rs17116121	3.05	4.2245	565	5.82704	5.64e-09	9.09e-05	TRUE	-0.17
Colon_Transverse	NCAM1-AS1	11	rs11601037	-7.57	rs10891585	3.51	-5.1964	528	-5.19643	2.03e-07	0.00390308	TRUE	0.56
Liver	ZW10	11	rs11214775	-9.92	rs10891585	3.22	-5.19643	576	-8.6995	3.33e-18	5.3e-14	TRUE	0.59
Minor_Salivary_Gland	ZBTB16	11	rs11214775	-9.92	rs10891585	-2.92	-5.19643	552	5.19643	2.03e-07	0.0035795	TRUE	-0.56
Ovary	RAB39A	11	rs1800056	7.02	rs1800056	2.67	7.0174	406	4.75708	1.96e-06	0.0349605	TRUE	-0.01
Prostate	NPAT	11	rs10431061	6.27	rs4987876	3.49	6.11579	353	4.9488	7.47e-07	0.0142453	TRUE	0.01
Skin_Not_Sun_Exposed_Suprapubic	ATM	11	rs1800056	7.02	rs228606	3.42	5.89286	345	5.89286	3.8e-09	7.75e-05	TRUE	0.06
Skin_Sun_Exposed_Lower_leg	FDXACB1	11	rs564601	6.18	rs648544	3.82	-4.35088	339	-6.18909	6.05e-10	1.26e-05	TRUE	0.03
Spleen	RAB39A	11	rs1800056	7.02	rs1800056	2.45	7.01739	400	7.02	2.26e-12	4.33e-08	TRUE	-0.03
Thyroid	USP28	11	rs11214775	-9.92	rs12801945	-4	3.8105	584	-7.75754	8.66e-15	1.86e-10	TRUE	0.39
Thyroid	ATF4P4	11	rs11214775	-9.92	rs10891611	-2.44	-5.5195	575	5.51948	3.4e-08	0.000730116	TRUE	-0.23
Esophagus_Muscularis	TREH	11	rs894678	3.6	rs476246	2.55	-2.44068	397	-5.30949	1.1e-07	0.0021065	TRUE	-0.34
Artery_Aorta	HIST4H4	12	rs764493	-7.77	rs11056121	-3.44	-7.7385	371	7.73846	1.01e-14	1.9e-10	TRUE	-0.18
Artery_Aorta	GPR19	12	rs2066827	-6	rs17758597	3.78	-4.8586	468	-4.85859	1.18e-06	0.0222395	TRUE	-0.09
Brain_Cortex	RP11-174G6.5	12	rs11055891	-9.47	rs16910259	-3.66	-6.6667	372	4.82	1.41e-06	0.0261795	TRUE	-0.13
Brain_Hypothalamus	RP11-174G6.5	12	rs11055891	-9.47	rs17761801	-4.72	-6.44928	372	6.44928	1.12e-10	1.95e-06	TRUE	-0.18
Brain_Nucleus_accumbens_basal_ganglia	RPL13AP20	12	rs2066827	-6	rs2066827	2.86	-6	557	-6	1.97e-09	3.58e-05	TRUE	0.02
Brain_Spinal_cord_cervical_c-1	WBP11	12	rs764493	-7.77	rs11614445	-3.04	-6.62857	370	6.63	3.39e-11	5.85e-07	TRUE	-0.09
Colon_Transverse	GPR19	12	rs2066827	-6	rs10492237	4.56	-4.8617	471	-4.8617	1.16e-06	0.0223033	TRUE	0.02
Heart_Atrial_Appendage	WBP11	12	rs764493	-7.77	rs17761801	-5.19	-6.4493	366	5.9794	2.24e-09	4.03e-05	TRUE	-0.14
Kidney_Cortex	RPL13AP20	12	rs2066827	-6	rs17758597	2.82	-4.8586	552	-4.85859	1.18e-06	0.0190204	TRUE	-0.02
Lung	GPR19	12	rs2066827	-6	rs10492237	6.167	-4.8617	469	-4.8617	1.16e-06	0.0240468	TRUE	0.03
Skin_Not_Sun_Exposed_Suprapubic	GPR19	12	rs2066827	-6	rs17758597	4.5	-4.85859	468	-4.85859	1.18e-06	0.0240791	TRUE	0.03
Spleen	GPR19	12	rs2066827	-6	rs17758597	7.28	-4.85859	470	-5.14	2.73e-07	0.00522713	TRUE	-0.06
Testis	WBP11	12	rs764493	-7.77	rs11614445	5.824	-6.6286	368	-6.63	3.39e-11	9.35e-07	TRUE	0.18
Testis	H2AFJ	12	rs764493	-7.77	rs6488711	-5.019	6.2222	370	-6.22	4.9e-10	1.35e-05	TRUE	-0.06
Testis	GPR19	12	rs2066827	-6	rs17758597	6.67	-4.8586	471	-4.86	1.18e-06	0.0325314	TRUE	-0.12
Thyroid	GPR19	12	rs2066827	-6	rs17758597	5.86	-4.8586	469	-4.92193	8.57e-07	0.0184032	TRUE	-0.1
Uterus	GUCY2C	12	rs10845938	-10.36	rs12578518	2.88	7.44643	372	7.44643	9.59e-14	1.63e-09	TRUE	-0.71
Uterus	WBP11	12	rs764493	-7.77	rs2042841	-3.76	-6.01724	363	7.38924	1.48e-13	2.52e-09	TRUE	-0.2
Adipose_Subcutaneous	RP11-983P16.2	12	rs4919743	20.98	rs10747658	4.26	-1.375	591	12.149	5.8e-34	1.17e-29	TRUE	0.67
Adipose_Subcutaneous	KRT6A	12	rs4919743	20.98	rs1574409	-3.11	0.9865	803	-5.07254	3.93e-07	0.00790284	TRUE	-0.3
Adrenal_Gland	PFDN5	12	rs4919743	20.98	rs9668186	-3	-8.93443	421	8.93443	4.09e-19	7.23e-15	TRUE	0.16
Artery_Coronary	RP11-680A11.5	12	rs4919743	20.98	rs1994755	-2.76	-5.69492	420	5.69492	1.23e-08	0.000216849	TRUE	-0.02
Brain_Anterior_cingulate_cortex_BA24	RP11-386G11.5	12	rs10875943	12.82	rs11168936	-3.44	11.9825	319	-8.61332	7.1e-18	1.22e-13	TRUE	0.03
Brain_Anterior_cingulate_cortex_BA24	PCBP2	12	rs727266	10.01	rs11170488	-3.22	-0.68657	405	-4.91395	8.93e-07	0.0153176	TRUE	-0.21
Brain_Cerebellar_Hemisphere	RP11-386G11.10	12	rs10875943	12.82	rs7959497	-6.47	8.4211	307	-7.54404	4.56e-14	8.6e-10	TRUE	0
Brain_Cerebellar_Hemisphere	ASB8	12	rs17122571	-8.21	rs10875746	5.61	5	516	5	5.73e-07	0.0108114	TRUE	-0.01
Brain_Cortex	KRT2	12	rs4919743	20.98	rs10876333	3.54	-2.4286	797	-4.82	1.45e-06	0.0269221	TRUE	0.04
Brain_Frontal_Cortex_BA9	TUBA1A	12	rs10875943	12.82	rs10875943	-3.19	12.8167	299	-12.8195	1.27e-37	2.26e-33	TRUE	0.08
Brain_Hypothalamus	VDR	12	rs17122571	-8.21	rs7305180	-2.87	5.32877	513	-5.32877	9.89e-08	0.00172066	TRUE	0.01
Brain_Putamen_basal_ganglia	KRT18	12	rs4919743	20.98	rs2035876	4.01	-9.5254	615	-9.53	1.64e-21	2.82e-17	TRUE	-0.09
Colon_Sigmoid	KRT8	12	rs4919743	20.98	rs7133528	-3.88	-10.1724	612	6.33575	2.36e-10	4.38e-06	TRUE	-0.03
Esophagus_Gastroesophageal_Junction	RP1-228P16.1	12	rs17122571	-8.21	rs886588	-9.36	5.48529	522	-5.32631	1e-07	0.0018385	TRUE	0.01
Heart_Atrial_Appendage	SOAT2	12	rs4919743	20.98	rs2280699	-3.21	-2.2571	512	11.2725	1.79e-29	3.22e-25	TRUE	0.4
Heart_Atrial_Appendage	GPD1	12	rs7963954	5.33	rs35275181	-2.92	2.4476	305	-5.1304	2.89e-07	0.00519709	TRUE	0.07
Heart_Atrial_Appendage	RP11-370I10.12	12	rs17122571	-8.21	rs2732439	-5.29	-1.1786	519	4.7063	2.52e-06	0.0453172	TRUE	0.02
Lung	KRT8	12	rs4919743	20.98	rs11170341	2.513	13.8551	614	13.8551	1.19e-43	2.47e-39	TRUE	0.29
Minor_Salivary_Gland	KRT76	12	rs4919743	20.98	rs11829997	3.42	17.4062	748	17.4062	7.4e-68	1.3e-63	TRUE	0.17
Minor_Salivary_Gland	KRT3	12	rs4919743	20.98	rs11829997	3.1	17.4062	742	12.2184	2.48e-34	4.37e-30	TRUE	0.53
Minor_Salivary_Gland	PRPH	12	rs10875943	12.82	rs11168936	-1.76	11.9825	294	-11.9825	4.39e-33	7.74e-29	TRUE	-0.01
Minor_Salivary_Gland	KRT74	12	rs4919743	20.98	rs3905761	3.27	1.42857	803	5.01537	5.29e-07	0.00932786	TRUE	0.2
Minor_Salivary_Gland	TNS2	12	rs4919743	20.98	rs7133528	3.29	-10.1724	561	-4.83661	1.32e-06	0.0232756	TRUE	-0.16
Nerve_Tibial	SP7	12	rs4919743	20.98	rs902774	-3.53	17.2933	400	-17.3	5.28e-67	1.12e-62	TRUE	-0.29
Ovary	RP11-370I10.10	12	rs17122571	-8.21	rs17122571	3.38	-8.21	480	-8.21	2.21e-16	3.94e-12	TRUE	0
Skin_Not_Sun_Exposed_Suprapubic	KRT78	12	rs4919743	20.98	rs872461	-3.03	-3.41958	697	6.11752	9.5e-10	1.94e-05	TRUE	0.32
Skin_Sun_Exposed_Lower_leg	CCNT1	12	rs10875935	8.84	rs2087343	-3.56	-7.6733	355	7.67327	1.68e-14	3.5e-10	TRUE	0.04
Small_Intestine_Terminal_Ileum	RP11-370I10.10	12	rs17122571	-8.21	rs17122571	3.901	-8.21	486	-8.21	2.21e-16	4.05e-12	TRUE	0.01
Small_Intestine_Terminal_Ileum	PFDN5	12	rs4919743	20.98	rs1552754	2.517	4.7818	419	4.78182	1.74e-06	0.031889	TRUE	0.07
Spleen	KRT6C	12	rs4919743	20.98	rs11829997	3.68	17.4062	805	17.4	7.4e-68	1.42e-63	TRUE	0.22
Spleen	TMEM106C	12	rs17122571	-8.21	rs7964582	-3.7	-4.94828	511	4.95	7.49e-07	0.0143411	TRUE	0.01
Uterus	TNS2	12	rs4919743	20.98	rs17119107	-3.32	-1.87333	562	6.53156	6.51e-11	1.11e-06	TRUE	0.06
Vagina	LMBR1L	12	rs10875943	12.82	rs7959497	-3.11	8.4211	312	-8.42105	3.73e-17	6.5e-13	TRUE	0.06
Vagina	C1QL4	12	rs10875943	12.82	rs1039225	2.88	7.7069	294	7.56961	3.74e-14	6.52e-10	TRUE	-0.01
Vagina	CACNB3	12	rs10875943	12.82	rs7139233	2.86	5.4297	345	6.65211	2.89e-11	5.04e-07	TRUE	-0.07
Adipose_Visceral_Omentum	RASSF3	12	rs1147107	-9.62	rs1147098	3.38	7.08929	332	7.08929	1.35e-12	2.61e-08	TRUE	-0.35
Stomach	C12orf66	12	rs1147107	-9.62	rs3888051	-3.05	1.17857	323	-5.16839	2.36e-07	0.00422086	TRUE	0.2
Adipose_Subcutaneous	GALNT4	12	rs10777196	-10.54	rs770369	3.24	-0.7414	356	-5.02365	5.07e-07	0.0101953	TRUE	0.35
Adipose_Subcutaneous	DUSP6	12	rs10777196	-10.54	rs4842644	3.06	0.3435	352	-5.02223	5.11e-07	0.0102757	TRUE	0.34
Brain_Putamen_basal_ganglia	RP11-567C2.1	12	rs10777196	-10.54	rs1405780	2.82	-6.9474	335	-6.95	3.72e-12	6.39e-08	TRUE	0.11
Brain_Putamen_basal_ganglia	GALNT4	12	rs10777196	-10.54	rs957525	-2.85	0.7705	355	-4.72	2.38e-06	0.040867	TRUE	0.46
Brain_Substantia_nigra	ATP2B1-AS1	12	rs10777196	-10.54	rs10858942	-2.54	5.48214	349	-5.65369	1.57e-08	0.00025299	TRUE	0.35
Pituitary	GALNT4	12	rs10777196	-10.54	rs4842705	-4.48	-2.8772	356	4.76859	1.86e-06	0.0375106	TRUE	-0.21
Prostate	ATP2B1-AS1	12	rs10777196	-10.54	rs7978615	-2.72	-0.0492	349	5.99211	2.07e-09	3.95e-05	TRUE	-0.42
Brain_Cerebellar_Hemisphere	ASCL1	12	rs7956547	6.05	rs5742632	-2.31	4.8281	445	-4.82812	1.38e-06	0.0260378	TRUE	-0.07
Brain_Caudate_basal_ganglia	TBX3	12	rs10774740	-13.39	rs1270886	-3.52	-11.2	568	11.8	3.06e-32	5.53e-28	TRUE	-0.54
Brain_Cerebellum	GPN3	12	rs10400410	5.17	rs11837455	2.96	3.39474	248	5.49519	3.9e-08	0.000771108	TRUE	-0.09
Cells_EBV-transformed_lymphocytes	FAM222A	12	rs3825393	5.37	rs7953327	-2.53	-4.88	381	4.88	1.06e-06	0.016801	TRUE	-0.09
Colon_Sigmoid	KCTD10	12	rs3825393	5.37	rs888192	6.55	4.87273	427	4.9586	7.1e-07	0.0131698	TRUE	0.04
Colon_Transverse	DYNLL1P4	12	rs10774740	-13.39	rs4767235	-3.18	-8.0704	589	8.07042	7.01e-16	1.35e-11	TRUE	-0.47
Heart_Atrial_Appendage	IFT81	12	rs7956963	4.66	rs11613412	-2.98	2.5	268	-6.04	1.54e-09	2.77e-05	TRUE	0.07
Heart_Atrial_Appendage	PPTC7	12	rs10400410	5.17	rs10400410	1.93	5.1684	217	5.1684	2.36e-07	0.00424399	TRUE	-0.08
Heart_Left_Ventricle	RP11-946P6.6	12	rs7953327	-4.88	rs7953327	-2.4	-4.88	297	4.88	1.06e-06	0.0172388	TRUE	-0.02
Kidney_Cortex	PPTC7	12	rs10400410	5.17	rs1547975	2.17	0.5714	214	5.28047	1.29e-07	0.00207935	TRUE	-0.06
Prostate	KCTD10	12	rs3825393	5.37	rs3825393	5.56	5.3729	427	5.37288	7.75e-08	0.00147792	TRUE	0.05
Skin_Sun_Exposed_Lower_leg	TBX3	12	rs10774740	-13.39	rs484443	4.17	5.2679	569	5.26786	1.38e-07	0.00287509	TRUE	0.01
Testis	TBX3	12	rs10774740	-13.39	rs11066995	-3.666	-9.8116	569	9.81	1e-22	2.76e-18	TRUE	-0.43
Testis	RP11-100F15.1	12	rs10774740	-13.39	rs12423389	-3.482	2.25	653	-7.56	3.99e-14	1.1e-09	TRUE	0.49
Vagina	TBX5-AS1	12	rs10774740	-13.39	rs2701108	3.48	-9.9643	582	-9.96429	2.18e-23	3.8e-19	TRUE	0.23
Brain_Caudate_basal_ganglia	RP11-33N14.3	12	rs5745870	-5.87	rs5745870	-3.58	-5.86667	553	5.87	4.45e-09	8.05e-05	TRUE	-0.64
Stomach	ZNF664	12	rs1268892	-4.07	rs1268891	-2.84	-1.56923	427	4.79593	1.62e-06	0.0289737	TRUE	-0.18
Adipose_Visceral_Omentum	FBRSL1	12	rs10870464	8.56	rs2323982	3.82	7.72131	324	7.72131	1.15e-14	2.23e-10	TRUE	0.5
Brain_Anterior_cingulate_cortex_BA24	ZNF84	12	rs10870464	8.56	rs11146953	-2.34	6.68421	193	-6.68421	2.32e-11	3.98e-07	TRUE	-0.52
Brain_Hippocampus	RP13-895J2.6	12	rs10870464	8.56	rs11146953	-3.72	6.68421	327	-6.68421	2.32e-11	3.93e-07	TRUE	-0.56
Brain_Hippocampus	RP11-386I8.6	12	rs10870464	8.56	rs11146953	2.36	6.68421	194	6.47317	9.6e-11	1.63e-06	TRUE	0.72
Cells_Cultured_fibroblasts	FBRSL1	12	rs10870464	8.56	rs11146950	-4.19	-4.0317	322	6.57023	5.02e-11	9.06e-07	TRUE	0.59
Cells_EBV-transformed_lymphocytes	FBRSL1	12	rs10870464	8.56	rs4883520	5.14	8.5246	324	8.52459	1.53e-17	2.43e-13	TRUE	0.71
Thyroid	PXMP2	12	rs10870464	8.56	rs11146953	2.53	6.6842	270	6.68421	2.32e-11	4.98e-07	TRUE	0.27
Brain_Caudate_basal_ganglia	ST13P4	13	rs9526671	-7.16	rs201762	-3.48	5.5385	390	-5.1293	2.91e-07	0.00526128	TRUE	0.19
Brain_Frontal_Cortex_BA9	DLEU2	13	rs9526671	-7.16	rs706617	-3.17	1.38793	388	-5.95885	2.54e-09	4.51e-05	TRUE	0.3
Brain_Spinal_cord_cervical_c-1	DLEU2	13	rs9526671	-7.16	rs2225227	-2.15	-6.0198	388	6.0198	1.75e-09	3.02e-05	TRUE	-0.26
Kidney_Cortex	RP11-34F20.7	13	rs9526671	-7.16	rs3116599	3.06	4.8939	389	5.1105	3.21e-07	0.0051742	TRUE	-0.25
Muscle_Skeletal	SPRYD7	13	rs3118648	-5.51	rs12876820	2.49	-4.7143	406	-4.71429	2.43e-06	0.0419855	TRUE	0.05
Pancreas	ST13P4	13	rs9526671	-7.16	rs3116594	-2.69	-5.48	391	5.48	4.25e-08	0.00073525	TRUE	-0.42
Spleen	SPRYD7	13	rs3118648	-5.51	rs12872335	3.15	-4.7571	406	-4.75714	1.96e-06	0.0375281	TRUE	0.14
Artery_Tibial	KLF5	13	rs4242949	10.44	rs17287088	-7.02	5.0345	509	-6.1644	7.07e-10	1.34e-05	TRUE	-0.19
Brain_Hypothalamus	BORA	13	rs4242949	10.44	rs7327286	4.12	10.3662	513	10.3662	3.53e-25	6.14e-21	TRUE	0.49
Cells_EBV-transformed_lymphocytes	KLF5	13	rs4242949	10.44	rs1571556	2.78	6.2787	506	6.27869	3.41e-10	5.4e-06	TRUE	0.02
Esophagus_Gastroesophageal_Junction	LMO7-AS1	13	rs7988372	-5.55	rs9593109	9.84	5.0714	561	5.46943	4.51e-08	0.000829164	TRUE	0.01
Stomach	SOX21-AS1	13	rs17189390	-4.96	rs17268129	-3.5	-4.91579	697	4.91579	8.84e-07	0.0158103	TRUE	-0.41
Breast_Mammary_Tissue	IRS2	13	rs9521382	6.7	rs1328247	-3.14	5.2429	603	-5.24286	1.58e-07	0.00309996	TRUE	-0.54
Adrenal_Gland	MMP14	14	rs8021195	5.15	rs762052	4.44	3.25	556	6.09334	1.11e-09	1.96e-05	TRUE	0.11
Artery_Tibial	RP11-298I3.4	14	rs8021195	5.15	rs1242631	-3.36	-0.2695	548	-6.18415	6.24e-10	1.19e-05	TRUE	-0.68
Brain_Caudate_basal_ganglia	CDH24	14	rs8021195	5.15	rs17122962	2.16	4.8427	518	4.8427	1.28e-06	0.0231424	TRUE	-0.33
Brain_Putamen_basal_ganglia	RP11-298I3.1	14	rs8021195	5.15	rs1043209	-4.84	4.8929	572	-4.8706	1.11e-06	0.0190598	TRUE	-0.66
Brain_Substantia_nigra	BCL2L2-PABPN1	14	rs8021195	5.15	rs17122962	3.92	4.8427	460	4.74362	2.1e-06	0.0338394	TRUE	0.05
Cells_Cultured_fibroblasts	HAUS4	14	rs8021195	5.15	rs2145542	13.29	5.0727	565	4.8766	1.08e-06	0.0194864	TRUE	0.67
Heart_Atrial_Appendage	NGDN	14	rs8021195	5.15	rs8021195	-3.22	5.1455	461	-5.14545	2.67e-07	0.00480146	TRUE	-0.41
Minor_Salivary_Gland	C14orf119	14	rs8021195	5.15	rs3729814	2.81	0.52381	481	5.0439	4.56e-07	0.00804065	TRUE	0.51
Minor_Salivary_Gland	RBM23	14	rs8021195	5.15	rs2295680	-3.95	4.87273	570	-4.87273	1.1e-06	0.0193963	TRUE	-0.58
Muscle_Skeletal	LRP10	14	rs8021195	5.15	rs941717	-3.32	4.8036	565	-4.80357	1.56e-06	0.0269537	TRUE	-0.73
Stomach	MRPL52	14	rs8021195	5.15	rs3751488	3.8	-4.7576	561	-4.7576	1.96e-06	0.0350546	TRUE	-0.15
Brain_Amygdala	NKX2-1-AS1	14	rs2236007	7.82	rs17104698	2.44	-6.33333	586	-6.33333	2.4e-10	3.98e-06	TRUE	-0.16
Brain_Nucleus_accumbens_basal_ganglia	PAX9	14	rs2236007	7.82	rs7143398	3.84	6.2143	579	6.2143	5.16e-10	9.38e-06	TRUE	0.44
Brain_Substantia_nigra	RP11-259K15.2	14	rs2236007	7.82	rs12883049	3.11	6.5538	486	6.55385	5.61e-11	9.04e-07	TRUE	0.35
Breast_Mammary_Tissue	SLC25A21	14	rs2236007	7.82	rs7143872	3.68	-2.86667	542	-5.30544	1.12e-07	0.00219744	TRUE	-0.01
Pancreas	RP11-356O9.1	14	rs12892785	5.26	rs11627844	-3.72	-4.98387	311	4.80983	1.51e-06	0.026123	TRUE	-0.08
Pancreas	MIPOL1	14	rs11627844	-4.98	rs7151191	-8.52	-3.01562	461	4.67826	2.89e-06	0.049997	TRUE	-0.06
Pituitary	SFTA3	14	rs2236007	7.82	rs8004187	3.68	-7.6034	588	-7.60345	2.88e-14	5.81e-10	TRUE	-0.3
Stomach	TTC6	14	rs12892785	5.26	rs12892785	3.21	5.2636	317	5.2636	1.41e-07	0.00252178	TRUE	0.02
Thyroid	PAX9	14	rs2236007	7.82	rs1018464	8.88	6.7344	581	6.22916	4.69e-10	1.01e-05	TRUE	0.7
Uterus	SLC25A21	14	rs2236007	7.82	rs1951169	2.137	4.931	548	4.93103	8.18e-07	0.013924	TRUE	0.33
Adipose_Subcutaneous	GNPNAT1	14	rs8008270	-11.36	rs12433887	2.76	-5.5902	325	-5.59016	2.27e-08	0.000456474	TRUE	0.11
Artery_Tibial	GNPNAT1	14	rs8008270	-11.36	rs17125944	3.61	5.7895	325	5.78947	7.06e-09	0.000134168	TRUE	-0.05
Brain_Cerebellar_Hemisphere	ERO1A	14	rs8008270	-11.36	rs12883648	4.02	-6.3455	362	-5.81613	6.02e-09	0.000113585	TRUE	0.42
Brain_Nucleus_accumbens_basal_ganglia	FERMT2	14	rs8008270	-11.36	rs11626437	-3.24	2.2131	358	-7.1813	6.91e-13	1.26e-08	TRUE	0.53
Liver	FERMT2	14	rs8008270	-11.36	rs2357947	-2.8	5.39326	355	-5.39326	6.92e-08	0.00110222	TRUE	0.07
Muscle_Skeletal	RP11-248J18.3	14	rs10483610	4.87	rs10483610	-3.74	4.8689	470	-4.86885	1.12e-06	0.0193514	TRUE	-0.1
Skin_Sun_Exposed_Lower_leg	FERMT2	14	rs8008270	-11.36	rs4898765	2.71	-5.1636	358	-5.16	2.42e-07	0.00504183	TRUE	0.22
Spleen	RP11-589M4.4	14	rs8008270	-11.36	rs12434179	1.7	6.0323	342	6.03226	1.62e-09	3.1e-05	TRUE	0.04
Stomach	GNPNAT1	14	rs8008270	-11.36	rs2884343	-3.14	-4.9298	325	4.9298	8.23e-07	0.0147194	TRUE	-0.22
Stomach	SAV1	14	rs10483610	4.87	rs10483610	-4.06	4.8689	468	-4.8689	1.12e-06	0.0200312	TRUE	-0.01
Testis	TBPL2	14	rs8003961	-4.46	rs7150285	-3.36	-3.1897	449	4.82379	1.41e-06	0.0388723	TRUE	0.01
Brain_Caudate_basal_ganglia	SLC38A6	14	rs10139853	7.68	rs2020892	-2.67	-3.8	331	6.76715	1.31e-11	2.37e-07	TRUE	0.74
Brain_Cortex	TRMT5	14	rs10139853	7.68	rs4457900	2.92	-4.871	328	-4.87097	1.11e-06	0.0206094	TRUE	0.03
Brain_Frontal_Cortex_BA9	PPM1A	14	rs10139853	7.68	rs10151922	3.95	4.97368	281	4.97368	6.57e-07	0.0116683	TRUE	0.4
Brain_Hippocampus	TMEM30B	14	rs2300466	7.64	rs12432218	4.16	-6.9661	412	-6.9661	3.26e-12	5.52e-08	TRUE	-0.19
Brain_Putamen_basal_ganglia	SIX4	14	rs10139853	7.68	rs4151351	-2.89	-1.1096	265	5.65796	1.53e-08	0.000262716	TRUE	0.45
Cells_EBV-transformed_lymphocytes	CTD-2184C24.2	14	rs10139853	7.68	rs9671845	-1.732	7.6774	279	-7.67742	1.62e-14	2.57e-10	TRUE	-0.16
Esophagus_Gastroesophageal_Junction	SIX4	14	rs10139853	7.68	rs7152548	-2.86	5.5048	224	-5.50476	3.7e-08	0.000680245	TRUE	-0.44
Uterus	RP11-902B17.1	14	rs2882684	7.58	rs2149295	2.245	-5.5439	403	-5.54386	2.96e-08	0.000503851	TRUE	0.05
Brain_Cerebellum	ZFP36L1	14	rs767127	8.3	rs7151159	3.42	0.7959	617	5.68287	1.32e-08	0.00026099	TRUE	0.02
Brain_Hypothalamus	CTD-2540L5.6	14	rs17565772	7.18	rs1205236	3.27	1.50847	430	5.13536	2.82e-07	0.00490624	TRUE	0.04
Brain_Nucleus_accumbens_basal_ganglia	RP11-486O13.5	14	rs17565772	7.18	rs10145919	3.43	-5.0169	535	-5.0169	5.25e-07	0.0095403	TRUE	-0.06
Brain_Spinal_cord_cervical_c-1	HMGN1P3	14	rs767127	8.3	rs9323508	-3.69	5.1818	628	-5.1818	2.2e-07	0.0037972	TRUE	0.04
Esophagus_Gastroesophageal_Junction	ADAM21	14	rs17565772	7.18	rs10483832	-3.76	-4.3765	520	4.97707	6.46e-07	0.0118767	TRUE	0.07
Heart_Atrial_Appendage	NT5CP1	14	rs8006497	4.87	rs8006497	3.37	4.8689	363	4.86885	1.12e-06	0.020141	TRUE	-0.07
Liver	HMGN1P3	14	rs767127	8.3	rs2877498	-2.75	-5.50746	630	5.50746	3.64e-08	0.000579779	TRUE	0.21
Minor_Salivary_Gland	DDX18P1	14	rs767127	8.3	rs17106118	-2.94	-5.9359	579	5.9359	2.92e-09	5.15e-05	TRUE	0.08
Muscle_Skeletal	RP11-486O13.5	14	rs17565772	7.18	rs1834426	-5.11	6.4821	536	-6.48214	9.04e-11	1.56e-06	TRUE	-0.1
Pancreas	DDX18P1	14	rs767127	8.3	rs2331780	-3.24	5.13235	581	-5.13235	2.86e-07	0.0049478	TRUE	0.01
Small_Intestine_Terminal_Ileum	SYNJ2BP	14	rs17565772	7.18	rs17565772	4.39	7.1786	546	7.1786	7.04e-13	1.29e-08	TRUE	0.07
Spleen	RPS6KL1	14	rs3213716	5.65	rs3213716	7.1	5.6491	376	5.80046	6.61e-09	0.000126562	TRUE	-0.1
Spleen	SYNJ2BP	14	rs17565772	7.18	rs6573971	6.58	5.1964	550	5.19643	2.03e-07	0.00388684	TRUE	0.08
Testis	ADAM20	14	rs17565772	7.18	rs17565772	-4.26	7.1786	481	-7.17857	7.04e-13	1.94e-08	TRUE	-0.08
Thyroid	SRSF5	14	rs1834426	6.48	rs1571376	-2.48	-5.15	527	5.15	2.6e-07	0.00558324	TRUE	-0.03
Whole_Blood	CTD-2325P2.3	14	rs767127	8.3	rs2180611	3.43	3.75439	605	7.95759	1.75e-15	2.85e-11	TRUE	0.33
Brain_Caudate_basal_ganglia	CCDC88C	14	rs12884117	-5.8	rs12884117	-3.26	-5.8	392	5.8	6.63e-09	0.00011987	TRUE	-0.33
Brain_Cerebellar_Hemisphere	CTD-3035D6.1	14	rs10873406	-4.78	rs10873406	3.78	-4.7778	392	-4.77778	1.77e-06	0.0333964	TRUE	0.09
Cells_EBV-transformed_lymphocytes	RP11-895M11.3	14	rs12884117	-5.8	rs3825658	-3.681	-5.0227	391	5.02273	5.09e-07	0.00806765	TRUE	-0.13
Liver	MOAP1	14	rs12586382	4.9	rs12586382	-3.38	4.89535	383	-4.89535	9.81e-07	0.0156254	TRUE	0.03
Ovary	PPP4R3A	14	rs12884117	-5.8	rs12884117	2.35	-5.8	412	-5.8	6.63e-09	0.000118259	TRUE	0.19
Skin_Sun_Exposed_Lower_leg	SERPINA3	14	rs12889978	-5.54	rs7151768	-3.05	3.8594	778	-4.98	6.37e-07	0.0132713	TRUE	0.01
Thyroid	C14orf159	14	rs12884117	-5.8	rs3825658	-3.89	-5.0227	398	5.02273	5.09e-07	0.0109303	TRUE	0.02
Thyroid	CTD-2547L24.4	14	rs12884117	-5.8	rs3825658	-2.78	-5.0227	379	5.02273	5.09e-07	0.0109303	TRUE	0.05
Whole_Blood	SERPINA12	14	rs12889978	-5.54	rs7146876	-3.52	-4.72857	785	4.72857	2.26e-06	0.0367544	TRUE	-0.07
Brain_Putamen_basal_ganglia	RP11-736N17.11	14	rs34955690	-5.11	rs11844761	3.72	-3.8657	343	-5.61903	1.92e-08	0.000329683	TRUE	0.02
Thyroid	SIVA1	14	rs35590716	4.41	rs4983539	-5.08	3.8571	369	-4.93421	8.05e-07	0.0172866	TRUE	-0.04
Artery_Tibial	RP11-35O15.2	15	rs4966009	5.82	rs4966008	-4.01	5.7895	621	-5.78947	7.06e-09	0.000134168	TRUE	-0.39
Cells_Cultured_fibroblasts	CHSY1	15	rs8043243	-5.55	rs8028597	-7.04	4.75	621	-5.57497	2.48e-08	0.000447466	TRUE	0.02
Pituitary	RP11-35O15.2	15	rs4966009	5.82	rs6598537	-4.036	5.0702	620	-5.07017	3.97e-07	0.0080063	TRUE	-0.52
Skin_Not_Sun_Exposed_Suprapubic	RP11-35O15.2	15	rs4966009	5.82	rs4966009	-4.386	5.82456	620	-5.82456	5.73e-09	0.000116926	TRUE	-0.44
Whole_Blood	RP11-35O15.2	15	rs4966009	5.82	rs4966008	-3.77	5.7895	621	-5.78947	7.06e-09	0.000114817	TRUE	-0.39
Brain_Frontal_Cortex_BA9	RP11-1000B6.8	15	rs922510	6.83	rs1840400	2.28	6.7377	402	6.7377	1.61e-11	2.86e-07	TRUE	0.34
Brain_Nucleus_accumbens_basal_ganglia	RP11-133K1.9	15	rs7171260	-7.2	rs12901892	-2.76	0.5964	408	4.8467	1.26e-06	0.0228967	TRUE	-0.51
Breast_Mammary_Tissue	BMF	15	rs7171260	-7.2	rs8042729	2.805	-6.38462	453	-6.38	1.72e-10	3.37e-06	TRUE	0.25
Esophagus_Gastroesophageal_Junction	FAM92A1P1	15	rs2619681	-7.12	rs2304580	2.029	-7.0267	266	-7.02667	2.12e-12	3.9e-08	TRUE	0.32
Kidney_Cortex	RP11-64K12.8	15	rs7171260	-7.2	rs8042729	-3.43	-6.3846	374	6.38462	1.72e-10	2.77e-06	TRUE	-0.64
Pituitary	BUB1B	15	rs7171260	-7.2	rs7167417	3.927	-7.1867	445	-7.18667	6.64e-13	1.34e-08	TRUE	0.57
Testis	INAFM2	15	rs7171260	-7.2	rs11070256	3.296	1.29167	399	5.36751	7.98e-08	0.00220001	TRUE	-0.45
Thyroid	RP11-133K1.9	15	rs7171260	-7.2	rs1017843	-2.83	0.8393	409	4.98511	6.19e-07	0.0132924	TRUE	-0.43
Adrenal_Gland	MYO5C	15	rs12594710	5.49	rs12594710	5.94	5.4921	375	5.49206	3.97e-08	0.000701499	TRUE	0.31
Brain_Cerebellar_Hemisphere	MYO5C	15	rs12594710	5.49	rs12594710	3.22	5.4921	382	5.49206	3.97e-08	0.00074906	TRUE	0.24
Uterus	MYO5C	15	rs12594710	5.49	rs12594710	3.19	5.4921	380	5.49206	3.97e-08	0.000675773	TRUE	0.39
Brain_Amygdala	PRTG	15	rs530798	-5.37	rs1550326	2.52	5.1724	389	5.17241	2.31e-07	0.00383344	TRUE	-0.48
Brain_Anterior_cingulate_cortex_BA24	RP11-139H15.7	15	rs530798	-5.37	rs4774800	3.19	5.21875	442	5.49983	3.8e-08	0.000651814	TRUE	-0.42
Artery_Aorta	MAP2K1	15	rs11071896	8.34	rs11071896	-4.32	8.3387	519	-8.33871	7.51e-17	1.42e-12	TRUE	-0.64
Artery_Tibial	MAP2K1	15	rs11071896	8.34	rs17851970	-5.47	7.8095	520	-7.80952	5.74e-15	1.09e-10	TRUE	-0.73
Brain_Cerebellar_Hemisphere	LCTL	15	rs11071896	8.34	rs17851970	3.3	7.8095	589	7.80952	5.74e-15	1.08e-10	TRUE	0.52
Brain_Putamen_basal_ganglia	MAP2K1	15	rs11071896	8.34	rs12911848	2.93	-6	520	-7.0937	1.31e-12	2.25e-08	TRUE	-0.7
Brain_Putamen_basal_ganglia	DIS3L	15	rs11071896	8.34	rs12911848	-5.41	-6	490	4.80447	1.55e-06	0.0266151	TRUE	0.43
Brain_Spinal_cord_cervical_c-1	MAP2K1	15	rs11071896	8.34	rs8042305	-2.94	-6.6	517	6.6	4.11e-11	7.09e-07	TRUE	0.1
Brain_Substantia_nigra	DIS3L	15	rs11071896	8.34	rs12911848	-4.036	-6	490	6	1.97e-09	3.17e-05	TRUE	0.01
Breast_Mammary_Tissue	DIS3L	15	rs11071896	8.34	rs7176986	-6.838	-2.01905	490	5.1	3.31e-07	0.00649422	TRUE	0.35
Colon_Sigmoid	RP11-798K3.2	15	rs8042305	-6.6	rs1440371	2.55	-5.62295	558	-5.62295	1.88e-08	0.000348721	TRUE	0.17
Vagina	RP11-138H8.8	15	rs8043514	-5.62	rs1818443	2.93	1.8689	364	5.3718	7.8e-08	0.00135923	TRUE	-0.6
Brain_Substantia_nigra	RCCD1	15	rs2290202	-5.84	rs3826033	4.152	-5.7927	484	-5.79268	6.93e-09	0.00011167	TRUE	0.46
Cells_EBV-transformed_lymphocytes	RCCD1	15	rs2290202	-5.84	rs2290202	5.16	-5.8395	476	-5.8395	5.24e-09	8.31e-05	TRUE	0.69
Heart_Atrial_Appendage	PRC1-AS1	15	rs2290202	-5.84	rs2301826	-3.338	-5.2206	478	6.01288	1.82e-09	3.27e-05	TRUE	-0.51
Heart_Atrial_Appendage	CTD-3065B20.2	15	rs2290202	-5.84	rs2301826	3.825	-5.2206	449	-5.22059	1.78e-07	0.00320097	TRUE	0.57
Ovary	RPL36AP43	15	rs12908343	4.051	rs6496620	-2.69	-2.0769	388	5.09496	3.49e-07	0.00622511	TRUE	0.02
Uterus	RCCD1	15	rs2290202	-5.84	rs2290202	4.34	-5.8395	473	-4.92126	8.6e-07	0.0146389	TRUE	0.73
Artery_Aorta	ADCY9	16	rs2283479	-7.04	rs2283479	3.24	-7.03636	360	-7.03636	1.97e-12	3.71e-08	TRUE	0.03
Brain_Frontal_Cortex_BA9	UBALD1	16	rs1049205	-8.16	rs2075465	2.71	5.0678	414	5.0678	4.02e-07	0.00713952	TRUE	-0.47
Brain_Hippocampus	CREBBP	16	rs2283479	-7.04	rs8182173	2.591	4.98529	381	4.98529	6.19e-07	0.0104834	TRUE	0.03
Brain_Nucleus_accumbens_basal_ganglia	SRL	16	rs2283479	-7.04	rs804175	3.19	4.2615	374	6.00327	1.93e-09	3.51e-05	TRUE	0.05
Brain_Putamen_basal_ganglia	NAGPA-AS1	16	rs1049205	-8.16	rs12928193	-3.28	1.7326	439	5.92111	3.2e-09	5.49e-05	TRUE	-0.65
Brain_Substantia_nigra	RP11-709D24.8	16	rs1049205	-8.16	rs11645060	2.9	-0.21212	430	-6.2113	5.25e-10	8.46e-06	TRUE	0.63
Kidney_Cortex	ZNF500	16	rs1049205	-8.16	rs12599765	3.78	-3.23729	385	-4.86749	1.13e-06	0.0182145	TRUE	0.17
Minor_Salivary_Gland	RP11-295D4.5	16	rs1049205	-8.16	rs2251666	2.6	-6.15	430	-8.30438	1e-16	1.76e-12	TRUE	0.71
Minor_Salivary_Gland	LA16c-380F5.1	16	rs6600157	-4.91	rs1810481	2.82	1.0667	485	5.76049	8.39e-09	0.000147941	TRUE	-0.04
Nerve_Tibial	LINC01569	16	rs2283479	-7.04	rs757462	-4.91	4.76271	376	-4.76271	1.91e-06	0.0406352	TRUE	0.01
Small_Intestine_Terminal_Ileum	SEPT12	16	rs1049205	-8.16	rs8118	-4.19	4.84746	383	-4.84746	1.25e-06	0.0229087	TRUE	0.7
Thyroid	TNFRSF12A	16	rs11076844	-4.37	rs11863710	-2.88	-4.0423	359	5.0579	4.24e-07	0.00910498	TRUE	0.02
Vagina	ZNF200	16	rs11076844	-4.37	rs757107	-2.65	1.42353	393	-4.94573	7.59e-07	0.0132263	TRUE	0.06
Nerve_Tibial	NTAN1	16	rs3198697	4.28	rs11644601	-4.89	4.26984	104	-4.838	1.31e-06	0.0278702	TRUE	-0.74
Brain_Putamen_basal_ganglia	MYLPF	16	rs12716974	4.36	rs11642466	-2.66	-2.6989	198	5.21566	1.83e-07	0.00314229	TRUE	0.74
Brain_Caudate_basal_ganglia	KIFC3	16	rs16958674	-8.18	rs9806793	-3.96	-6.38235	542	6.38235	1.74e-10	3.15e-06	TRUE	-0.26
Brain_Caudate_basal_ganglia	CTD-2600O9.2	16	rs16958674	-8.18	rs2257931	-3.49	-2.89286	536	4.79509	1.63e-06	0.0294704	TRUE	0.01
Brain_Cerebellum	CIAPIN1	16	rs16958674	-8.18	rs1376041	-3.13	3.4531	577	-5.6387	1.71e-08	0.000338101	TRUE	0.45
Brain_Nucleus_accumbens_basal_ganglia	KIFC3	16	rs16958674	-8.18	rs9806793	-3.28	-6.3824	542	6.37247	1.86e-10	3.38e-06	TRUE	-0.47
Cells_EBV-transformed_lymphocytes	CCDC102A	16	rs16958674	-8.18	rs3180467	-2.96	-6.64407	546	6.64407	3.05e-11	4.83e-07	TRUE	-0.27
Esophagus_Gastroesophageal_Junction	RP11-357N13.6	16	rs1420285	6.74	rs4784351	-3.37	3.9	572	-5.77066	7.9e-09	0.000145242	TRUE	-0.06
Esophagus_Mucosa	ADGRG1	16	rs16958674	-8.18	rs11645934	3.68	-7.4426	521	-7.44262	9.87e-14	1.9e-09	TRUE	0.2
Lung	ADGRG3	16	rs16958674	-8.18	rs7205731	3.5	-7	521	-5.41209	6.23e-08	0.00129148	TRUE	0.35
Prostate	CTD-3032H12.1	16	rs3893264	-7.07	rs17205188	3.25	-4.7619	634	-4.89949	9.61e-07	0.0183263	TRUE	0
Skin_Not_Sun_Exposed_Suprapubic	ADGRG1	16	rs16958674	-8.18	rs11076198	3.66	-6.4138	521	-6.41379	1.42e-10	2.9e-06	TRUE	0.42
Stomach	RP11-407G23.4	16	rs16958674	-8.18	rs10852556	-4.19	-5.01587	546	5.01587	5.28e-07	0.00944328	TRUE	-0.28
Testis	IRX5	16	rs3893264	-7.07	rs8060558	-3.73	3.19444	634	-4.85151	1.23e-06	0.0339099	TRUE	0.07
Thyroid	RP11-459F6.3	16	rs16958674	-8.18	rs9937047	3.31	-4.7627	525	-4.76271	1.91e-06	0.0410153	TRUE	-0.04
Uterus	DRC7	16	rs16958674	-8.18	rs2305309	-2.7	-5.28814	518	5.2881	1.24e-07	0.00211073	TRUE	-0.11
Brain_Caudate_basal_ganglia	SLC7A6	16	rs2862780	-6.07	rs3743733	-3.06	-4.85965	296	4.85965	1.18e-06	0.0213344	TRUE	-0.38
Brain_Frontal_Cortex_BA9	HSD11B2	16	rs7200919	-5.42	rs6979	3.82	4.8393	222	4.83929	1.3e-06	0.023088	TRUE	-0.07
Brain_Nucleus_accumbens_basal_ganglia	AP1G1	16	rs217180	5.06	rs217180	2.92	5.0638	429	5.06383	4.11e-07	0.00746869	TRUE	-0.06
Colon_Sigmoid	CDH1	16	rs2862780	-6.07	rs1111720	-3.36	-4.6269	315	5.38917	7.08e-08	0.00131327	TRUE	-0.7
Ovary	TRADD	16	rs7200919	-5.42	rs1471142	-1.94	4.87395	261	-4.87395	1.09e-06	0.0194423	TRUE	0.08
Skin_Sun_Exposed_Lower_leg	RP11-354M1.2	16	rs2862780	-6.07	rs2862780	-2.356	-6.0714	307	6.07143	1.27e-09	2.65e-05	TRUE	-0.72
Skin_Sun_Exposed_Lower_leg	LRRC36	16	rs7200919	-5.42	rs11075645	3.12	3.0926	230	4.90984	9.12e-07	0.0190006	TRUE	-0.02
Small_Intestine_Terminal_Ileum	ENKD1	16	rs7200919	-5.42	rs1471142	-2.69	4.87395	218	-5.22624	1.73e-07	0.00317057	TRUE	0.09
Vagina	CENPT	16	rs1471142	4.87	rs1471142	-1.76	4.87395	231	-4.87395	1.09e-06	0.0189943	TRUE	-0.13
Adipose_Subcutaneous	RP11-467I17.1	16	rs9931561	7.59	rs9938074	2.94	6.9035	900	6.9035	5.07e-12	1.02e-07	TRUE	0
Adipose_Visceral_Omentum	MPHOSPH6	16	rs4889467	8.1	rs1134847	7.3	6.04762	747	6.04762	1.47e-09	2.84e-05	TRUE	0.23
Artery_Aorta	ZDHHC7	16	rs1566458	-6.43	rs9921436	-5.64	5.31579	651	-7.34151	2.11e-13	3.98e-09	TRUE	-0.02
Artery_Aorta	KIAA0513	16	rs1566458	-6.43	rs8052539	4.09	-3.77941	634	-5.25242	1.5e-07	0.00282705	TRUE	-0.03
Brain_Frontal_Cortex_BA9	MPHOSPH6	16	rs4889467	8.1	rs4889467	3.85	8.1034	746	8.10345	5.34e-16	9.48e-12	TRUE	0.66
Brain_Hippocampus	MPHOSPH6	16	rs4889467	8.1	rs2303264	5.161	5.89552	747	6.4797	9.19e-11	1.56e-06	TRUE	0.64
Brain_Hypothalamus	MPHOSPH6	16	rs4889467	8.1	rs2911407	3.21	4.93548	748	5.74938	8.96e-09	0.000155886	TRUE	0.64
Brain_Spinal_cord_cervical_c-1	KIAA0513	16	rs1566458	-6.43	rs16975222	4.35	-5	632	-5	5.73e-07	0.00988998	TRUE	0.06
Colon_Transverse	FAM92B	16	rs1566458	-6.43	rs3751751	-3.78	4.7273	565	-4.72727	2.28e-06	0.0438376	TRUE	0.09
Esophagus_Mucosa	MPHOSPH6	16	rs4889467	8.1	rs11639926	3.69	5.5507	747	5.55072	2.84e-08	0.000547808	TRUE	-0.09
Esophagus_Mucosa	KIAA0513	16	rs1566458	-6.43	rs16975222	4.17	-5	635	-5	5.73e-07	0.0110526	TRUE	0.05
Heart_Atrial_Appendage	MPHOSPH6	16	rs4889467	8.1	rs12597171	9.17	6.15873	745	5.66859	1.44e-08	0.000258955	TRUE	0.54
Minor_Salivary_Gland	MPHOSPH6	16	rs4889467	8.1	rs11639926	5.16	5.5507	746	5.31509	1.07e-07	0.00188673	TRUE	0.64
Muscle_Skeletal	ZDHHC7	16	rs1566458	-6.43	rs9921436	-6.47	5.31579	652	-8.21704	2.09e-16	3.61e-12	TRUE	-0.04
Nerve_Tibial	MPHOSPH6	16	rs4889467	8.1	rs2967355	7.62	6.25758	747	6.25758	3.91e-10	8.32e-06	TRUE	-0.02
Ovary	RP11-70D24.1	16	rs9931561	7.59	rs11643120	-3.72	6.4	829	-6.4	1.55e-10	2.76e-06	TRUE	-0.09
Prostate	MPHOSPH6	16	rs4889467	8.1	rs2303264	5.38	5.89552	749	5.89552	3.73e-09	7.11e-05	TRUE	0.01
Skin_Not_Sun_Exposed_Suprapubic	MPHOSPH6	16	rs4889467	8.1	rs2303262	5.57	6.197	749	5.2751	1.33e-07	0.002714	TRUE	0.49
Stomach	MPHOSPH6	16	rs4889467	8.1	rs2303262	8.11	6.19697	746	6.19697	5.76e-10	1.03e-05	TRUE	0.43
Stomach	FAM92B	16	rs1566458	-6.43	rs16975222	3.18	-5	564	-5	5.73e-07	0.0102481	TRUE	0.08
Brain_Anterior_cingulate_cortex_BA24	ZNF276	16	rs2239359	-5.33	rs7189734	-3.34	-4.98438	396	4.98438	6.22e-07	0.0106692	TRUE	-0.61
Brain_Putamen_basal_ganglia	VPS9D1-AS1	16	rs2239359	-5.33	rs7189734	3.86	-4.9844	408	-4.98438	6.22e-07	0.0106804	TRUE	0.47
Esophagus_Gastroesophageal_Junction	AC137932.5	16	rs2239359	-5.33	rs2099105	-2.57	-4.96875	403	4.96875	6.74e-07	0.0123915	TRUE	0.1
Minor_Salivary_Gland	DPEP1	16	rs2239359	-5.33	rs8045560	-3.1	-3.9649	442	5.82901	5.58e-09	9.84e-05	TRUE	-0.55
Muscle_Skeletal	VPS9D1-AS1	16	rs2239359	-5.33	rs2099105	5.53	-4.96875	409	-4.89256	9.95e-07	0.0171916	TRUE	0.65
Testis	VPS9D1	16	rs2239359	-5.33	rs2099105	7.48	-4.96875	405	-5.0395	4.67e-07	0.0128747	TRUE	0.66
Adipose_Visceral_Omentum	GEMIN4	17	rs684232	14.4	rs3744743	-5.68	6.5	428	-6.5	8.03e-11	1.55e-06	TRUE	-0.7
Adrenal_Gland	MRM3	17	rs684232	14.4	rs3760495	3.87	8.58824	409	5.18374	2.17e-07	0.00383439	TRUE	0.21
Brain_Anterior_cingulate_cortex_BA24	GEMIN4	17	rs684232	14.4	rs11653959	3.41	-0.403	422	-5.97377	2.32e-09	3.98e-05	TRUE	-0.41
Brain_Frontal_Cortex_BA9	VPS53	17	rs684232	14.4	rs8072041	4.95	-2.2117	448	-5.05723	4.25e-07	0.007548	TRUE	-0.23
Brain_Nucleus_accumbens_basal_ganglia	DOC2B	17	rs1833459	12.29	rs8072809	-3.42	-1.72414	212	4.99171	5.98e-07	0.0108669	TRUE	0.5
Brain_Substantia_nigra	VPS53	17	rs684232	14.4	rs10521104	-3.99	8.9315	448	-7.37108	1.69e-13	2.72e-09	TRUE	-0.37
Colon_Sigmoid	HNRNPA1P16	17	rs5030755	5.78	rs11658881	3.78	-1.1404	406	-4.96227	6.97e-07	0.0129287	TRUE	-0.03
Heart_Atrial_Appendage	DOC2B	17	rs1833459	12.29	rs8075084	3.06	1.86957	209	5.89273	3.8e-09	6.83e-05	TRUE	0.17
Lung	RPS4XP17	17	rs684232	14.4	rs2543777	3.56	-5.8226	447	-5.82	5.79e-09	0.000120027	TRUE	-0.46
Vagina	RP11-1260E13.1	17	rs684232	14.4	rs1064245	3.64	-4.79688	273	-4.79688	1.61e-06	0.0280559	TRUE	-0.69
Adipose_Visceral_Omentum	CD68	17	rs7224399	12.73	rs7224399	3.18	12.7333	477	12.7333	3.86e-37	7.47e-33	TRUE	0.38
Artery_Tibial	TRAPPC1	17	rs7224399	12.73	rs12103519	-4.03	6.83333	504	-5.95	2.63e-09	5e-05	TRUE	-0.6
Brain_Anterior_cingulate_cortex_BA24	AC113189.5	17	rs7224399	12.73	rs2228133	3.28	4.4455	475	4.7814	1.74e-06	0.0298462	TRUE	0.28
Brain_Caudate_basal_ganglia	RPL26	17	rs7224399	12.73	rs422679	2.93	1.6949	448	4.9109	9.06e-07	0.0163805	TRUE	0.18
Brain_Cerebellum	SNORA48	17	rs7224399	12.73	rs28625968	3.23	1.89474	480	4.83	1.39e-06	0.0274831	TRUE	0.24
Brain_Cortex	ZBTB4	17	rs7224399	12.73	rs9901643	-5.38	6.1053	489	-6.0853	1.16e-09	2.15e-05	TRUE	-0.19
Cells_Cultured_fibroblasts	AC025335.1	17	rs7224399	12.73	rs931543	5.31	-4.8686	506	-4.86857	1.12e-06	0.0202082	TRUE	-0.23
Colon_Transverse	GPS2	17	rs10432029	6.36	rs7141	3.33	-3.64407	455	-5.59257	2.24e-08	0.000430685	TRUE	0.03
Lung	FXR2	17	rs7224399	12.73	rs931543	3.13	-4.8686	495	-4.87	1.12e-06	0.0232176	TRUE	-0.07
Muscle_Skeletal	TRAPPC1	17	rs7224399	12.73	rs9897629	-2.84	1.14218	505	-6.15969	7.29e-10	1.26e-05	TRUE	-0.32
Nerve_Tibial	TMEM88	17	rs7224399	12.73	rs931543	3.436	-4.86857	510	-4.86857	1.12e-06	0.023828	TRUE	0.19
Prostate	RP11-1099M24.9	17	rs7224399	12.73	rs1625895	3.05	-5.5952	467	-5.6	2.19e-08	0.000417633	TRUE	-0.06
Stomach	CHD3	17	rs7224399	12.73	rs9912317	-4.46	10.5441	507	-10.5441	5.41e-26	9.68e-22	TRUE	-0.47
Testis	CHRNB1	17	rs7224399	12.73	rs2302765	10.18	5.9474	482	6.06	1.37e-09	3.78e-05	TRUE	0.18
Whole_Blood	PER1	17	rs7224399	12.73	rs11651993	-2.72	2.7612	433	-5.4694	4.52e-08	0.000735088	TRUE	-0.18
Brain_Amygdala	DRG2	17	rs4995264	5.93	rs2975004	-2.54	-0.23711	332	-6.08586	1.16e-09	1.93e-05	TRUE	-0.69
Uterus	OMG	17	rs7215931	-8.38	rs7215931	-2.06	-8.37681	370	8.37681	5.44e-17	9.26e-13	TRUE	-0.16
Whole_Blood	COPRS	17	rs7215931	-8.38	rs220443	-3.77	3.4386	320	-6.6999	2.09e-11	3.4e-07	TRUE	0.67
Adipose_Subcutaneous	PLXDC1	17	rs4239222	4.35	rs228274	-2.81	-2.2436	353	4.91732	8.77e-07	0.0176356	TRUE	-0.04
Adipose_Visceral_Omentum	CTB-58E17.3	17	rs16965356	4.95	rs16965350	2.78	4.8889	324	4.88889	1.01e-06	0.0195455	TRUE	-0.06
Brain_Hippocampus	ACACA	17	rs11263763	-36.96	rs3110641	3.81	9.43939	357	9.43939	3.75e-21	6.35e-17	TRUE	-0.09
Brain_Hypothalamus	SYNRG	17	rs11263763	-36.96	rs11654048	-3.199	-4.23214	304	20.7111	2.75e-95	4.78e-91	TRUE	-0.51
Brain_Spinal_cord_cervical_c-1	GPR179	17	rs2677185	6.16	rs7208573	3.07	-1.623	184	-5.63071	1.79e-08	0.000308954	TRUE	0.16
Cells_EBV-transformed_lymphocytes	HNF1B	17	rs11263763	-36.96	rs17705019	-2.68	-10.7909	247	10.7909	3.8e-27	6.02e-23	TRUE	-0.28
Colon_Transverse	HNF1B	17	rs11263763	-36.96	rs7223387	3.99	-16.3809	247	-16.3809	2.62e-60	5.04e-56	TRUE	0.12
Heart_Atrial_Appendage	ARHGAP23	17	rs16965356	4.95	rs9906975	3.44	-3.46552	219	-4.69358	2.68e-06	0.0481944	TRUE	-0.03
Liver	ACACA	17	rs11263763	-36.96	rs2074409	3.369	1.4286	357	-6.63425	3.26e-11	5.19e-07	TRUE	-0.03
Liver	DUSP14	17	rs11263763	-36.96	rs862490	4.908	-2.5172	334	-6.60387	4.01e-11	6.39e-07	TRUE	0.11
Nerve_Tibial	MIR378J	17	rs11263763	-36.96	rs4795224	-3.393	-3.83636	301	6.23888	4.41e-10	9.38e-06	TRUE	-0.21
Small_Intestine_Terminal_Ileum	RP11-378E13.3	17	rs11263763	-36.96	rs2677185	-3.32	6.16438	378	-5.72	1.09e-08	0.000199764	TRUE	0.11
Testis	TBC1D3K	17	rs11263763	-36.96	rs2677185	4.19	6.1644	229	12.1	9.21e-34	2.54e-29	TRUE	-0.23
Thyroid	ACACA	17	rs11263763	-36.96	rs17138201	3.2	-0.5618	359	-6.07257	1.26e-09	2.71e-05	TRUE	0.07
Vagina	HNF1B	17	rs11263763	-36.96	rs11651755	-3.3	-36.5714	247	36.5714	8.14e-293	1.42e-288	TRUE	-0.29
Vagina	ACACA	17	rs11263763	-36.96	rs11263766	-2.95	2.19403	359	-7.05601	1.71e-12	2.98e-08	TRUE	0.09
Adipose_Visceral_Omentum	RP11-6N17.10	17	rs17619103	6.29	rs11869926	-3.23	-0.5104	399	4.94743	7.52e-07	0.0145527	TRUE	-0.01
Adrenal_Gland	ZNF652	17	rs7216993	10.99	rs16948078	3.69	9.61818	349	9.61818	6.7e-22	1.18e-17	TRUE	0.47
Artery_Aorta	OSBPL7	17	rs17619103	6.29	rs3209	7.03	-4.3036	384	-5.13704	2.79e-07	0.00525831	TRUE	0.03
Artery_Coronary	AC091133.1	17	rs7216993	10.99	rs632824	2.85	7.11475	400	7.11475	1.12e-12	1.97e-08	TRUE	-0.24
Colon_Transverse	TTLL6	17	rs632824	7.11	rs12936406	-5.4	-5.61404	394	5.39236	6.95e-08	0.00133628	TRUE	0.02
Esophagus_Gastroesophageal_Junction	AC091133.1	17	rs7216993	10.99	rs7208074	-2.84	-5.76786	400	5.76786	8.03e-09	0.000147632	TRUE	0.01
Heart_Left_Ventricle	HOXB-AS1	17	rs632824	7.11	rs2229302	-4.36	6.0147	412	-6.01471	1.8e-09	2.93e-05	TRUE	-0.01
Muscle_Skeletal	SPOP	17	rs7216993	10.99	rs919089	-3.62	1.92188	394	-4.92849	8.29e-07	0.0143235	TRUE	-0.08
Testis	HOXB-AS1	17	rs632824	7.11	rs2229302	-5.42	6.0147	412	-6.01	1.8e-09	4.96e-05	TRUE	0.03
Testis	RP11-501C14.7	17	rs7216993	10.99	rs2240300	-2.93	-5.1385	410	5.14	2.77e-07	0.00763661	TRUE	0.18
Whole_Blood	EFCAB13	17	rs1053800	-4.65	rs11867253	-7.35	-4.2364	346	4.8144	1.48e-06	0.0240692	TRUE	0
Brain_Cerebellum	MPO	17	rs740605	-6.68	rs12944679	4.01	4.83077	364	4.83	1.36e-06	0.0268899	TRUE	-0.52
Brain_Cortex	RP11-579O24.3	17	rs740605	-6.68	rs11079369	-1.47	-5.0169	299	5.0169	5.25e-07	0.00974768	TRUE	-0.74
Brain_Hypothalamus	TSPOAP1-AS1	17	rs740605	-6.68	rs2680691	4.203	5.11111	349	5.11111	3.2e-07	0.00556736	TRUE	-0.27
Breast_Mammary_Tissue	SEPT4	17	rs740605	-6.68	rs12601370	2.82	-1.8313	329	-7.17147	7.42e-13	1.46e-08	TRUE	0.73
Colon_Sigmoid	SUPT4H1	17	rs740605	-6.68	rs13414	-4.37	-4.6986	344	4.69863	2.62e-06	0.0485984	TRUE	-0.56
Esophagus_Gastroesophageal_Junction	SRSF1	17	rs2632509	6.38	rs12450714	-3.22	-2.13208	478	5.80786	6.33e-09	0.000116377	TRUE	-0.55
Esophagus_Mucosa	MTMR4	17	rs740605	-6.68	rs12944679	-2.86	4.8308	327	-4.83077	1.36e-06	0.026233	TRUE	-0.41
Cells_EBV-transformed_lymphocytes	CLTC	17	rs7342863	-6.12	rs11079369	2.96	-5.0169	312	-5.05471	4.31e-07	0.00683135	TRUE	0.05
Brain_Anterior_cingulate_cortex_BA24	RP11-238F2.1	17	rs17765344	26.65	rs1606656	3.41	-0.8364	501	-12.401	2.58e-35	4.43e-31	TRUE	-0.36
Brain_Nucleus_accumbens_basal_ganglia	WIPI1	17	rs2302783	-4.9	rs2909207	-4.44	-4.52239	430	5.37147	7.81e-08	0.00141923	TRUE	0.07
Esophagus_Gastroesophageal_Junction	MYL6P5	17	rs4793529	26.4	rs2215050	-3.26	5.27407	505	-5.27407	1.33e-07	0.00244521	TRUE	-0.24
Liver	RP11-238F2.1	17	rs17765344	26.65	rs9906150	-3.291	-6.6667	504	6.66667	2.62e-11	4.17e-07	TRUE	0.53
Pituitary	C17orf58	17	rs2302783	-4.9	rs7221651	-3.96	-3.9265	329	4.71303	2.44e-06	0.0492075	TRUE	0.06
Testis	MYL6P5	17	rs4793529	26.4	rs1978203	4.2	19.0364	502	19	8.52e-81	2.35e-76	TRUE	0.71
Testis	CASC17	17	rs17765344	26.65	rs7211437	-3.54	-1.2667	540	-11.4	5.88e-30	1.62e-25	TRUE	-0.5
Testis	LINC02097	17	rs1122927	-5.47	rs9899714	-3.36	-5.0299	507	5.24	1.64e-07	0.00452132	TRUE	0.01
Brain_Cerebellum	MBD2	18	rs11083046	5.98	rs1787828	-2.29	-4.8814	386	4.8814	1.05e-06	0.0207606	TRUE	-0.03
Brain_Hippocampus	STARD6	18	rs11083046	5.98	rs7242085	4.41	5.7321	384	5.73214	9.92e-09	0.000168005	TRUE	0.01
Brain_Spinal_cord_cervical_c-1	STARD6	18	rs11083046	5.98	rs7242085	5.09	5.7321	384	5.73214	9.92e-09	0.000171219	TRUE	0.01
Kidney_Cortex	POLI	18	rs11083046	5.98	rs3730783	-3.78	5.9643	383	-5.9643	2.46e-09	3.97e-05	TRUE	-0.01
Minor_Salivary_Gland	POLI	18	rs11083046	5.98	rs3730783	-6.89	5.9643	383	-6.42965	1.28e-10	2.26e-06	TRUE	0.05
Whole_Blood	POLI	18	rs11083046	5.98	rs3730783	-11.45	5.9643	383	-5.9362	2.92e-09	4.75e-05	TRUE	0.07
Pituitary	ZNF236	18	rs7236466	5.88	rs7236466	-5.15	5.875	649	-5.875	4.23e-09	8.53e-05	TRUE	-0.06
Vagina	TSHZ1	18	rs10460109	5.23	rs41404946	-2.62	5	541	-5	5.73e-07	0.0099851	TRUE	-0.1
Brain_Hippocampus	CSNK1G2	19	rs7254820	4.89	rs7254820	-2.58	4.8871	378	-4.8871	1.02e-06	0.0172747	TRUE	-0.54
Esophagus_Muscularis	KLF16	19	rs7254820	4.89	rs11084912	5.96	4.1733	382	5.56276	2.66e-08	0.00050939	TRUE	0.35
Heart_Left_Ventricle	PLPP2	19	rs12981067	-4.67	rs3813154	5.35	4.60345	263	4.95497	7.23e-07	0.0117581	TRUE	-0.06
Brain_Cerebellar_Hemisphere	MYO9B	19	rs11666569	-8.77	rs10775622	-3.01	-4.7458	407	4.75	2.08e-06	0.0392454	TRUE	-0.49
Brain_Frontal_Cortex_BA9	MYO9B	19	rs11666569	-8.77	rs2305756	-4.16	-4.80357	408	5.3019	1.15e-07	0.0020424	TRUE	-0.69
Cells_EBV-transformed_lymphocytes	MYO9B	19	rs11666569	-8.77	rs4808567	3.43	4.7681	409	4.76812	1.86e-06	0.029481	TRUE	0.11
Kidney_Cortex	TMEM38A	19	rs11666569	-8.77	rs7246865	-3.67	-8.71875	356	8.71875	2.81e-18	4.53e-14	TRUE	-0.32
Lung	FAM129C	19	rs11666569	-8.77	rs7246865	-2.78	-8.7188	425	6.46055	1.04e-10	2.16e-06	TRUE	-0.56
Lung	CPAMD8	19	rs11666569	-8.77	rs2305756	3.89	-4.8036	407	-4.80357	1.56e-06	0.0323388	TRUE	0.54
Nerve_Tibial	IL12RB1	19	rs2305740	3.87	rs2305740	-6.16	3.8676	418	-4.75952	1.94e-06	0.0412735	TRUE	0.01
Ovary	CYP4F22	19	rs1290618	4.7	rs2072604	3.14	4.6562	539	4.68855	2.75e-06	0.0490517	TRUE	0.02
Pancreas	MYO9B	19	rs11666569	-8.77	rs3745349	3.67	4.5857	407	5.01	5.56e-07	0.0096188	TRUE	-0.38
Skin_Not_Sun_Exposed_Suprapubic	MYO9B	19	rs11666569	-8.77	rs11666569	-2.42	-8.7742	408	8.77419	1.72e-18	3.51e-14	TRUE	-0.44
Uterus	GTPBP3	19	rs11666569	-8.77	rs11666569	-3.01	-8.77419	435	8.77419	1.72e-18	2.93e-14	TRUE	-0.51
Whole_Blood	NDUFA13	19	rs7252981	4.79	rs11667828	4.07	4.28125	356	5.1104	3.21e-07	0.00522042	TRUE	-0.06
Esophagus_Muscularis	CTC-439O9.1	19	rs17501397	-5.82	rs16966171	2.35	-5.1458	358	-5.14583	2.66e-07	0.0050939	TRUE	0.67
Adrenal_Gland	PCAT19	19	rs2191139	-11.94	rs11672691	-6.24	-11.6119	347	11.9	8.76e-33	1.55e-28	TRUE	0.03
Artery_Coronary	COX6B1	19	rs756783	5.21	rs4806187	5.74	4.8	456	4.8	1.59e-06	0.0280317	TRUE	0.05
Artery_Tibial	SPINT2	19	rs12976534	17.91	rs7253245	-9.25	-10	363	8.66005	4.72e-18	8.97e-14	TRUE	0.44
Artery_Tibial	CEACAM3	19	rs2191139	-11.94	rs12981943	2.92	-8.1379	267	-8.13793	4.02e-16	7.64e-12	TRUE	0.01
Brain_Cortex	AC006129.1	19	rs2191139	-11.94	rs4802119	2.23	-11.1127	325	-11.1127	1.09e-28	2.02e-24	TRUE	0.03
Brain_Cortex	ACTN4	19	rs12976534	17.91	rs8113319	-3.78	1.98765	402	4.74548	2.08e-06	0.0386194	TRUE	0.24
Brain_Nucleus_accumbens_basal_ganglia	MAP4K1	19	rs12976534	17.91	rs4804034	3.36	4.88158	405	5.12284	3.01e-07	0.00546977	TRUE	0.18
Brain_Spinal_cord_cervical_c-1	LINC01480	19	rs2191139	-11.94	rs4802119	3.39	-11.1127	319	-11.1	1.09e-28	1.88e-24	TRUE	-0.03
Brain_Spinal_cord_cervical_c-1	MAP4K1	19	rs12976534	17.91	rs3786873	-2.23	6.5672	391	-6.57	5.13e-11	8.85e-07	TRUE	-0.12
Brain_Spinal_cord_cervical_c-1	RYR1	19	rs12976534	17.91	rs705503	-2.34	5.3929	374	-5.39	6.93e-08	0.00119612	TRUE	0.15
Breast_Mammary_Tissue	LINC01480	19	rs2191139	-11.94	rs7255742	3.96	-8.31884	319	-6.35183	2.13e-10	4.18e-06	TRUE	-0.01
Colon_Sigmoid	CEACAM4	19	rs2191139	-11.94	rs1029804	-3.95	-6.91045	305	8.34959	6.85e-17	1.27e-12	TRUE	-0.01
Colon_Sigmoid	ZNF527	19	rs1119229	7.63	rs17246792	2.98	6.44643	292	6.69262	2.19e-11	4.06e-07	TRUE	0.07
Esophagus_Gastroesophageal_Junction	ECH1	19	rs1052375	-10.02	rs7253151	-3.05	-6.3793	389	6.38	1.78e-10	3.27e-06	TRUE	0.01
Esophagus_Gastroesophageal_Junction	COX6B1	19	rs756783	5.21	rs10401695	5.79	4.8036	458	4.86	1.16e-06	0.0213266	TRUE	0.05
Esophagus_Mucosa	SIPA1L3	19	rs12976534	17.91	rs17248670	-3.45	-4.4655	334	6.84	8.02e-12	1.55e-07	TRUE	0.19
Heart_Left_Ventricle	CTD-2554C21.1	19	rs12976534	17.91	rs17306900	3.7	-3.87719	306	-5.53648	3.09e-08	0.000502527	TRUE	-0.09
Lung	CYP2A13	19	rs2191139	-11.94	rs2316973	-3.6	-5.303	403	5.30303	1.14e-07	0.00236322	TRUE	0.06
Muscle_Skeletal	ZNF793	19	rs705495	7.74	rs35153242	-4.07	-3.68421	275	6.3617	2e-10	3.46e-06	TRUE	0.05
Ovary	CTB-102L5.7	19	rs12976534	17.91	rs7253245	2.09	-10	368	-10	1.52e-23	2.71e-19	TRUE	0.24
Pancreas	PPP1R14A	19	rs12976534	17.91	rs8102454	4.88	-16.6071	362	-8.43	3.52e-17	6.09e-13	TRUE	-0.42
Pancreas	ETV2	19	rs756783	5.21	rs8110747	-10.85	5.0526	457	-4.98	6.44e-07	0.0111412	TRUE	-0.1
Small_Intestine_Terminal_Ileum	SIRT2	19	rs10407327	-6.4	rs8103619	-3.28	-4.9244	393	4.92437	8.46e-07	0.0155046	TRUE	0.11
Spleen	PCAT19	19	rs2191139	-11.94	rs4802119	-6.96	-11.1127	340	12.2049	2.93e-34	5.61e-30	TRUE	0
Spleen	EIF3K	19	rs12976534	17.91	rs2232997	4.26	-2.8515	408	-5.59448	2.21e-08	0.000423149	TRUE	-0.25
Spleen	RN7SL663P	19	rs12976534	17.91	rs2960337	-2.7	-3.9868	367	5.21574	1.83e-07	0.0035039	TRUE	0.18
Spleen	ETV2	19	rs756783	5.21	rs8110747	-3.66	5.0526	457	-5.05263	4.36e-07	0.00834809	TRUE	-0.01
Spleen	LINC01535	19	rs6508736	7.61	rs256744	7.58	-3.9298	282	-4.71124	2.46e-06	0.0471016	TRUE	-0.12
Stomach	COX6B1	19	rs756783	5.21	rs10422762	-5.17	-4.69091	458	4.83956	1.3e-06	0.0232505	TRUE	0.03
Testis	ZBTB32	19	rs756783	5.21	rs10422762	-3.33	-4.69091	441	5.45934	4.78e-08	0.0013178	TRUE	0.04
Thyroid	PCAT19	19	rs2191139	-11.94	rs2191139	-12	-11.9385	346	12.0061	3.3e-33	7.09e-29	TRUE	0.01
Uterus	UPK1A	19	rs756783	5.21	rs10422762	3.51	-4.69091	450	-4.69091	2.72e-06	0.0462998	TRUE	-0.01
Vagina	CTD-2554C21.1	19	rs12976534	17.91	rs17246792	-3.29	6.4464	304	-5.10139	3.37e-07	0.00587256	TRUE	-0.12
Adipose_Subcutaneous	KLK3	19	rs17632542	-27.92	rs17632542	4.63	-27.9189	537	-27.9	1.57e-171	3.16e-167	TRUE	0.31
Brain_Amygdala	FCGRT	19	rs3760707	6.5	rs3760707	-3.8	6.5	365	-6.5	8.03e-11	1.33e-06	TRUE	-0.02
Brain_Cerebellar_Hemisphere	IGLON5	19	rs17632542	-27.92	rs11084034	3.22	11	675	11	3.82e-28	7.21e-24	TRUE	-0.17
Brain_Cortex	GFY	19	rs3760707	6.5	rs2288920	1.87	6.29167	364	6.29167	3.14e-10	5.83e-06	TRUE	-0.03
Brain_Frontal_Cortex_BA9	CTD-2560K21.6	19	rs17632542	-27.92	rs10408670	-3.52	-5.24176	478	5.24176	1.59e-07	0.00282384	TRUE	0.14
Brain_Hypothalamus	PRR12	19	rs3760707	6.5	rs10417980	4.15	5.5	362	5.5	3.8e-08	0.000661124	TRUE	0.01
Breast_Mammary_Tissue	LRRC4B	19	rs17632542	-27.92	rs6998	-3.24	10.7241	485	-11.0122	3.34e-28	6.55e-24	TRUE	0.22
Breast_Mammary_Tissue	CTU1	19	rs17632542	-27.92	rs17632611	3.09	8.0367	615	8.0367	9.23e-16	1.81e-11	TRUE	-0.06
Cells_EBV-transformed_lymphocytes	PRRG2	19	rs3760707	6.5	rs3760707	-2.09	6.5	362	-6.5	8.03e-11	1.27e-06	TRUE	0.06
Colon_Sigmoid	KLK3	19	rs17632542	-27.92	rs8101316	-3.27	-0.35088	535	-5.02274	5.09e-07	0.00944144	TRUE	0.13
Esophagus_Gastroesophageal_Junction	PRR12	19	rs3760707	6.5	rs10417980	6.89	5.5	362	5.1	3.32e-07	0.00610382	TRUE	0.02
Esophagus_Mucosa	KLK1	19	rs17632542	-27.92	rs2659101	-6.68	5.1053	532	-5.11	3.3e-07	0.00636537	TRUE	-0.05
Liver	PRRG2	19	rs3760707	6.5	rs2288921	6.25	6.16418	363	6.16418	7.08e-10	1.13e-05	TRUE	0
Prostate	CTC-518B2.9	19	rs17632542	-27.92	rs6998	4.17	10.7241	600	10.7241	7.84e-27	1.5e-22	TRUE	-0.13
Skin_Not_Sun_Exposed_Suprapubic	KLK2	19	rs17632542	-27.92	rs2003783	4.09	3.2121	537	6.99789	2.6e-12	5.31e-08	TRUE	-0.18
Small_Intestine_Terminal_Ileum	KLK3	19	rs17632542	-27.92	rs11084034	-3.76	11	534	-12.109	9.47e-34	1.74e-29	TRUE	0.26
Small_Intestine_Terminal_Ileum	KLK4	19	rs17632542	-27.92	rs6998	-3.53	10.7241	553	-10.7241	7.84e-27	1.44e-22	TRUE	0.21
Stomach	KLK1	19	rs17632542	-27.92	rs3212855	-3.46	-3.95699	532	-7.94089	2.01e-15	3.59e-11	TRUE	0.24
Testis	IGLON5	19	rs17632542	-27.92	rs11672116	4.29	-1.1129	674	-5.81772	5.97e-09	0.000164587	TRUE	0.07
Uterus	FAM71E1	19	rs17632542	-27.92	rs2735839	-2.77	-22.5625	439	22.5625	1.01e-112	1.72e-108	TRUE	-0.19
Uterus	CD33	19	rs17632542	-27.92	rs3810102	-2.66	-1.13462	643	-5.36417	8.13e-08	0.00138389	TRUE	0.06
Artery_Aorta	ADAM17	2	rs7575106	7.916	rs7575106	2.874	7.91589	473	7.92	2.45e-15	4.62e-11	TRUE	-0.01
Artery_Tibial	RN7SL832P	2	rs1990613	-11.982	rs1012580	-6.79	8.31667	626	-5.16121	2.45e-07	0.00465598	TRUE	0.35
Brain_Cerebellar_Hemisphere	LINC01105	2	rs2564061	5.268	rs1560246	-2.96	4.89286	610	-4.89286	9.94e-07	0.0187548	TRUE	-0.07
Brain_Cerebellum	LINC00298	2	rs6431940	7.14	rs6431940	-2.67	7.14035	506	-7.14035	9.31e-13	1.84e-08	TRUE	0.03
Cells_Cultured_fibroblasts	RP11-320M2.1	2	rs1990613	-11.982	rs16867251	2.94	6.8889	611	6.89	5.62e-12	1.01e-07	TRUE	0.39
Cells_Cultured_fibroblasts	GRHL1	2	rs7575106	7.916	rs731453	-4.71	4.7121	539	-4.71	2.45e-06	0.0442053	TRUE	-0.07
Esophagus_Muscularis	RN7SL832P	2	rs1990613	-11.982	rs1012580	-6.384	8.31667	625	-8.32	9.05e-17	1.73e-12	TRUE	0.71
Muscle_Skeletal	GRHL1	2	rs7575106	7.916	rs7575106	-3.75	7.9159	539	-6.28311	3.32e-10	5.74e-06	TRUE	-0.04
Pituitary	NOL10	2	rs1990613	-11.982	rs9287721	4.81	-8.01695	623	-7.46	8.44e-14	1.7e-09	TRUE	0.67
Small_Intestine_Terminal_Ileum	RP11-345J13.1	2	rs1990613	-11.982	rs4669632	2.91	-1.63725	501	-4.84805	1.25e-06	0.0229087	TRUE	0.2
Vagina	ID2	2	rs6431940	7.14	rs6727210	3.22	-5	430	-5.287	1.24e-07	0.00216082	TRUE	-0.06
Whole_Blood	RN7SL832P	2	rs1990613	-11.982	rs2287059	4.02	8.15	624	8.25	1.56e-16	2.54e-12	TRUE	-0.57
Adipose_Subcutaneous	AC017002.2	2	rs17041869	9.506	rs1877330	-3.2	8.17273	298	-8.17273	3.01e-16	6.05e-12	TRUE	-0.67
Artery_Tibial	BUB1	2	rs17041869	9.506	rs17041869	2.24	9.50602	275	9.50602	1.98e-21	3.76e-17	TRUE	0.31
Brain_Frontal_Cortex_BA9	BUB1	2	rs17041869	9.506	rs3761705	3.51	-6.3065	271	-6.30645	2.86e-10	5.08e-06	TRUE	0.13
Cells_Cultured_fibroblasts	BCL2L11	2	rs17041869	9.506	rs17041869	-3.61	9.506	319	-9.51	1.98e-21	3.57e-17	TRUE	-0.25
Nerve_Tibial	RP11-803D5.1	2	rs17041869	9.506	rs13388646	-3.726	7.75676	347	-7.75676	8.71e-15	1.85e-10	TRUE	-0.43
Skin_Not_Sun_Exposed_Suprapubic	BCL2L11	2	rs17041869	9.506	rs17041869	-4.09	9.50602	319	-9.50602	1.98e-21	4.04e-17	TRUE	-0.43
Skin_Sun_Exposed_Lower_leg	AC012442.5	2	rs4849090	-6.192	rs12996187	7.23	-5.90789	446	-6.66	2.68e-11	5.58e-07	TRUE	-0.04
Brain_Putamen_basal_ganglia	MTND4P26	2	rs13419301	5.868	rs13419301	-2.2	5.8682	326	-5.86822	4.41e-09	7.57e-05	TRUE	-0.11
Colon_Transverse	AC079584.3	2	rs7421813	-4.86	rs7421813	-3.142	-4.86	409	4.86	1.17e-06	0.0224956	TRUE	-0.43
Brain_Spinal_cord_cervical_c-1	ORC4	2	rs1881571	6.364	rs2288190	-2.779	-4.19298	326	5.11349	3.16e-07	0.00545416	TRUE	0.38
Brain_Anterior_cingulate_cortex_BA24	DLX2	2	rs1574259	-18.685	rs6744873	-3.13	-9.44615	454	9.45	3.52e-21	6.04e-17	TRUE	-0.12
Brain_Hippocampus	RAPGEF4-AS1	2	rs1574259	-18.685	rs10193942	4.38	-5.35484	490	-5.35484	8.56e-08	0.00144972	TRUE	0.29
Brain_Substantia_nigra	RP11-227L6.1	2	rs1574259	-18.685	rs6742057	2.6	0.7955	463	-9.14368	6.04e-20	9.73e-16	TRUE	0.3
Colon_Transverse	HOXD9	2	rs863678	4.814	rs863678	-3	4.81356	468	-4.81356	1.48e-06	0.028456	TRUE	-0.01
Esophagus_Gastroesophageal_Junction	MAP3K20	2	rs836628	-11.02	rs8446	-3.186	-2.16393	462	5.74	9.29e-09	0.000170797	TRUE	-0.12
Heart_Atrial_Appendage	PDK1	2	rs1574259	-18.685	rs12693008	-6.12	-6.52308	495	6.52	6.89e-11	1.24e-06	TRUE	-0.52
Muscle_Skeletal	PDK1	2	rs1574259	-18.685	rs10930562	-9.49	-8.5278	495	8.84156	9.44e-19	1.63e-14	TRUE	-0.38
Nerve_Tibial	PDK1	2	rs1574259	-18.685	rs836616	-3.992	-6.16418	495	6.16418	7.08e-10	1.51e-05	TRUE	-0.35
Prostate	ITGA6	2	rs1574259	-18.685	rs10930541	3.305	-0.4915	462	4.88197	1.05e-06	0.0200235	TRUE	-0.3
Small_Intestine_Terminal_Ileum	DLX1	2	rs1574259	-18.685	rs11687010	2.46	-8.71429	454	-8.71429	2.93e-18	5.37e-14	TRUE	-0.19
Spleen	CDCA7	2	rs11078	7.684	rs11679682	3.43	1.52239	486	4.8659	1.14e-06	0.0218276	TRUE	-0.02
Testis	AC078883.3	2	rs1574259	-18.685	rs2293647	4.82	-17.7054	468	-17.7054	3.81e-70	1.05e-65	TRUE	0.7
Uterus	RP11-394I13.3	2	rs16862246	5.678	rs16862244	-2.94	5.46957	406	-5.47134	4.47e-08	0.000760883	TRUE	-0.01
Whole_Blood	ITGA6	2	rs1574259	-18.685	rs1076597	5.17	-9.9661	466	-9.97	2.14e-23	3.48e-19	TRUE	0.43
Brain_Cerebellar_Hemisphere	NAB1	2	rs1155060	4.965	rs2356121	-3.54	-3.21429	371	5.06191	4.15e-07	0.00783022	TRUE	0.68
Artery_Aorta	CASP10	2	rs6735656	-7.806	rs700636	2.992	-6.18182	350	-6.18	6.34e-10	1.19e-05	TRUE	0.29
Brain_Amygdala	CFLAR	2	rs6735656	-7.806	rs3815501	3.3	-1.49315	376	-5.16864	2.36e-07	0.00391642	TRUE	0.4
Brain_Putamen_basal_ganglia	CASP8	2	rs6735656	-7.806	rs10931936	3.59	-7.1803	350	-7.18033	6.95e-13	1.19e-08	TRUE	0.76
Heart_Atrial_Appendage	CASP8	2	rs6735656	-7.806	rs13016963	-6.28	-6.33333	349	6.33	2.4e-10	4.32e-06	TRUE	-0.73
Kidney_Cortex	NIF3L1	2	rs6735656	-7.806	rs3731714	2.767	4.89831	434	4.89831	9.67e-07	0.0155871	TRUE	-0.32
Brain_Amygdala	AC007879.4	2	rs1263673	6.281	rs16839837	-2.95	-2.51887	462	6.57279	4.94e-11	8.2e-07	TRUE	0.63
Breast_Mammary_Tissue	AC007879.2	2	rs1263673	6.281	rs717973	-3.77	-5.63158	459	5.63158	1.79e-08	0.000351198	TRUE	0.48
Pituitary	RP11-105N14.2	2	rs4672676	5.836	rs6709554	-2.82	5.37931	336	-5.38	7.48e-08	0.00150849	TRUE	-0.47
Brain_Substantia_nigra	MYCN	2	rs6726347	-6.2	rs11884807	2.8	1.8298	482	5.81978	5.89e-09	9.49e-05	TRUE	-0.46
Artery_Aorta	LRRFIP1	2	rs6760913	10.088	rs6743986	5.145	2.63636	513	4.94	7.7e-07	0.0145122	TRUE	0.2
Artery_Tibial	RAMP1	2	rs6760913	10.088	rs2325810	3.35	5.90909	488	5.14539	2.67e-07	0.00507407	TRUE	0.36
Artery_Tibial	AC105760.2	2	rs6760913	10.088	rs6717825	3.56	3.65385	517	4.81249	1.49e-06	0.028316	TRUE	0
Brain_Frontal_Cortex_BA9	AC105760.2	2	rs6760913	10.088	rs7600317	-2.92	8.9853	517	-5.08151	3.74e-07	0.00664224	TRUE	-0.47
Brain_Substantia_nigra	COL6A3	2	rs6760913	10.088	rs13416014	3.22	2.8525	526	5.90029	3.63e-09	5.85e-05	TRUE	0.31
Heart_Atrial_Appendage	RAB17	2	rs6760913	10.088	rs4663751	3.12	1.19811	507	-6.08	1.22e-09	2.19e-05	TRUE	-0.57
Liver	RAMP1	2	rs6760913	10.088	rs7582964	-2.351	9.5316	487	-9.53165	1.55e-21	2.47e-17	TRUE	-0.57
Minor_Salivary_Gland	COPS8	2	rs6760913	10.088	rs7595979	-2.581	8.72308	507	-8.72	2.71e-18	4.78e-14	TRUE	-0.56
Ovary	AC105760.2	2	rs6760913	10.088	rs2600791	3.19	0.3659	516	6.52104	6.98e-11	1.25e-06	TRUE	0.29
Stomach	AC104667.3	2	rs6760913	10.088	rs1198823	-3.102	1.14754	498	-5.78974	7.05e-09	0.000126089	TRUE	-0.61
Testis	MLPH	2	rs6760913	10.088	rs7582964	5.15	9.5316	507	9.53165	1.55e-21	4.27e-17	TRUE	0.75
Brain_Anterior_cingulate_cortex_BA24	PASK	2	rs4346380	9.907	rs10933532	4.28	5.60194	418	5.6	2.12e-08	0.000363644	TRUE	-0.15
Brain_Cerebellar_Hemisphere	AC005104.3	2	rs4346380	9.907	rs2074840	3.77	6.01695	367	6.01695	1.78e-09	3.36e-05	TRUE	-0.39
Brain_Hippocampus	PASK	2	rs4346380	9.907	rs11681962	4.15	5.89524	422	5.89524	3.74e-09	6.33e-05	TRUE	0.19
Brain_Hypothalamus	AC005104.3	2	rs4346380	9.907	rs2074840	-2.35	6.01695	369	-6.02	1.78e-09	3.1e-05	TRUE	0.37
Esophagus_Mucosa	RTP5	2	rs17386695	9.813	rs35976554	2.441	0.45342	166	4.78	1.73e-06	0.03337	TRUE	0.33
Esophagus_Muscularis	PPP1R7	2	rs4346380	9.907	rs12616173	3.77	6.24742	420	7.39	1.44e-13	2.76e-09	TRUE	-0.03
Minor_Salivary_Gland	MTERF4	2	rs4346380	9.907	rs2302045	-3.149	4.7931	440	-4.79	1.63e-06	0.0287418	TRUE	0.02
Nerve_Tibial	HDLBP	2	rs4346380	9.907	rs7568	-11.457	-4.08571	377	6.28175	3.35e-10	7.13e-06	TRUE	0.21
Pituitary	AC005104.3	2	rs4346380	9.907	rs11681497	3.45	-6.18681	369	-10.6	4.84e-26	9.76e-22	TRUE	-0.69
Pituitary	SEPT2	2	rs4346380	9.907	rs11681497	9.33	-6.18681	372	-6.19	6.14e-10	1.24e-05	TRUE	-0.34
Stomach	PPP1R7	2	rs4346380	9.907	rs2279845	3.026	7.10526	413	5.20154	1.98e-07	0.00354123	TRUE	0.33
Uterus	C2orf54	2	rs4346380	9.907	rs13424854	-2.84	3.0625	471	-4.77371	1.81e-06	0.0308098	TRUE	-0.15
Vagina	MTERF4	2	rs4346380	9.907	rs740393	-5.007	5.25	438	-5.0249	5.04e-07	0.0087827	TRUE	0.04
Artery_Coronary	LDAH	2	rs9306894	13.246	rs13385191	-6.401	8.2222	526	-8.22222	2e-16	3.53e-12	TRUE	-0.56
Artery_Coronary	GDF7	2	rs9306894	13.246	rs3732148	3.052	-4.1402	508	-5.15093	2.59e-07	0.00456617	TRUE	-0.22
Brain_Substantia_nigra	LDAH	2	rs9306894	13.246	rs13385191	-6.18	8.2222	527	-8.22222	2e-16	3.22e-12	TRUE	-0.62
Breast_Mammary_Tissue	GDF7	2	rs9306894	13.246	rs3732148	3.35	-4.14019	505	-4.70989	2.48e-06	0.0486576	TRUE	-0.38
Esophagus_Mucosa	LINC01376	2	rs6707044	4.757	rs6707044	5.266	4.75714	558	4.76	1.96e-06	0.0378064	TRUE	-0.05
Esophagus_Muscularis	PUM2	2	rs9306894	13.246	rs12472693	3.515	6.06452	535	6.06	1.32e-09	2.53e-05	TRUE	0.18
Kidney_Cortex	LDAH	2	rs9306894	13.246	rs13394027	-2.833	8.80303	522	-8.1568	3.44e-16	5.54e-12	TRUE	-0.57
Skin_Not_Sun_Exposed_Suprapubic	LDAH	2	rs9306894	13.246	rs13385191	-8.26	8.22222	525	-8.22222	2e-16	4.08e-12	TRUE	-0.68
Whole_Blood	GDF7	2	rs9306894	13.246	rs1079171	-5.73	1.7966	506	-4.84	1.28e-06	0.0208166	TRUE	-0.45
Skin_Not_Sun_Exposed_Suprapubic	RBKS	2	rs11127134	-4.632	rs2950835	3.51	3.19643	303	5.14946	2.61e-07	0.00532597	TRUE	-0.63
Brain_Hypothalamus	RP11-288C18.1	2	rs3770900	-4.768	rs711244	3.57	3.57895	552	5.46	4.72e-08	0.000821186	TRUE	-0.01
Prostate	RMDN2-AS1	2	rs1013292	-5.571	rs1013292	4.181	-5.5714	590	-5.57143	2.53e-08	0.000482471	TRUE	0.51
Adipose_Subcutaneous	AC098824.6	2	rs1465618	10.955	rs4953662	-3.63	-3.64286	451	7.92184	2.34e-15	4.71e-11	TRUE	0.1
Adrenal_Gland	HAAO	2	rs13026309	9.345	rs920390	-3.981	7.42857	454	-7.14064	9.29e-13	1.64e-08	TRUE	-0.07
Artery_Aorta	LINC01119	2	rs13013607	5.091	rs1466021	-3.667	3.74138	595	-4.72	2.32e-06	0.043725	TRUE	-0.05
Brain_Cortex	MTA3	2	rs6715170	8.312	rs9973454	3.11	4.6667	487	5.26002	1.44e-07	0.00267365	TRUE	0.04
Brain_Nucleus_accumbens_basal_ganglia	AC010883.5	2	rs7567607	12.632	rs6713155	2.49	-4.7164	495	-4.72	2.4e-06	0.0436128	TRUE	0.22
Breast_Mammary_Tissue	ZFP36L2	2	rs7567607	12.632	rs1371404	-3.32	-4.80357	496	4.80357	1.56e-06	0.0306072	TRUE	0.45
Cells_EBV-transformed_lymphocytes	THADA	2	rs7567607	12.632	rs17406278	-2.876	-5.70787	475	5.70787	1.14e-08	0.00018069	TRUE	0.25
Liver	ZFP36L2	2	rs7567607	12.632	rs10495903	-3.454	-4.5904	495	5.17128	2.32e-07	0.0036953	TRUE	0.23
Muscle_Skeletal	MTA3	2	rs6715170	8.312	rs2888840	2.99	-5.9636	487	-5.96364	2.47e-09	4.27e-05	TRUE	-0.1
Testis	ZFP36L2	2	rs7567607	12.632	rs1992284	4.26	8.0952	496	8.09524	5.72e-16	1.58e-11	TRUE	-0.19
Thyroid	THADA	2	rs7567607	12.632	rs7561670	-3.4	-8.4507	476	7.64461	2.1e-14	4.51e-10	TRUE	0.47
Uterus	AC098824.6	2	rs1465618	10.955	rs13398984	-3.18	-5.86567	449	5.86567	4.47e-09	7.61e-05	TRUE	0.14
Artery_Tibial	AC009501.4	2	rs2710647	-19.327	rs1038570	-4.58	-9.16176	265	9.16176	5.11e-20	9.71e-16	TRUE	-0.53
Brain_Caudate_basal_ganglia	AC009501.4	2	rs2710647	-19.327	rs6545977	3.24	19.1636	265	13.6	3.32e-42	6e-38	TRUE	-0.41
Brain_Substantia_nigra	ACA59	2	rs9808380	11.564	rs6546004	-3.13	9.3607	328	-9.36066	7.92e-21	1.28e-16	TRUE	0.23
Heart_Atrial_Appendage	AC016734.2	2	rs13431584	12.255	rs2421918	-3.37	5.86735	278	-5.87	4.43e-09	7.97e-05	TRUE	0.44
Kidney_Cortex	TMEM17	2	rs2710647	-19.327	rs6753189	4.303	11.2969	322	10.0783	6.89e-24	1.11e-19	TRUE	-0.28
Liver	EHBP1	2	rs2710647	-19.327	rs13417654	2.23	7.881	315	7.88095	3.25e-15	5.18e-11	TRUE	0.56
Pituitary	VPS54	2	rs10210482	9.921	rs12991346	4.34	-5.83636	374	-6.04	1.56e-09	3.15e-05	TRUE	0.12
Prostate	RP11-568N6.1	2	rs329483	6.929	rs329483	3.298	6.9286	465	6.88196	5.9e-12	1.13e-07	TRUE	-0.2
Testis	MEIS1	2	rs952203	6.481	rs6717698	-2.56	4.9848	476	-4.98485	6.2e-07	0.0170928	TRUE	-0.05
Adipose_Visceral_Omentum	ELMOD3	2	rs6705971	-14.164	rs6643	3.21	-5.5062	449	-5.51	3.67e-08	0.000710218	TRUE	-0.06
Adrenal_Gland	GGCX	2	rs6705971	-14.164	rs6739015	4.539	-13.2727	473	-9.14574	5.92e-20	1.05e-15	TRUE	0.68
Colon_Transverse	PEBP1P2	2	rs6705971	-14.164	rs2044475	2.878	-8.47761	449	-8.02385	1.02e-15	1.96e-11	TRUE	0.46
Pancreas	ST3GAL5	2	rs6705971	-14.164	rs10445963	3.32	-1.10526	461	-5.35988	8.33e-08	0.00144109	TRUE	0.21
Pituitary	RETSAT	2	rs6705971	-14.164	rs1969260	4.57	2.85965	449	6.06	1.34e-09	2.7e-05	TRUE	-0.32
Testis	C2orf68	2	rs6705971	-14.164	rs6643	3.77	-5.5062	475	-5.50625	3.67e-08	0.00101178	TRUE	0.14
Uterus	USP39	2	rs6705971	-14.164	rs1374370	-4.07	-8.04918	468	8.04918	8.34e-16	1.42e-11	TRUE	-0.68
Uterus	AC093162.5	2	rs6705971	-14.164	rs7557391	-3.18	-0.42105	439	6.03512	1.59e-09	2.71e-05	TRUE	-0.21
Esophagus_Muscularis	REV1	2	rs12998444	4.449	rs6746134	2.776	3.64062	324	4.93	8.08e-07	0.0154732	TRUE	0.77
Vagina	JAG1	20	rs6077978	-5.66	rs7270364	-3.39	5.4141	585	-5.41414	6.16e-08	0.00107344	TRUE	-0.31
Brain_Frontal_Cortex_BA9	FAM182A	20	rs7260957	-5.38	rs2697515	-6.86	-2.90141	97	5.0608	4.18e-07	0.00742368	TRUE	-0.46
Liver	NINL	20	rs2281558	-5.62	rs6050431	2.53	-4.7636	269	-4.76354	1.9e-06	0.0302632	TRUE	0.55
Nerve_Tibial	RP4-738P15.1	20	rs2281558	-5.62	rs6132792	-3.03	0.94118	449	4.81074	1.5e-06	0.0319125	TRUE	-0.67
Testis	PYGB	20	rs2281558	-5.62	rs11699316	-3.75	-5.1786	421	5.17857	2.24e-07	0.00617546	TRUE	0.2
Whole_Blood	RP5-965G21.4	20	rs2281558	-5.62	rs1007707	-4.76	-4.7636	425	4.7636	1.9e-06	0.0308997	TRUE	-0.56
Brain_Cerebellum	DNMT3B	20	rs6058869	-6.18	rs4911110	6.28	-6.14286	418	-6.51023	7.5e-11	1.48e-06	TRUE	0.04
Heart_Left_Ventricle	RBM12	20	rs6060369	-6.38	rs2425024	-2.84	-4.9833	301	4.98333	6.25e-07	0.0101644	TRUE	0.34
Muscle_Skeletal	RPRD1B	20	rs6023059	-4.68	rs6023059	7.64	-4.68421	480	-4.68	2.81e-06	0.0485512	TRUE	-0.08
Prostate	FAM83C	20	rs6060369	-6.38	rs7280	-4.75	-6	342	5.34375	9.1e-08	0.00173537	TRUE	-0.6
Thyroid	ABALON	20	rs1484994	-5.58	rs6060599	3.02	-5.5667	307	-5.5667	2.6e-08	0.000558324	TRUE	0.02
Uterus	ZNF341-AS1	20	rs2065703	-5.39	rs2065703	-3.484	-5.38961	245	6.28847	3.21e-10	5.46e-06	TRUE	-0.1
Uterus	FER1L4	20	rs6060369	-6.38	rs6088792	3.232	-5.88333	309	-6.04068	1.53e-09	2.6e-05	TRUE	0.44
Uterus	PHF20	20	rs6060369	-6.38	rs13038012	2.98	-5.93333	278	-5.93333	2.97e-09	5.06e-05	TRUE	0.77
Adipose_Subcutaneous	ADNP-AS1	20	rs7274624	-8.91	rs7274624	-3.02	-8.9091	476	8.90909	5.15e-19	1.04e-14	TRUE	0.05
Esophagus_Gastroesophageal_Junction	BCAS1	20	rs6097632	10.88	rs6097591	3.5	-4	560	-6.85	7.62e-12	1.4e-07	TRUE	-0.43
Kidney_Cortex	RP4-724E16.2	20	rs6097632	10.88	rs6022582	2.99	0.5424	568	5.5723	2.51e-08	0.000404587	TRUE	0.35
Prostate	ZNF217	20	rs6097632	10.88	rs6022755	-3.49	-6.51667	600	7.28293	3.27e-13	6.24e-09	TRUE	0.4
Testis	AC006076.1	20	rs6097632	10.88	rs6022781	5.56	-6.4655	617	-6.66863	2.58e-11	7.11e-07	TRUE	-0.56
Thyroid	RP4-724E16.2	20	rs6097632	10.88	rs6068585	-5.42	-4.7791	572	5.9778	2.26e-09	4.85e-05	TRUE	0.08
Adipose_Visceral_Omentum	RTEL1	20	rs1058319	-14.16	rs2297437	-5.7	-2.0556	430	8.82054	1.14e-18	2.21e-14	TRUE	0.06
Adrenal_Gland	SLC2A4RG	20	rs1058319	-14.16	rs4299387	-3.99	7.7586	439	-7.75862	8.59e-15	1.52e-10	TRUE	-0.11
Artery_Aorta	COL20A1	20	rs1058319	-14.16	rs8116164	3.33	0.52174	488	-8.2613	1.44e-16	2.71e-12	TRUE	0.27
Artery_Coronary	RTEL1	20	rs1058319	-14.16	rs6010620	-5.18	-8.5821	429	9.5491	1.31e-21	2.31e-17	TRUE	-0.57
Artery_Tibial	PSMA7	20	rs4925239	-7.48	rs6089369	-2.44	-7.0833	529	7.08333	1.41e-12	2.68e-08	TRUE	0.05
Breast_Mammary_Tissue	TPD52L2	20	rs1058319	-14.16	rs3761121	-2.73	9.1364	417	-9.13636	6.46e-20	1.27e-15	TRUE	0.02
Cells_Cultured_fibroblasts	RTEL1	20	rs1058319	-14.16	rs6011011	4.16	2.2427	429	7.57003	3.73e-14	6.73e-10	TRUE	-0.3
Heart_Atrial_Appendage	HELZ2	20	rs1058319	-14.16	rs6062344	-2.77	0.931	441	-6.56988	5.04e-11	9.06e-07	TRUE	0.32
Heart_Atrial_Appendage	FNDC11	20	rs1058319	-14.16	rs6122476	-3.37	-5.1818	434	5.18182	2.2e-07	0.00395626	TRUE	-0.08
Ovary	LSM14B	20	rs4925239	-7.48	rs28690399	-2.86	-1.5574	539	5.04638	4.5e-07	0.00802665	TRUE	0.06
Skin_Sun_Exposed_Lower_leg	CTD-3184A7.4	20	rs1058319	-14.16	rs1058319	-2.81	-14.1647	428	14.2	1.51e-45	3.15e-41	TRUE	-0.47
Thyroid	SLC2A4RG	20	rs1058319	-14.16	rs1741708	-8.67	-10.3134	439	10.3134	6.13e-25	1.32e-20	TRUE	-0.57
Whole_Blood	TNFRSF6B	20	rs1058319	-14.16	rs3761121	-4.66	9.1364	429	-9.1364	6.46e-20	1.05e-15	TRUE	-0.09
Whole_Blood	RP11-93B14.6	20	rs4925239	-7.48	rs6089369	-3.63	-7.0833	534	7.3437	2.08e-13	3.38e-09	TRUE	-0.01
Adipose_Visceral_Omentum	AGPAT3	21	rs2070548	5.8	rs4819338	-3.67	5.5965	262	-5.59649	2.19e-08	0.000423809	TRUE	-0.02
Adrenal_Gland	CBR3	21	rs2409758	5.9	rs2835289	-3.37	4.7966	500	-5.3282	9.92e-08	0.00175286	TRUE	0.02
Artery_Coronary	AATBC	21	rs2070548	5.8	rs2838429	-3.53	-5.1017	287	5.10169	3.37e-07	0.00594131	TRUE	0
Artery_Tibial	CBR3	21	rs2409758	5.9	rs2242810	-6.59	4.8	500	-4.8	1.59e-06	0.0302164	TRUE	0.01
Brain_Anterior_cingulate_cortex_BA24	CBR3	21	rs2409758	5.9	rs2409758	-5.2	5.8983	500	-5.89831	3.67e-09	6.3e-05	TRUE	-0.04
Brain_Caudate_basal_ganglia	ICOSLG	21	rs2070548	5.8	rs2070565	-4.97	-1.129	403	4.7737	1.81e-06	0.0327248	TRUE	0
Brain_Frontal_Cortex_BA9	MORC3	21	rs2409758	5.9	rs2073601	2.15	5.322	529	5.322	1.03e-07	0.00182928	TRUE	-0.04
Brain_Hippocampus	CBR3	21	rs2409758	5.9	rs2835289	-3.43	4.7966	500	-4.79661	1.61e-06	0.027267	TRUE	-0.04
Brain_Nucleus_accumbens_basal_ganglia	PDXK	21	rs2070548	5.8	rs17175686	-2.4	-4.959	274	4.959	7.09e-07	0.0128839	TRUE	0.03
Brain_Substantia_nigra	CBR3	21	rs2409758	5.9	rs2409758	-4.03	5.8983	496	-5.8983	3.67e-09	5.91e-05	TRUE	-0.03
Cells_EBV-transformed_lymphocytes	RCAN1	21	rs733014	4.84	rs733014	-4.11	4.8448	482	-4.8448	1.27e-06	0.0201295	TRUE	-0.05
Colon_Transverse	PDXK	21	rs2070548	5.8	rs17175686	2.96	-4.959	273	-4.76312	1.91e-06	0.0367236	TRUE	-0.01
Esophagus_Mucosa	TRPM2	21	rs2070548	5.8	rs2070546	-2.99	5.7833	407	-6.2556	3.96e-10	7.64e-06	TRUE	0.01
Liver	TMPRSS2	21	rs9984523	-10.33	rs9305744	3.13	5.23438	731	5.09123	3.56e-07	0.00567037	TRUE	0
Lung	RRP1B	21	rs2070548	5.8	rs3737358	-3.03	3.5306	281	5.1744	2.29e-07	0.00474717	TRUE	0.02
Minor_Salivary_Gland	TRAPPC10	21	rs2070548	5.8	rs17175686	-2.47	-4.959	279	4.95902	7.09e-07	0.0125018	TRUE	-0.03
Nerve_Tibial	RIMKLBP1	21	rs2409758	5.9	rs4817775	-2.88	4.875	512	-4.875	1.09e-06	0.0231897	TRUE	0.03
Pituitary	CBR1	21	rs2409758	5.9	rs2156407	6.3	-4.2459	510	-4.76886	1.85e-06	0.037309	TRUE	0.02
Prostate	AF064858.6	21	rs2836754	5.62	rs2836757	3.47	4.6508	643	5.7244	1.04e-08	0.000198328	TRUE	0.03
Skin_Not_Sun_Exposed_Suprapubic	MEMO1P1	21	rs2409758	5.9	rs2835281	-4.6	4.7241	497	-4.72414	2.31e-06	0.0471379	TRUE	0
Spleen	CBR3	21	rs2409758	5.9	rs4817775	-3.11	4.875	500	-4.875	1.09e-06	0.0208702	TRUE	0.04
Adipose_Visceral_Omentum	MRPL40	22	rs1978060	-9	rs5748432	-2.84	-5.0678	536	5.0678	4.02e-07	0.0077795	TRUE	-0.2
Brain_Anterior_cingulate_cortex_BA24	ARVCF	22	rs1978060	-9	rs5993830	-3.19	-5.0862	549	5.08621	3.65e-07	0.00626085	TRUE	-0.32
Brain_Nucleus_accumbens_basal_ganglia	GNB1L	22	rs1978060	-9	rs11704083	5.32	-0.1754	565	-5.53875	3.05e-08	0.000554246	TRUE	0.74
Brain_Spinal_cord_cervical_c-1	SEPT5	22	rs1978060	-9	rs1978060	-3.14	-9	587	9	2.26e-19	3.9e-15	TRUE	-0.4
Brain_Substantia_nigra	TBX1	22	rs1978060	-9	rs2269726	-2.78	-5.20339	586	5.20339	1.96e-07	0.00315834	TRUE	-0.24
Heart_Left_Ventricle	CLDN5	22	rs1978060	-9	rs2238778	2.46	-7.3036	591	-7.3	2.8e-13	4.55e-09	TRUE	0.17
Minor_Salivary_Gland	TBX1	22	rs1978060	-9	rs1978060	3.34	-9	585	-9	2.26e-19	3.99e-15	TRUE	0.24
Muscle_Skeletal	TBX1	22	rs1978060	-9	rs5993820	-4.39	4.7627	589	-4.76271	1.91e-06	0.033001	TRUE	0.26
Adipose_Subcutaneous	CTA-292E10.6	22	rs5997401	6.07	rs6005861	2.96	6.0513	326	6.05128	1.44e-09	2.9e-05	TRUE	0.41
Brain_Amygdala	GAL3ST1	22	rs5763767	5.96	rs1046199	3.35	1.4	431	4.8	1.62e-06	0.0268839	TRUE	0.02
Brain_Anterior_cingulate_cortex_BA24	RP4-539M6.22	22	rs5763767	5.96	rs12537	-3.05	4.8276	442	-5.96791	2.4e-09	4.12e-05	TRUE	-0.08
Brain_Caudate_basal_ganglia	RP4-539M6.22	22	rs5763767	5.96	rs41168	3.08	-4.67797	444	-5.72052	1.06e-08	0.000191648	TRUE	-0.02
Brain_Substantia_nigra	CCDC117	22	rs5997401	6.07	rs134514	3.17	4.03659	318	5.31838	1.05e-07	0.00169197	TRUE	0.7
Cells_EBV-transformed_lymphocytes	ASCC2	22	rs5763767	5.96	rs1468177	3.35	4.87719	377	4.87719	1.08e-06	0.017118	TRUE	0.06
Colon_Sigmoid	LIF	22	rs5763767	5.96	rs2412970	3.59	5.94545	429	5.78	7.32e-09	0.000135779	TRUE	0.05
Colon_Transverse	UQCR10	22	rs5763767	5.96	rs5763825	-2.31	5.11364	372	-5.82609	5.67e-09	0.000109017	TRUE	-0.11
Lung	CHEK2	22	rs5997401	6.07	rs17882647	3.02	0.6071	306	-6.47967	9.19e-11	1.91e-06	TRUE	-0.66
Pituitary	AC002059.10	22	rs6005923	5.56	rs5752960	-2.61	3.4	416	-4.93172	8.15e-07	0.0164361	TRUE	-0.09
Testis	HORMAD2	22	rs5763767	5.96	rs12537	-3.31	4.8276	409	-4.83	1.38e-06	0.0380452	TRUE	-0.05
Adipose_Subcutaneous	UQCRFS1P1	22	rs9607685	8.51	rs6001749	-1.88	7.6212	307	-7.62121	2.51e-14	5.05e-10	TRUE	-0.04
Adipose_Visceral_Omentum	UQCRFS1P1	22	rs9607685	8.51	rs5750871	3.12	1.36496	309	5.85569	4.75e-09	9.19e-05	TRUE	0.06
Artery_Aorta	SGSM3	22	rs9607685	8.51	rs17406434	-2.99	-5.1695	310	8.73266	2.49e-18	4.69e-14	TRUE	0.08
Brain_Cerebellar_Hemisphere	RP1-47A17.1	22	rs5759167	-23.78	rs138957	-2.91	-6.5294	509	6.35483	2.09e-10	3.94e-06	TRUE	-0.44
Brain_Cerebellar_Hemisphere	RP3-496C20.1	22	rs9607685	8.51	rs2958659	2.85	-5.1333	302	-5.13333	2.85e-07	0.00537738	TRUE	-0.01
Brain_Hippocampus	RIBC2	22	rs5766632	-5.21	rs1569414	-3.56	-5.0968	575	5.09677	3.45e-07	0.00584292	TRUE	0.05
Brain_Hypothalamus	RP5-1042K10.13	22	rs9607685	8.51	rs2958659	2.05	-5.1333	297	-5.13	2.85e-07	0.00495843	TRUE	-0.06
Brain_Putamen_basal_ganglia	TTLL1	22	rs5759167	-23.78	rs2072883	4.22	-8.4643	551	-7.44246	9.88e-14	1.7e-09	TRUE	0.41
Brain_Substantia_nigra	TTLL12	22	rs5759167	-23.78	rs47340	3.45	10.9649	557	8.39345	4.72e-17	7.61e-13	TRUE	-0.12
Brain_Substantia_nigra	SGSM3	22	rs9607685	8.51	rs6001722	2.6	7.95082	310	7.95082	1.85e-15	2.98e-11	TRUE	0.03
Brain_Substantia_nigra	AL022476.2	22	rs5759167	-23.78	rs9620142	3.37	-0.62099	549	5.47125	4.47e-08	0.000720296	TRUE	-0.29
Colon_Sigmoid	AL022476.2	22	rs5759167	-23.78	rs4988366	3.7	-15.954	550	-16	2.67e-57	4.95e-53	TRUE	-0.42
Colon_Transverse	ADSL	22	rs9607685	8.51	rs9611267	2.95	7.68182	304	7.68182	1.57e-14	3.02e-10	TRUE	-0.03
Esophagus_Muscularis	JOSD1	22	rs16999297	-4.93	rs3761455	3.29	-4.87317	373	-5.00539	5.57e-07	0.0106666	TRUE	0.04
Esophagus_Muscularis	RP3-370M22.8	22	rs9607685	8.51	rs2267423	-3.07	4.98413	303	-4.98413	6.22e-07	0.0119113	TRUE	-0.02
Lung	BIK	22	rs5759167	-23.78	rs4988366	-4.73	-15.954	557	24.0955	2.79e-128	5.78e-124	TRUE	-0.61
Muscle_Skeletal	TSPO	22	rs5759167	-23.78	rs1076922	3.53	-6.1613	557	-6.16129	7.22e-10	1.25e-05	TRUE	0
Ovary	Z82214.2	22	rs5759167	-23.78	rs4988443	3.1	6.107	546	6.10695	1.02e-09	1.82e-05	TRUE	-0.06
Pituitary	RP3-496C20.1	22	rs9607685	8.51	rs136805	-3.12	-0.1515	302	-4.97918	6.39e-07	0.0128867	TRUE	-0.09
Prostate	MCAT	22	rs5759167	-23.78	rs2413748	3.65	-15.6207	557	-15.6207	5.26e-55	1e-50	TRUE	-0.19
Prostate	TSPO	22	rs5759167	-23.78	rs6973	3.02	-6.72308	557	-6.72308	1.78e-11	3.39e-07	TRUE	-0.01
Skin_Not_Sun_Exposed_Suprapubic	TTLL1	22	rs5759167	-23.78	rs2072883	6.19	-8.4643	552	-8.46429	2.58e-17	5.26e-13	TRUE	0.5
Thyroid	BIK	22	rs5759167	-23.78	rs4988366	-9.59	-15.954	560	16.3975	1.99e-60	4.27e-56	TRUE	-0.23
Vagina	RP1-47A17.1	22	rs5759167	-23.78	rs4988366	-2.33	-15.954	510	15.954	2.67e-57	4.65e-53	TRUE	-0.06
Pancreas	SATB1-AS1	3	rs13434240	5.48	rs714141	-4.67	-2.76271	362	4.70833	2.5e-06	0.04325	TRUE	0
Prostate	SATB1	3	rs13434240	5.48	rs9847248	2.69	-5.2459	363	-5.2459	1.56e-07	0.00297492	TRUE	0.32
Liver	PARP15	3	rs10222633	-4.12	rs6801248	-3.74	-1.59	501	4.76	1.9e-06	0.0302632	TRUE	0.04
Adrenal_Gland	MCM2	3	rs981446	12.41	rs17282209	4.02	11.2353	464	6.40175	1.54e-10	2.72e-06	TRUE	0.26
Artery_Aorta	TMED10P2	3	rs4857841	15.97	rs2659690	2.72	-5.27119	361	-5.27119	1.36e-07	0.00256319	TRUE	-0.03
Artery_Coronary	GATA2	3	rs4857841	15.97	rs7650365	-2.6	-11.5179	361	11.5179	1.07e-30	1.89e-26	TRUE	0.69
Artery_Tibial	TMCC1	3	rs6439204	4.93	rs11716060	-2.35	2.4918	282	-5.12435	2.99e-07	0.0056822	TRUE	-0.06
Brain_Spinal_cord_cervical_c-1	FTH1P4	3	rs4857841	15.97	rs3828417	2.05	6.9709	339	6.97	3.15e-12	5.44e-08	TRUE	0.21
Colon_Transverse	RAB7A	3	rs4857841	15.97	rs17343355	2.9	-11.6786	346	-11.6786	1.64e-31	3.15e-27	TRUE	-0.52
Nerve_Tibial	GATA2	3	rs4857841	15.97	rs2335052	3.4	-7.32895	361	-7.32895	2.32e-13	4.94e-09	TRUE	0.26
Prostate	ACPP	3	rs982582	-6.34	rs982582	6.09	-6.34375	484	-6.1912	5.97e-10	1.14e-05	TRUE	-0.01
Skin_Not_Sun_Exposed_Suprapubic	RUVBL1	3	rs4857841	15.97	rs9876104	4.22	5.46032	419	6.0055	1.91e-09	3.9e-05	TRUE	0.11
Skin_Sun_Exposed_Lower_leg	RUVBL1	3	rs4857841	15.97	rs998392	5.28	7.0317	418	5.49988	3.8e-08	0.000791692	TRUE	0.06
Testis	PODXL2	3	rs7641133	15.23	rs12495781	2.63	5.08772	434	5.08772	3.62e-07	0.00997998	TRUE	-0.05
Uterus	LINC01565	3	rs4857841	15.97	rs9864697	-2.62	1.3487	350	-4.72886	2.26e-06	0.0384697	TRUE	-0.19
Brain_Caudate_basal_ganglia	ARMC8	3	rs12497610	-6.67	rs6798439	2.39	-5.0462	356	-5.04615	4.51e-07	0.00815408	TRUE	0
Brain_Nucleus_accumbens_basal_ganglia	SLC35G2	3	rs6786302	-5.48	rs6439672	-3.3	-5.31667	337	5.56043	2.69e-08	0.000488827	TRUE	-0.03
Breast_Mammary_Tissue	SLC25A36	3	rs9846396	7.91	rs6773067	-3.12	1.90526	429	-7.17	7.46e-13	1.46e-08	TRUE	-0.4
Kidney_Cortex	ARMC8	3	rs12497610	-6.67	rs149999	2.088	-6.60345	356	-6.60345	4.02e-11	6.48e-07	TRUE	0.1
Ovary	NME9	3	rs12497610	-6.67	rs12497610	-2.17	-6.67241	305	6.67241	2.52e-11	4.49e-07	TRUE	-0.08
Skin_Sun_Exposed_Lower_leg	DHX36	3	rs17815430	-4.94	rs7641309	-5.14	3.5556	326	-5.6205	1.9e-08	0.000395846	TRUE	-0.05
Skin_Sun_Exposed_Lower_leg	P2RY1	3	rs17437371	-7.3	rs7634426	3.68	2.5269	345	4.79628	1.62e-06	0.0337511	TRUE	0
Testis	SUCNR1	3	rs10513423	-7.27	rs10513423	-3.55	-7.27083	403	7.27083	3.57e-13	9.84e-09	TRUE	-0.39
Adipose_Subcutaneous	RP11-816J6.3	3	rs6762609	-13.27	rs4955705	3	-8.88	411	-7.14	9.2e-13	1.85e-08	TRUE	-0.1
Adipose_Visceral_Omentum	PRKCI	3	rs10936633	14.04	rs17826507	5.94	3.22989	376	6.07	1.31e-09	2.54e-05	TRUE	0.27
Adrenal_Gland	ACTRT3	3	rs6762609	-13.27	rs9812475	-2.73	5.5921	411	-5.56334	2.65e-08	0.000468255	TRUE	-0.01
Artery_Coronary	MYNN	3	rs6762609	-13.27	rs17826483	-3.21	4.7913	413	-4.7913	1.66e-06	0.0292658	TRUE	-0.03
Brain_Amygdala	RPL22L1	3	rs10936633	14.04	rs1045210	-3.28	-13.5172	395	13.5172	1.24e-41	2.06e-37	TRUE	0.05
Brain_Putamen_basal_ganglia	LRRC34	3	rs6762609	-13.27	rs2901585	-2.9	-6.38596	413	6.38596	1.7e-10	2.92e-06	TRUE	0.17
Breast_Mammary_Tissue	RPL22L1	3	rs10936633	14.04	rs10936633	3.65	14.0364	395	14	9.34e-45	1.83e-40	TRUE	0.23
Breast_Mammary_Tissue	KRT8P13	3	rs10936633	14.04	rs1132237	2.9	5.46377	360	5.26	1.4e-07	0.0027468	TRUE	0.13
Cells_Cultured_fibroblasts	PHC3	3	rs10936633	14.04	rs6762609	-3.72	-13.2674	371	6.08625	1.16e-09	2.09e-05	TRUE	0.14
Cells_EBV-transformed_lymphocytes	TNFSF10	3	rs9883329	6.73	rs3181139	-3.13	-5.36364	473	7.315	2.57e-13	4.07e-09	TRUE	0.03
Colon_Sigmoid	CLDN11	3	rs10936633	14.04	rs9812475	-3.17	5.5921	382	-5.24704	1.55e-07	0.00287509	TRUE	-0.05
Esophagus_Mucosa	RP11-362K14.6	3	rs6762609	-13.27	rs1881984	2.71	-5.9661	414	-5.97	2.43e-09	4.69e-05	TRUE	0.01
Heart_Atrial_Appendage	SEC62	3	rs10936633	14.04	rs6797464	3.63	0.48	393	4.97389	6.56e-07	0.0117968	TRUE	0.13
Liver	FNDC3B	3	rs9859259	-6.6	rs3136601	3.39	-6.58182	460	-6.58	4.65e-11	7.41e-07	TRUE	-0.05
Liver	RP11-362K14.6	3	rs6762609	-13.27	rs3755608	3.56	4.95238	415	4.95	7.49e-07	0.0119301	TRUE	-0.08
Ovary	MECOM	3	rs12488988	-13.26	rs9812475	4.61	5.59211	421	5.84323	5.12e-09	9.13e-05	TRUE	0.05
Ovary	PHC3	3	rs10936633	14.04	rs6799994	2.88	-5.25688	371	-5.25688	1.47e-07	0.00262204	TRUE	-0.11
Prostate	RP11-469J4.3	3	rs10936633	14.04	rs1045210	3.67	-13.5172	383	-13.5172	1.24e-41	2.36e-37	TRUE	-0.02
Spleen	CLDN11	3	rs10936633	14.04	rs10936633	2.93	14.0364	382	14.0364	9.34e-45	1.79e-40	TRUE	0.13
Spleen	LRRC34	3	rs6762609	-13.27	rs9878797	-4.47	-7.7193	412	7.7193	1.17e-14	2.24e-10	TRUE	0.06
Testis	RP11-362K14.5	3	rs6762609	-13.27	rs7635067	-2.76	-0.66667	418	5.79103	7e-09	0.000192983	TRUE	-0.02
Artery_Tibial	KLHL6	3	rs7620457	-5.66	rs11719987	-3.22	-0.2634	468	-4.84741	1.25e-06	0.023755	TRUE	0.5
Brain_Putamen_basal_ganglia	EIF2B5	3	rs7620457	-5.66	rs2231224	3.28	0.28947	491	-5.14014	2.75e-07	0.00472203	TRUE	0.42
Kidney_Cortex	KLHL24	3	rs7620457	-5.66	rs7620457	-2.593	-5.65714	463	5.65714	1.54e-08	0.000248233	TRUE	-0.53
Kidney_Cortex	ABCC5	3	rs7620457	-5.66	rs12696518	3.023	-0.50833	476	4.86981	1.12e-06	0.0180533	TRUE	-0.6
Liver	CAMK2N2	3	rs7620457	-5.66	rs16858720	-2.99	1.13793	515	-4.98	6.3e-07	0.0100346	TRUE	0.56
Adrenal_Gland	UBE2E2	3	rs9872872	8.43	rs13098494	-3.75	4.988	373	-4.98795	6.1e-07	0.0107787	TRUE	0.06
Artery_Aorta	UBE2E2	3	rs9872872	8.43	rs603056	-3.42	3.23729	373	-5.67187	1.41e-08	0.000265743	TRUE	-0.45
Colon_Sigmoid	RPL24P7	3	rs9872872	8.43	rs9867201	-2.95	5.0893	365	-4.85645	1.2e-06	0.0222588	TRUE	-0.38
Colon_Transverse	UBE2E2	3	rs9872872	8.43	rs13068538	-3.69	5.33803	373	-7.00321	2.5e-12	4.81e-08	TRUE	-0.49
Skin_Sun_Exposed_Lower_leg	RPL15	3	rs9873329	5.1	rs13070136	3.59	4.9247	496	4.72191	2.34e-06	0.0487516	TRUE	0.25
Stomach	UBE2E2	3	rs9872872	8.43	rs7374735	-3.95	5.28571	373	-5.67436	1.39e-08	0.000248602	TRUE	-0.44
Testis	UBE2E2-AS1	3	rs9872872	8.43	rs13087234	5.55	5.39024	371	5.39024	7.04e-08	0.00194086	TRUE	0.49
Artery_Tibial	DAG1	3	rs9824435	7.01	rs4241405	-3.93	6.6933	289	-5.83299	5.44e-09	0.000103382	TRUE	-0.76
Brain_Amygdala	RASSF1-AS1	3	rs1996664	7	rs1283	2.57	4.68817	310	4.68817	2.76e-06	0.0458022	TRUE	-0.05
Brain_Anterior_cingulate_cortex_BA24	RP11-3B7.1	3	rs9824435	7.01	rs4955420	-4.11	3.9138	271	-4.8077	1.53e-06	0.0262441	TRUE	-0.6
Brain_Caudate_basal_ganglia	RP11-694I15.7	3	rs9824435	7.01	rs35713889	-2.78	0.4029	258	-5.36527	8.08e-08	0.00146086	TRUE	-0.63
Brain_Cortex	TMEM110	3	rs2336669	-4.2	rs2276817	2.29	-3.5938	378	-4.79412	1.63e-06	0.0302642	TRUE	-0.07
Brain_Spinal_cord_cervical_c-1	DALRD3	3	rs9831648	5.86	rs990211	-3.56	5.4429	263	-5.44	5.24e-08	0.000904424	TRUE	-0.47
Colon_Transverse	LAMB2	3	rs13096480	7	rs9883000	-1.51	6.97222	253	-6.97222	3.12e-12	6e-08	TRUE	0.17
Heart_Left_Ventricle	MAPKAPK3	3	rs1138536	5.16	rs1283	-3.05	4.68817	296	-4.69	2.76e-06	0.0448859	TRUE	-0.02
Brain_Hypothalamus	RP11-157F20.3	3	rs17793086	4.42	rs1344142	-2.94	-0.46429	396	-4.95536	7.22e-07	0.0125614	TRUE	-0.11
Brain_Caudate_basal_ganglia	RP11-154H23.4	3	rs830637	-4.78	rs830637	-3.88	-4.7818	530	4.78182	1.74e-06	0.0314592	TRUE	-0.02
Brain_Anterior_cingulate_cortex_BA24	LINC00506	3	rs4527381	19.27	rs6805890	2.68	-16	332	-16	1.28e-57	2.2e-53	TRUE	-0.33
Brain_Substantia_nigra	POU1F1	3	rs4527381	19.27	rs2003180	-3.81	-10.914	335	10.9175	9.51e-28	1.53e-23	TRUE	0.13
Breast_Mammary_Tissue	CHMP2B	3	rs4527381	19.27	rs13096954	-4.56	-5.63529	330	8.9	5.77e-19	1.13e-14	TRUE	0.37
Colon_Transverse	POU1F1	3	rs4527381	19.27	rs2047370	4.17	10.2414	337	9.68691	3.43e-22	6.59e-18	TRUE	0.67
Kidney_Cortex	LINC00506	3	rs4527381	19.27	rs2003180	-3.151	-10.914	335	10.914	9.88e-28	1.59e-23	TRUE	-0.67
Nerve_Tibial	LINC00506	3	rs4527381	19.27	rs17023900	-5.95	17.2913	341	-17.2913	5.47e-67	1.16e-62	TRUE	-0.09
Pituitary	LINC00506	3	rs4527381	19.27	rs7642134	-2.24	-5.9107	333	4.76223	1.91e-06	0.038519	TRUE	0.17
Thyroid	ZNF654	3	rs12485590	5.2	rs6769025	-2.08	5.17699	298	-5.17699	2.25e-07	0.00483165	TRUE	-0.06
Artery_Coronary	CCDC54	3	rs1283102	8.61	rs1283109	-3.68	7.40678	355	-7.40678	1.29e-13	2.27e-09	TRUE	-0.36
Brain_Amygdala	BBX	3	rs1283102	8.61	rs1283102	-3.3	8.60714	399	-8.60714	7.49e-18	1.24e-13	TRUE	-0.41
Brain_Caudate_basal_ganglia	DUBR	3	rs1283102	8.61	rs1283102	-4.84	8.6071	328	-8.60714	7.49e-18	1.35e-13	TRUE	-0.51
Brain_Caudate_basal_ganglia	LINC00882	3	rs1283102	8.61	rs9821094	-2.95	-5.3036	328	5.30357	1.14e-07	0.00206112	TRUE	0.66
Brain_Cortex	DUBR	3	rs1283102	8.61	rs1283101	-4.03	8.2982	328	-7.7928	6.55e-15	1.22e-10	TRUE	-0.7
Breast_Mammary_Tissue	LINC00636	3	rs10513196	6.47	rs1429	2.82	4.80357	427	4.8	1.56e-06	0.0306072	TRUE	-0.02
Esophagus_Gastroesophageal_Junction	RP11-446H18.6	3	rs1283102	8.61	rs9824049	-3.18	5.8906	341	-5.89063	3.85e-09	7.08e-05	TRUE	0.09
Heart_Left_Ventricle	RP11-446H18.1	3	rs1283102	8.61	rs1283101	3.23	8.29825	342	8.3	1.06e-16	1.72e-12	TRUE	0.24
Nerve_Tibial	CCDC54	3	rs1283102	8.61	rs11706666	6.38	-4.91228	356	-4.94087	7.78e-07	0.0165519	TRUE	-0.18
Ovary	LINC01990	3	rs1283102	8.61	rs9842375	2.7	6.23438	369	6.23437	4.54e-10	8.1e-06	TRUE	0.22
Prostate	BBX	3	rs1283102	8.61	rs10511263	2.87	-4.70175	399	-4.7021	2.57e-06	0.0490099	TRUE	-0.18
Brain_Caudate_basal_ganglia	RP11-553D4.2	3	rs7611694	-14.77	rs9844111	2.85	-6.4091	425	-6.40909	1.46e-10	2.64e-06	TRUE	0.26
Brain_Caudate_basal_ganglia	GRAMD1C	3	rs7611694	-14.77	rs2654763	2.73	1.6809	384	6.11988	9.36e-10	1.69e-05	TRUE	-0.21
Breast_Mammary_Tissue	CFAP44	3	rs7611694	-14.77	rs6775574	-6.69	-10.8036	436	10.7	8.74e-27	1.71e-22	TRUE	-0.64
Heart_Left_Ventricle	GRAMD1C	3	rs7611694	-14.77	rs7646203	-3.82	-1.23438	385	4.96	7.21e-07	0.0117256	TRUE	-0.2
Liver	SIDT1	3	rs7611694	-14.77	rs7611694	3.52	-14.7679	436	-14.8	2.36e-49	3.76e-45	TRUE	0.73
Lung	RP11-553D4.2	3	rs7611694	-14.77	rs13059888	4	5.8409	426	5.84	5.19e-09	0.000107589	TRUE	-0.64
Small_Intestine_Terminal_Ileum	CFAP44	3	rs7611694	-14.77	rs7623122	-4.86	-11.625	436	9.0584	1.32e-19	2.42e-15	TRUE	-0.54
Vagina	CFAP44	3	rs7611694	-14.77	rs16861165	-3.16	-5.53982	434	5.53982	3.03e-08	0.000528008	TRUE	-0.53
Ovary	TLR6	4	rs337638	3.83	rs7687994	3.02	-2.64179	513	-5.20714	1.92e-07	0.0034247	TRUE	-0.39
Adipose_Subcutaneous	COX18	4	rs13120821	-9.15	rs2045680	2.59	5	303	5	5.73e-07	0.0115225	TRUE	-0.05
Artery_Coronary	ANKRD17	4	rs13120821	-9.15	rs6446910	-3.5	-6.69091	311	6.69091	2.22e-11	3.91e-07	TRUE	0
Brain_Amygdala	CCNI	4	rs344122	6.46	rs903044	-3.24	5.22951	535	-5.22951	1.7e-07	0.00282115	TRUE	0.02
Brain_Anterior_cingulate_cortex_BA24	HMGA1P2	4	rs13120821	-9.15	rs16849151	-2.63	-5.05063	313	8.83705	9.83e-19	1.69e-14	TRUE	0.21
Brain_Hippocampus	ANKRD17	4	rs13120821	-9.15	rs13101277	3.85	4.375	311	7.05882	1.68e-12	2.85e-08	TRUE	0.11
Brain_Hypothalamus	ALB	4	rs13120821	-9.15	rs6858087	2.04	7.1122	303	7.11224	1.14e-12	1.98e-08	TRUE	0.37
Esophagus_Muscularis	CCNI	4	rs344122	6.46	rs11097670	-2.887	0.51724	535	-5.45289	4.96e-08	0.00094984	TRUE	0.02
Muscle_Skeletal	COX18	4	rs13120821	-9.15	rs13120821	2.92	-9.1504	304	-9.1504	5.67e-20	9.8e-16	TRUE	0.38
Skin_Not_Sun_Exposed_Suprapubic	RP11-359D14.2	4	rs344122	6.46	rs10014906	3.57	-4.8	502	-4.8	1.59e-06	0.0324455	TRUE	0.05
Testis	PF4	4	rs1894292	-8.839	rs1247583	-3.5	-6.81818	337	6.81818	9.22e-12	2.54e-07	TRUE	0.27
Uterus	RASSF6	4	rs13120821	-9.15	rs13120821	3.23	-9.1504	281	-9.15038	5.67e-20	9.65e-16	TRUE	0.45
Uterus	ADAMTS3	4	rs1381015	7.86	rs7698530	4.02	4.9167	310	4.91667	8.8e-07	0.0149794	TRUE	-0.15
Adipose_Subcutaneous	PDLIM5	4	rs12639623	13.58	rs2452601	5.16	12.2182	388	12.2182	2.49e-34	5.01e-30	TRUE	0.73
Brain_Hippocampus	BMPR1B-AS1	4	rs12639623	13.58	rs2452554	-2.21	-7.9848	414	7.98485	1.41e-15	2.39e-11	TRUE	0.46
Esophagus_Mucosa	PDLIM5	4	rs12639623	13.58	rs2452554	-3.61	-7.9848	389	10.8959	1.21e-27	2.33e-23	TRUE	0.59
Kidney_Cortex	SMARCAD1	4	rs12639623	13.58	rs7658602	-2.63	1.8	378	8.45214	2.86e-17	4.61e-13	TRUE	0.64
Liver	SMARCAD1	4	rs12639623	13.58	rs11097417	2.98	-3.3929	388	-5.24805	1.54e-07	0.00245291	TRUE	-0.13
Ovary	HPGDS	4	rs12639623	13.58	rs2452563	-2.22	7.89091	363	-7.89091	3e-15	5.35e-11	TRUE	-0.75
Skin_Not_Sun_Exposed_Suprapubic	SMARCAD1	4	rs12639623	13.58	rs6847989	-4.66	-3.5818	388	7.3704	1.7e-13	3.47e-09	TRUE	0.23
Adipose_Subcutaneous	TET2	4	rs7679673	-21.09	rs4698934	-3.82	8.30263	381	-6.74848	1.49e-11	3e-07	TRUE	0.36
Artery_Coronary	TET2	4	rs7679673	-21.09	rs2214409	2.58	-7.03636	379	-7.03636	1.97e-12	3.47e-08	TRUE	0.57
Brain_Cerebellar_Hemisphere	EEF1A1P9	4	rs7679673	-21.09	rs2726491	-2.1	9	396	-9	2.26e-19	4.26e-15	TRUE	0.49
Cells_EBV-transformed_lymphocytes	PPA2	4	rs7679673	-21.09	rs17008180	-3.57	-9.1728	397	8.61055	7.27e-18	1.15e-13	TRUE	-0.3
Colon_Sigmoid	CXXC4	4	rs17035162	5.29	rs1875310	-3.24	-4.9853	319	4.98529	6.19e-07	0.0114818	TRUE	-0.09
Colon_Transverse	ARHGEF38	4	rs7679673	-21.09	rs11097888	-2.98	-0.6405	416	-6.63623	3.22e-11	6.19e-07	TRUE	0.29
Esophagus_Mucosa	TET2	4	rs7679673	-21.09	rs13151168	-3.31	3.5205	381	-6.09078	1.12e-09	2.16e-05	TRUE	0.15
Ovary	EEF1A1P9	4	rs7679673	-21.09	rs6533210	3.19	-4.76531	397	-4.76357	1.9e-06	0.0338903	TRUE	0.24
Skin_Not_Sun_Exposed_Suprapubic	RP11-311D14.1	4	rs2007403	-19.7	rs7698522	-2.76	6.6207	398	-6.49436	8.34e-11	1.7e-06	TRUE	0.18
Small_Intestine_Terminal_Ileum	AC004069.2	4	rs7679673	-21.09	rs7679673	-3.26	-21.0893	380	21.0893	9.98e-99	1.83e-94	TRUE	-0.76
Whole_Blood	EEF1A1P9	4	rs7679673	-21.09	rs2726491	-2.51	9	400	-9	2.26e-19	3.68e-15	TRUE	0.31
Whole_Blood	PPA2	4	rs7679673	-21.09	rs6856615	8.61	5.2821	400	5.28205	1.28e-07	0.00208166	TRUE	0.19
Brain_Substantia_nigra	SETD7	4	rs6850591	7.75	rs1521491	-2.69	-6.4054	447	5.18166	2.2e-07	0.00354508	TRUE	0.3
Testis	MAML3	4	rs6850591	7.75	rs6851797	-6.64	7.71429	459	-7.71429	1.22e-14	3.36e-10	TRUE	-0.64
Ovary	RP11-6L6.4	4	rs719091	4.49	rs1991979	-5.57	3.61404	364	-4.84245	1.28e-06	0.0228314	TRUE	-0.06
Adipose_Subcutaneous	BRD9	5	rs10069690	-18.6	rs9637838	3.52	-1.0698	368	-5.0007	5.71e-07	0.0114822	TRUE	-0.03
Artery_Tibial	CLPTM1L	5	rs10069690	-18.6	rs2735948	4.44	-8.0702	474	-6.16085	7.24e-10	1.38e-05	TRUE	0.18
Brain_Cerebellar_Hemisphere	NDUFS6	5	rs10866528	14.93	rs1994388	3.07	6.65217	608	6.65217	2.89e-11	5.45e-07	TRUE	-0.06
Brain_Cerebellum	CTD-2012J19.2	5	rs10069690	-18.6	rs10866528	-3.69	14.9286	561	-9.56296	1.14e-21	2.25e-17	TRUE	0.01
Colon_Transverse	TERT	5	rs10069690	-18.6	rs401681	-3.26	-6.6786	444	6.67857	2.41e-11	4.63e-07	TRUE	-0.14
Esophagus_Mucosa	IRX4	5	rs10866528	14.93	rs11746674	-7.69	0.6724	637	8.79018	1.49e-18	2.87e-14	TRUE	0.07
Kidney_Cortex	NKD2	5	rs10069690	-18.6	rs10068558	2.86	3.1475	366	8.8232	1.11e-18	1.79e-14	TRUE	-0.3
Lung	NKD2	5	rs10069690	-18.6	rs4975605	2.53	5.62069	367	5.62069	1.9e-08	0.00039387	TRUE	0.24
Prostate	CTD-2194D22.3	5	rs10866528	14.93	rs12653946	-5.49	14.9107	635	-14.9107	2.81e-50	5.36e-46	TRUE	-0.05
Skin_Not_Sun_Exposed_Suprapubic	IRX4	5	rs10866528	14.93	rs12653946	7.19	14.9107	636	11.9569	5.97e-33	1.22e-28	TRUE	0.09
Skin_Sun_Exposed_Lower_leg	IRX4	5	rs10866528	14.93	rs12653946	8.76	14.9107	636	13.1445	1.83e-39	3.81e-35	TRUE	0.09
Skin_Sun_Exposed_Lower_leg	TERT	5	rs10069690	-18.6	rs2853676	-4.72	-8.5156	441	6.37406	1.84e-10	3.83e-06	TRUE	-0.36
Thyroid	RP11-43F13.4	5	rs10069690	-18.6	rs4975605	-3.382	5.62069	366	-5.33	9.97e-08	0.00214096	TRUE	0.08
Adipose_Subcutaneous	SUDS3P1	5	rs477842	6.84	rs477842	3.03	6.8393	355	6.83929	7.96e-12	1.6e-07	TRUE	0.59
Brain_Amygdala	RP11-281O15.4	5	rs13159176	6.35	rs535858	-3.81	4.725	556	-4.725	2.3e-06	0.0381685	TRUE	-0.15
Brain_Cerebellar_Hemisphere	COL23A1	5	rs477842	6.84	rs2973741	-6.88	-6.43103	563	6.37737	1.8e-10	3.4e-06	TRUE	0.17
Brain_Cerebellum	ZNF354A	5	rs477842	6.84	rs13187034	-3.78	4.63542	586	-5.95142	2.66e-09	5.26e-05	TRUE	-0.25
Brain_Cerebellum	COL23A1	5	rs477842	6.84	rs2973739	-7.68	-5.77586	566	5.77586	7.66e-09	0.000151454	TRUE	0.26
Brain_Spinal_cord_cervical_c-1	ZFP2	5	rs477842	6.84	rs10075301	-3.5	0.4177	565	4.99818	5.79e-07	0.00999354	TRUE	0.42
Esophagus_Mucosa	RP11-423H2.4	5	rs477842	6.84	rs7722612	-3.17	5.5667	353	-5.56667	2.6e-08	0.000501514	TRUE	-0.12
Kidney_Cortex	HNRNPAB	5	rs477842	6.84	rs17648414	3.21	6.2414	417	6.24138	4.34e-10	7e-06	TRUE	0.72
Muscle_Skeletal	COL23A1	5	rs477842	6.84	rs2973741	-6.24	-6.431	565	7.88394	3.17e-15	5.48e-11	TRUE	0.24
Skin_Not_Sun_Exposed_Suprapubic	PHYKPL	5	rs477842	6.84	rs11959914	3.33	6.1034	427	5.21361	1.85e-07	0.00377511	TRUE	0.48
Stomach	COL23A1	5	rs477842	6.84	rs195808	3.74	4.0328	564	5.07765	3.82e-07	0.00683207	TRUE	0.57
Uterus	RN7SKP70	5	rs477842	6.84	rs10069282	-3.82	6.1	566	-6.1	1.06e-09	1.8e-05	TRUE	-0.46
Whole_Blood	COL23A1	5	rs477842	6.84	rs1106073	-8.21	-2.8714	566	4.94364	7.67e-07	0.0124737	TRUE	0.36
Brain_Amygdala	TMEM267	5	rs1624415	-6.55	rs779850	-1.74	-5.0135	261	5.01351	5.34e-07	0.00886173	TRUE	-0.02
Brain_Cortex	CTD-2636A23.2	5	rs1624415	-6.55	rs4443426	3.5	-4.96491	316	-5.00925	5.46e-07	0.0101376	TRUE	0.03
Brain_Frontal_Cortex_BA9	RP11-159F24.5	5	rs1624415	-6.55	rs2444779	-1.95	-6.39683	255	6.39683	1.59e-10	2.82e-06	TRUE	-0.05
Brain_Nucleus_accumbens_basal_ganglia	ANXA2R	5	rs1624415	-6.55	rs2444779	-2.97	-6.3968	328	6.77687	1.23e-11	2.24e-07	TRUE	0.08
Brain_Spinal_cord_cervical_c-1	PAIP1	5	rs1624415	-6.55	rs6451674	-1.64	5.0678	242	-5.0678	4.02e-07	0.00693852	TRUE	-0.03
Kidney_Cortex	NNT-AS1	5	rs1624415	-6.55	rs10805671	-2.56	-4.2586	254	5.13576	2.81e-07	0.00452944	TRUE	-0.03
Uterus	FGF10-AS1	5	rs1482680	7.12	rs6871916	-2.58	-0.59043	245	-6.5618	5.32e-11	9.06e-07	TRUE	-0.74
Uterus	TMEM267	5	rs1624415	-6.55	rs922439	2.23	5.79688	254	5.79688	6.76e-09	0.000115069	TRUE	0.05
Cells_Cultured_fibroblasts	FST	5	rs155783	5.34	rs4409046	4.72	-4.8286	442	-4.82857	1.38e-06	0.0248993	TRUE	0.03
Lung	IQGAP2	5	rs11741153	5.39	rs4296785	-4.43	5.24658	570	-5.24658	1.55e-07	0.00321315	TRUE	-0.25
Artery_Aorta	RP11-215P8.2	5	rs7701346	-10.98	rs4958241	2.56	-10.8393	292	-10.8	2.24e-27	4.22e-23	TRUE	0.2
Brain_Cortex	RP11-215P8.3	5	rs7701346	-10.98	rs11747528	1.89	-4.8871	290	-4.8871	1.02e-06	0.0189383	TRUE	0.22
Colon_Transverse	JADE2	5	rs7701346	-10.98	rs1476097	-3.67	6.9655	290	-6.96552	3.27e-12	6.29e-08	TRUE	0.62
Heart_Left_Ventricle	LINC01843	5	rs7701346	-10.98	rs329317	2.76	4.1897	273	4.76713	1.87e-06	0.0304118	TRUE	-0.07
Liver	Y_RNA	5	rs3900945	-4.19	rs154735	2.53	-0.0841	428	-4.96479	6.88e-07	0.0109585	TRUE	0
Testis	RP11-215P8.3	5	rs7701346	-10.98	rs1476097	-3.39	6.9655	279	-6.96552	3.27e-12	9.02e-08	TRUE	0.26
Muscle_Skeletal	STC2	5	rs10516098	-7.33	rs6891752	-4.11	5.5522	595	-5.55224	2.82e-08	0.00048724	TRUE	-0.05
Esophagus_Mucosa	FOXC1	6	rs7756485	6.51	rs2814811	-4.84	6.4828	660	-6.48276	9.01e-11	1.74e-06	TRUE	-0.38
Adipose_Visceral_Omentum	CEP57L1	6	rs12200578	9.74	rs3813499	3.52	8.6437	411	8.64368	5.44e-18	1.05e-13	TRUE	0.56
Artery_Aorta	CCDC162P	6	rs12200578	9.74	rs7746734	4.46	-0.5455	423	-5.08514	3.67e-07	0.00691685	TRUE	-0.42
Artery_Coronary	RP11-425D10.10	6	rs12200578	9.74	rs4946977	4.2	-0.66964	384	-5.5358	3.1e-08	0.00054653	TRUE	-0.18
Brain_Hypothalamus	BEND3	6	rs11967511	7.05	rs9486567	2.25	6.2838	376	6.28	3.3e-10	5.74e-06	TRUE	0.01
Muscle_Skeletal	CCDC162P	6	rs12200578	9.74	rs4142466	3.89	1.19868	423	5.80984	6.25e-09	0.000107988	TRUE	0.38
Pituitary	CEP57L1	6	rs12200578	9.74	rs3734649	-2.75	9.6341	411	-6.2267	4.76e-10	9.6e-06	TRUE	-0.69
Stomach	LINC00222	6	rs12200578	9.74	rs1260658	-4.03	4.9138	347	-4.91	8.93e-07	0.0159713	TRUE	0.06
Testis	FOXO3	6	rs12200578	9.74	rs13220810	-3.9	0.7941	355	-5.21039	1.88e-07	0.00518297	TRUE	-0.37
Thyroid	CEP57L1	6	rs12200578	9.74	rs1547325	-2.77	8.6092	411	-8.6092	7.36e-18	1.58e-13	TRUE	-0.67
Brain_Frontal_Cortex_BA9	FAM26E	6	rs339340	-14.77	rs11754507	3.08	-1.6594	369	-8.14022	3.95e-16	7.02e-12	TRUE	0.53
Brain_Frontal_Cortex_BA9	FAM162B	6	rs339340	-14.77	rs12209154	-3.39	-5.0737	376	5.07368	3.9e-07	0.0069264	TRUE	-0.38
Brain_Putamen_basal_ganglia	FAM162B	6	rs339340	-14.77	rs590572	3.09	5.54545	376	5.58523	2.33e-08	0.000400084	TRUE	-0.4
Brain_Spinal_cord_cervical_c-1	FAM26F	6	rs339340	-14.77	rs1741819	-3	-5.0323	379	5.03226	4.85e-07	0.0083711	TRUE	-0.09
Small_Intestine_Terminal_Ileum	CBX3P9	6	rs339340	-14.77	rs548101	2.63	6.3214	377	6.32143	2.59e-10	4.75e-06	TRUE	-0.12
Testis	FAM26D	6	rs339340	-14.77	rs9488931	2.3	0.7302	369	-4.9956	5.87e-07	0.016183	TRUE	0.32
Uterus	CBX3P9	6	rs339340	-14.77	rs984258	-3.02	3.1636	375	-6.22315	4.87e-10	8.29e-06	TRUE	0.41
Vagina	RFX6	6	rs339340	-14.77	rs513545	-2.73	-6.17054	397	6.17	6.81e-10	1.19e-05	TRUE	0.24
Artery_Aorta	L3MBTL3	6	rs6569648	-7.08	rs6569648	8.42	-7.0758	561	-7.07576	1.49e-12	2.81e-08	TRUE	0.73
Brain_Anterior_cingulate_cortex_BA24	TMEM200A	6	rs6569648	-7.08	rs6569647	-3.59	6.1594	499	-5.23586	1.64e-07	0.00281309	TRUE	0.18
Brain_Substantia_nigra	TMEM200A	6	rs6569648	-7.08	rs6569691	-2.84	-0.2093	495	5.3063	1.12e-07	0.00180477	TRUE	-0.45
Heart_Left_Ventricle	L3MBTL3	6	rs6569648	-7.08	rs9388768	4.95	-5.88136	561	-6.25396	4e-10	6.51e-06	TRUE	0.77
Artery_Tibial	TBPL1	6	rs6919121	-7.78	rs9321423	-4.1	-7.01667	433	7.01667	2.27e-12	4.31e-08	TRUE	-0.49
Cells_EBV-transformed_lymphocytes	SLC2A12	6	rs6919121	-7.78	rs9321423	-3.23	-7.01667	430	7.01667	2.27e-12	3.6e-08	TRUE	-0.35
Esophagus_Mucosa	SLC2A12	6	rs6919121	-7.78	rs9385675	3.39	-5.3387	429	-5.33871	9.36e-08	0.00180545	TRUE	0.34
Spleen	VIP	6	rs6557273	-11.6	rs11155869	-3.77	-0.661	577	4.74793	2.06e-06	0.0394428	TRUE	-0.24
Adipose_Visceral_Omentum	SNORA29	6	rs651164	-14.54	rs11757681	-4.19	-5.8571	562	5.85714	4.71e-09	9.11e-05	TRUE	-0.09
Brain_Cerebellar_Hemisphere	SNORA20	6	rs651164	-14.54	rs6455682	-3.05	9.59375	558	-9.59375	8.49e-22	1.6e-17	TRUE	-0.08
Brain_Cerebellar_Hemisphere	RP3-428L16.2	6	rs11751605	14.05	rs1782627	3.57	-5.14545	494	-5.14545	2.67e-07	0.00503776	TRUE	-0.13
Brain_Frontal_Cortex_BA9	MAP3K4	6	rs11751605	14.05	rs2465845	-3.01	6.4655	520	-6.46552	1.01e-10	1.79e-06	TRUE	-0.22
Brain_Hippocampus	RP3-428L16.1	6	rs388170	15.18	rs3798911	4.03	-5.3214	489	-5.32143	1.03e-07	0.00174441	TRUE	-0.16
Brain_Nucleus_accumbens_basal_ganglia	WTAP	6	rs651164	-14.54	rs9456490	-3.19	4.8769	537	-4.88	1.08e-06	0.0196258	TRUE	0.02
Colon_Sigmoid	PNLDC1	6	rs651164	-14.54	rs12204454	4.17	-7.1471	562	-7.14706	8.87e-13	1.65e-08	TRUE	0.28
Esophagus_Muscularis	SLC22A2	6	rs7740824	16.9	rs3125056	-5.65	12.9512	554	-12.9512	2.31e-38	4.42e-34	TRUE	-0.73
Heart_Atrial_Appendage	LPAL2	6	rs7740824	16.9	rs1564348	3.04	-5.48	552	-5.48	4.25e-08	0.000764278	TRUE	-0.09
Heart_Left_Ventricle	SLC22A1	6	rs7740824	16.9	rs3124787	-4.47	-6.62069	541	6.62069	3.58e-11	5.82e-07	TRUE	0.54
Ovary	ACAT2	6	rs651164	-14.54	rs6455680	3.41	5.9153	542	5.92256	3.17e-09	5.65e-05	TRUE	0.07
Pituitary	IGF2R	6	rs7740824	16.9	rs12202350	3.9	4.0968	599	8.332	7.95e-17	1.6e-12	TRUE	0.18
Prostate	LPA	6	rs7740824	16.9	rs7767705	3.9	-7.4627	539	-7.46269	8.48e-14	1.62e-09	TRUE	0.6
Small_Intestine_Terminal_Ileum	SOD2	6	rs651164	-14.54	rs3861973	2.51	-10.3968	544	-10.3968	2.56e-25	4.69e-21	TRUE	0.02
Stomach	TAGAP	6	rs7749123	-4.12	rs926657	-2.91	1.9091	567	-5.18	2.16e-07	0.00386316	TRUE	-0.13
Vagina	IGF2R	6	rs7740824	16.9	rs651164	3.07	-14.541	594	-14.5	6.66e-48	1.16e-43	TRUE	-0.12
Colon_Sigmoid	SMIM13	6	rs2018334	-8.27	rs2018334	-3.38	-8.2727	492	8.27273	1.31e-16	2.43e-12	TRUE	-0.62
Minor_Salivary_Gland	NEDD9	6	rs2018334	-8.27	rs2018334	2.95	-8.2727	614	-8.27273	1.31e-16	2.31e-12	TRUE	0.43
Pancreas	MAK	6	rs2018334	-8.27	rs6933123	-2.36	5.26984	473	-5.26984	1.37e-07	0.0023701	TRUE	-0.27
Vagina	NEDD9	6	rs2018334	-8.27	rs6457131	-3.26	-6.32836	615	6.33	2.48e-10	4.32e-06	TRUE	-0.27
Artery_Coronary	CASC15	6	rs9348465	-8.77	rs12203023	3.62	-4.80702	486	-4.9319	8.14e-07	0.0143508	TRUE	0.53
Breast_Mammary_Tissue	PRL	6	rs2182997	7.46	rs7765260	2.93	-3.6322	620	-5.49037	4.01e-08	0.000786762	TRUE	0.1
Esophagus_Mucosa	CASC15	6	rs9348465	-8.77	rs16901621	-3.7	-2.4177	487	5.46975	4.51e-08	0.000869934	TRUE	0.01
Heart_Left_Ventricle	CASC15	6	rs9348465	-8.77	rs17198949	-3.38	3.47143	487	-5.34621	8.98e-08	0.00146042	TRUE	-0.02
Pituitary	NBAT1	6	rs2182997	7.46	rs13197502	-3.32	-5.6875	560	5.6875	1.29e-08	0.000260154	TRUE	-0.14
Pituitary	SLC17A1	6	rs13212534	-5.63	rs1543680	4.4	2.303	654	6.068	1.3e-09	2.62e-05	TRUE	-0.42
Adrenal_Gland	PI16	6	rs262933	6.87	rs262928	-3.25	6.1695	526	-6.17	6.85e-10	1.21e-05	TRUE	0.11
Stomach	PACSIN1	6	rs2744961	7.51	rs3798544	3.27	6.5385	341	6.54	6.22e-11	1.11e-06	TRUE	0.23
Testis	PPARD	6	rs9469917	7.17	rs4646925	-3.65	4.8933	439	-4.89333	9.91e-07	0.0273209	TRUE	-0.01
Vagina	RAB44	6	rs262933	6.87	rs262902	-2.46	4.95	546	-4.95	7.42e-07	0.0129301	TRUE	-0.02
Adipose_Visceral_Omentum	FOXP4-AS1	6	rs913074	15.38	rs2395779	-4.07	14.3833	505	-14.3833	6.58e-47	1.27e-42	TRUE	-0.62
Adrenal_Gland	RP3-337H4.8	6	rs4711748	6.8	rs833065	2.93	4.7945	430	4.79	1.63e-06	0.0288021	TRUE	0.03
Brain_Amygdala	OARD1	6	rs913074	15.38	rs2104506	-3.14	15.0328	560	-15.0328	4.48e-51	7.43e-47	TRUE	-0.17
Brain_Cerebellum	USP49	6	rs913074	15.38	rs728825	-3.55	-0.92982	474	-4.79493	1.63e-06	0.0322284	TRUE	-0.22
Brain_Spinal_cord_cervical_c-1	TTBK1	6	rs4711748	6.8	rs4711748	-3.36	6.8	362	-6.8	1.05e-11	1.81e-07	TRUE	-0.05
Breast_Mammary_Tissue	LRRC73	6	rs4711748	6.8	rs4714674	2.76	3.8305	427	6.88061	5.96e-12	1.17e-07	TRUE	0.02
Cells_EBV-transformed_lymphocytes	FOXP4-AS1	6	rs913074	15.38	rs722442	3.33	-1.13559	496	-6.83443	8.23e-12	1.3e-07	TRUE	-0.38
Cells_EBV-transformed_lymphocytes	BYSL	6	rs913074	15.38	rs11751924	3.26	-0.54455	463	5.74866	9e-09	0.00014265	TRUE	0.24
Cells_EBV-transformed_lymphocytes	ZNF318	6	rs4711748	6.8	rs2185631	-2.89	-1.8	397	4.96486	6.88e-07	0.0109048	TRUE	0.01
Colon_Transverse	TREM2	6	rs913074	15.38	rs687897	2.99	1.12069	558	10.0881	6.24e-24	1.2e-19	TRUE	0.64
Colon_Transverse	FOXP4	6	rs913074	15.38	rs4714484	-3.24	10.3649	505	-9.34933	8.82e-21	1.7e-16	TRUE	-0.5
Colon_Transverse	RP11-298J23.10	6	rs913074	15.38	rs10223516	-3.59	7.25316	502	-7.25316	4.07e-13	7.83e-09	TRUE	-0.1
Liver	RP11-480N24.4	6	rs4711748	6.8	rs945128	-2.8	5.3571	390	-5.35754	8.44e-08	0.00134432	TRUE	-0.11
Lung	MRPS18A	6	rs4711748	6.8	rs7749629	-2.68	-6.01754	449	6.02	1.77e-09	3.67e-05	TRUE	0.07
Skin_Not_Sun_Exposed_Suprapubic	POLH	6	rs4711748	6.8	rs3025000	-3.71	-2.3443	434	4.77592	1.79e-06	0.0365267	TRUE	0.06
Skin_Sun_Exposed_Lower_leg	CUL9	6	rs2273709	4.61	rs17209372	-4.51	3.6444	364	-4.85563	1.2e-06	0.0250008	TRUE	0.04
Whole_Blood	POLH	6	rs4711748	6.8	rs2273709	3.53	4.6087	435	4.89151	1e-06	0.016263	TRUE	0.01
Heart_Atrial_Appendage	RP3-483K16.4	6	rs10948750	-5.64	rs10948750	2.56	-5.64286	565	-5.64286	1.67e-08	0.000300316	TRUE	0.24
Small_Intestine_Terminal_Ileum	ICK	6	rs10948750	-5.64	rs6922172	3.7	-5.4096	511	-5.40964	6.32e-08	0.00115827	TRUE	0.33
Esophagus_Muscularis	FAM135A	6	rs3909058	-4.81	rs3909058	3.17	-4.80702	473	-4.76491	1.89e-06	0.0361935	TRUE	0
Nerve_Tibial	RP3-331H24.6	6	rs16880821	5.26	rs16880821	3.67	5.26316	463	5.26316	1.42e-07	0.00302105	TRUE	0.52
Brain_Amygdala	AC110781.3	7	rs2280550	6.26	rs2280552	3.67	-4.7797	340	-5.3877	7.14e-08	0.00118488	TRUE	-0.39
Brain_Anterior_cingulate_cortex_BA24	AC110781.3	7	rs2280550	6.26	rs13234909	3.73	-4.8448	352	-4.84	1.27e-06	0.0217843	TRUE	-0.64
Breast_Mammary_Tissue	MAD1L1	7	rs2280550	6.26	rs1464541	3.6	-5.22414	415	-5.22414	1.75e-07	0.0034335	TRUE	-0.74
Nerve_Tibial	AC147651.1	7	rs10950881	4.76	rs7808288	2.25	4.75	253	4.75	2.03e-06	0.0431882	TRUE	0.08
Lung	GPR37	7	rs1383749	-3.98	rs17832827	7.58	-3.5797	364	-4.87196	1.1e-06	0.022803	TRUE	0.56
Brain_Putamen_basal_ganglia	ATP6V0A4	7	rs3807155	-5.17	rs11976614	-3.56	-5.0508	411	5.05	4.4e-07	0.00755524	TRUE	-0.61
Cells_Cultured_fibroblasts	RP11-365F18.6	7	rs9690885	4.88	rs9690885	-2.35	4.8784	405	-4.88	1.07e-06	0.019306	TRUE	-0.05
Heart_Left_Ventricle	RP11-383F6.1	7	rs1673214	-4.84	rs963280	-2.64	-4.7586	416	4.75862	1.95e-06	0.0317129	TRUE	-0.34
Adrenal_Gland	HOXA2	7	rs6956484	-15.11	rs17437810	-3.29	2.96721	415	-5.4027	6.56e-08	0.00115915	TRUE	0.07
Artery_Aorta	MACC1	7	rs10239311	7.29	rs717861	2.65	6.0357	542	6.03571	1.58e-09	2.98e-05	TRUE	-0.03
Brain_Anterior_cingulate_cortex_BA24	JAZF1-AS1	7	rs10486567	-21.65	rs10276381	-7.24	-3.7955	555	4.86	1.2e-06	0.0205836	TRUE	-0.08
Brain_Hypothalamus	EIF4HP1	7	rs10486567	-21.65	rs6461992	-2.93	-6.71028	446	4.80531	1.55e-06	0.0269669	TRUE	0.04
Brain_Nucleus_accumbens_basal_ganglia	RPL23P8	7	rs12155172	13.25	rs2709743	3	9.1897	581	7.65	1.96e-14	3.56e-10	TRUE	0.01
Brain_Putamen_basal_ganglia	SKAP2	7	rs12668786	-11.61	rs12534899	-3.21	-4.5538	502	6.43	1.29e-10	2.22e-06	TRUE	-0.05
Cells_EBV-transformed_lymphocytes	RPL21P75	7	rs10239311	7.29	rs6980327	-2.88	-1.8103	523	5.9632	2.47e-09	3.91e-05	TRUE	0.01
Colon_Transverse	TAX1BP1	7	rs10486567	-21.65	rs6961429	-2.37	-15.1754	481	15.1754	5.14e-52	9.88e-48	TRUE	-0.34
Colon_Transverse	HIBADH	7	rs10486567	-21.65	rs42115	6.46	-5.4727	487	-5.47273	4.43e-08	0.000851756	TRUE	0.55
Esophagus_Mucosa	CREB5	7	rs10486567	-21.65	rs10486567	-3.97	-21.6461	589	14.9814	9.71e-51	1.87e-46	TRUE	-0.72
Heart_Atrial_Appendage	SP4	7	rs12155172	13.25	rs4721959	4.68	-5.9123	675	-5.91228	3.37e-09	6.06e-05	TRUE	0.08
Heart_Left_Ventricle	ITGB8	7	rs10244534	9.14	rs7780859	2.35	-5.9667	526	-5.96667	2.42e-09	3.94e-05	TRUE	0.02
Kidney_Cortex	SNX10	7	rs4722551	5.08	rs6973874	-2.69	-2.322	503	4.9775	6.44e-07	0.0103806	TRUE	-0.03
Nerve_Tibial	HOTAIRM1	7	rs6956484	-15.11	rs706017	12.38	3.36	420	5.40025	6.65e-08	0.00141479	TRUE	-0.06
Ovary	SKAP2	7	rs12668786	-11.61	rs11772673	3.12	-3.4828	502	-5.64	1.66e-08	0.000296094	TRUE	0.02
Ovary	HOTAIRM1	7	rs6956484	-15.11	rs11772673	3.07	-3.4828	420	-5.4	6.69e-08	0.0011933	TRUE	0.05
Pituitary	HOXA4	7	rs6956484	-15.11	rs12670250	-4.15	-13.9688	393	14	2.42e-44	4.88e-40	TRUE	-0.3
Pituitary	SKAP2	7	rs12668786	-11.61	rs213535	-3.1	0.879	502	5.44	5.42e-08	0.00109305	TRUE	-0.06
Skin_Sun_Exposed_Lower_leg	CDCA7L	7	rs10281087	5.68	rs10241767	9.56	-4.8182	745	-5.05	4.49e-07	0.00935447	TRUE	0.07
Testis	AC073150.6	7	rs10486567	-21.65	rs940525	7.27	12.5091	453	12.5261	5.38e-36	1.48e-31	TRUE	-0.38
Thyroid	TAX1BP1	7	rs10486567	-21.65	rs940526	4.9	12.6	481	12.6	2.11e-36	4.53e-32	TRUE	-0.44
Vagina	EIF4HP1	7	rs10486567	-21.65	rs6957723	2.4	-11.5	446	-11.5	1.32e-30	2.3e-26	TRUE	0.23
Whole_Blood	AC005682.6	7	rs12535331	4.9	rs1990279	5.36	-4.5333	478	-6.16055	7.25e-10	1.18e-05	TRUE	-0.03
Brain_Anterior_cingulate_cortex_BA24	SEPT7P3	7	rs10224902	-5.43	rs10224902	-2.46	-5.4302	539	5.43	5.63e-08	0.000965714	TRUE	-0.41
Colon_Sigmoid	ANLN	7	rs17170593	-5.47	rs3735398	3.57	-5.2791	611	-5.27907	1.3e-07	0.00241137	TRUE	0.5
Brain_Substantia_nigra	LINC01447	7	rs11763044	8.89	rs7795529	-2.83	5.2333	544	-5.23333	1.66e-07	0.00267492	TRUE	-0.1
Heart_Left_Ventricle	TNS3	7	rs11763044	8.89	rs2941542	3.42	-5	558	-5	5.73e-07	0.0093187	TRUE	0.15
Kidney_Cortex	GRB10	7	rs1978208	5.3	rs2715104	3.07	1.8198	528	5.07537	3.87e-07	0.00623805	TRUE	0.01
Ovary	AC069282.6	7	rs1533086	-8.58	rs3801081	-2.43	-8.5333	516	8.53	1.42e-17	2.53e-13	TRUE	0.03
Brain_Hippocampus	PMS2P2	7	rs1167790	-3.07	rs17207196	-3.73	1.5	159	-4.68269	2.83e-06	0.0479289	TRUE	0.06
Brain_Anterior_cingulate_cortex_BA24	GATAD1	7	rs6970613	-5.25	rs10255859	-2.98	-5.1562	307	5.16	2.52e-07	0.00432256	TRUE	-0.13
Skin_Not_Sun_Exposed_Suprapubic	AC002454.1	7	rs6970613	-5.25	rs6970613	2.75	-5.2475	325	-5.24752	1.54e-07	0.00314252	TRUE	0.38
Brain_Anterior_cingulate_cortex_BA24	ASNS	7	rs6965016	17.78	rs17252716	-2.69	2.177	363	9.99	1.65e-23	2.83e-19	TRUE	0.47
Brain_Putamen_basal_ganglia	TECPR1	7	rs6965016	17.78	rs6969321	-4.06	6.1613	350	-6.16	7.22e-10	1.24e-05	TRUE	-0.71
Brain_Substantia_nigra	TMEM130	7	rs3801254	-10.7	rs1688605	-2.11	6.2738	316	-6.27381	3.52e-10	5.67e-06	TRUE	0.02
Cells_EBV-transformed_lymphocytes	TAC1	7	rs6965016	17.78	rs1420172	-2.55	0.5536	366	-8.2385	1.74e-16	2.76e-12	TRUE	-0.44
Esophagus_Gastroesophageal_Junction	TECPR1	7	rs6965016	17.78	rs2291745	3.8	8.3385	350	8.33846	7.53e-17	1.38e-12	TRUE	0.37
Heart_Atrial_Appendage	LMTK2	7	rs6965016	17.78	rs7777145	4.42	5.9891	346	5.98913	2.11e-09	3.79e-05	TRUE	0.17
Muscle_Skeletal	ASNS	7	rs6965016	17.78	rs17595064	7.86	-2.73611	364	-5.48052	4.24e-08	0.000732587	TRUE	-0.17
Brain_Spinal_cord_cervical_c-1	ST7	7	rs12706145	-5.67	rs12706145	2.24	-5.6727	333	-5.67273	1.41e-08	0.000243366	TRUE	0.71
Heart_Atrial_Appendage	PRAG1	8	rs7813381	6.72	rs7464820	2.87	6.3333	438	6.33333	2.4e-10	4.32e-06	TRUE	0.48
Brain_Hippocampus	FAM83H	8	rs7831467	-4.08	rs28548729	4.23	-2.5072	313	-4.7028	2.57e-06	0.0435255	TRUE	0.72
Adipose_Subcutaneous	R3HCC1	8	rs1160267	24.69	rs2294126	3.8	4.59659	629	5.35655	8.48e-08	0.00170524	TRUE	0.04
Adipose_Visceral_Omentum	SLC25A37	8	rs1160267	24.69	rs2942219	4.13	-10.8548	579	-8.43	3.38e-17	6.54e-13	TRUE	-0.25
Adrenal_Gland	RP11-582J16.5	8	rs2241260	-6.27	rs2241261	2.63	-5.8929	519	-5.89	3.8e-09	6.71e-05	TRUE	-0.03
Artery_Coronary	RP11-177H13.2	8	rs1160267	24.69	rs2928672	3.76	-6.6786	621	-6.67857	2.41e-11	4.25e-07	TRUE	-0.19
Artery_Tibial	CHMP7	8	rs1160267	24.69	rs4242396	-6.45	6.41096	621	-6.98243	2.9e-12	5.51e-08	TRUE	-0.01
Artery_Tibial	TNFRSF10A	8	rs1160267	24.69	rs4242396	-5.39	6.41096	621	-4.84662	1.26e-06	0.023945	TRUE	-0.02
Brain_Anterior_cingulate_cortex_BA24	TNFRSF10A	8	rs1160267	24.69	rs2457436	-2.79	2.082	621	-5.25852	1.45e-07	0.00248718	TRUE	-0.01
Brain_Caudate_basal_ganglia	LOXL2	8	rs1160267	24.69	rs17089243	3.52	1.6496	599	6.87951	6.01e-12	1.09e-07	TRUE	0.12
Brain_Caudate_basal_ganglia	SLC25A37	8	rs1160267	24.69	rs6998928	3.61	3.1379	579	6.36316	1.98e-10	3.58e-06	TRUE	0.21
Brain_Caudate_basal_ganglia	RP11-1149O23.3	8	rs1160267	24.69	rs1810195	-3.14	4.8384	622	-5.88964	3.87e-09	7e-05	TRUE	-0.15
Brain_Cerebellum	PNOC	8	rs757	4.75	rs757	-5.47	4.7544	521	-4.75439	1.99e-06	0.0393463	TRUE	-0.02
Brain_Cortex	STC1	8	rs1160267	24.69	rs10503733	2.6	15.8095	496	6.93101	4.18e-12	7.76e-08	TRUE	0.27
Breast_Mammary_Tissue	NKX3-1	8	rs1160267	24.69	rs2137304	-2.95	2.2473	553	-13.6245	2.86e-42	5.61e-38	TRUE	-0.44
Colon_Sigmoid	LOXL2	8	rs1160267	24.69	rs11992321	-3.66	-4.6125	599	6.48564	8.84e-11	1.64e-06	TRUE	0.17
Colon_Sigmoid	RP11-1149O23.3	8	rs1160267	24.69	rs11986963	-3.68	-2.243	622	5.02391	5.06e-07	0.00938579	TRUE	0.21
Colon_Transverse	NKX3-1	8	rs1160267	24.69	rs4512387	2.99	3.3692	548	6.93089	4.18e-12	8.04e-08	TRUE	0.18
Heart_Left_Ventricle	TNFRSF10A	8	rs1160267	24.69	rs4242394	4.47	-2.125	621	-5.86142	4.59e-09	7.46e-05	TRUE	0.01
Lung	RP11-875O11.1	8	rs12544414	6.89	rs12544038	-4.1	4.59649	584	-6.66008	2.74e-11	5.68e-07	TRUE	-0.06
Minor_Salivary_Gland	NKX2-6	8	rs1160267	24.69	rs7813472	-5.97	6.5574	531	-6.5477	5.84e-11	1.03e-06	TRUE	0.14
Pituitary	R3HCC1	8	rs1160267	24.69	rs11776949	3.17	5.97059	629	6.0629	1.34e-09	2.7e-05	TRUE	0.09
Skin_Sun_Exposed_Lower_leg	TNFRSF10A	8	rs1160267	24.69	rs12544414	-4.7	6.8861	621	-6.89	5.72e-12	1.19e-07	TRUE	-0.04
Testis	EBF2	8	rs11135910	7.84	rs10104004	-4.03	5.9103	558	-6.01	1.89e-09	5.21e-05	TRUE	0
Vagina	NKX3-1	8	rs1160267	24.69	rs4872175	-3.65	24.3571	547	-24.3571	4.87e-131	8.49e-127	TRUE	-0.36
Whole_Blood	RP11-875O11.1	8	rs12544414	6.89	rs2241261	5.94	-5.89286	584	-5.89286	3.8e-09	6.18e-05	TRUE	0.01
Cells_Cultured_fibroblasts	TACC1	8	rs6474499	4.77	rs7016882	6.39	-3.9298	325	-4.97333	6.58e-07	0.0118723	TRUE	-0.45
Prostate	SEPT10P1	8	rs13262826	-4.98	rs7829576	3.2	4.7368	405	4.73684	2.17e-06	0.0413819	TRUE	-0.16
Brain_Frontal_Cortex_BA9	AC022182.3	8	rs876957	-5.78	rs1386220	-2.33	-2.125	418	6.09	1.1e-09	1.95e-05	TRUE	-0.51
Testis	RP11-91I20.1	8	rs876957	-5.78	rs11990117	2.44	-5.4839	415	-5.48	4.16e-08	0.00114687	TRUE	0.72
Stomach	TRAM1	8	rs16937156	-6.12	rs17686100	3.75	-6.1111	281	-6.11111	9.89e-10	1.77e-05	TRUE	0.52
Vagina	SLCO5A1	8	rs16936812	-5.44	rs3892265	-2.89	-5.1875	433	5.1875	2.13e-07	0.00371174	TRUE	-0.15
Adipose_Subcutaneous	HEY1	8	rs4740130	-6.22	rs10108224	-2.44	-5.68254	383	5.68254	1.33e-08	0.00026745	TRUE	-0.36
Adipose_Visceral_Omentum	CHMP4C	8	rs11782652	4.74	rs11782652	-8.52	4.7364	344	-4.74	2.18e-06	0.0421874	TRUE	-0.01
Brain_Anterior_cingulate_cortex_BA24	CHMP4C	8	rs11782652	4.74	rs11782652	-4.25	4.7364	339	-4.73636	2.18e-06	0.0373935	TRUE	-0.05
Brain_Nucleus_accumbens_basal_ganglia	RP11-48B3.4	8	rs4740130	-6.22	rs4740135	3.04	-6.2154	359	-6.21538	5.12e-10	9.3e-06	TRUE	0.6
Brain_Spinal_cord_cervical_c-1	CHMP4C	8	rs11782652	4.74	rs11782652	-4.26	4.7364	338	-5.13974	2.75e-07	0.0047465	TRUE	-0.04
Breast_Mammary_Tissue	RP11-363E6.4	8	rs11782652	4.74	rs11782652	2.82	4.7364	404	4.7364	2.18e-06	0.0427716	TRUE	0.07
Colon_Sigmoid	CHMP4C	8	rs11782652	4.74	rs11782652	-5.06	4.7364	343	-4.73636	2.18e-06	0.0404368	TRUE	-0.04
Kidney_Cortex	CHMP4C	8	rs11782652	4.74	rs11782652	-4.22	4.7364	342	-4.73636	2.18e-06	0.0351394	TRUE	0.03
Spleen	CHMP4C	8	rs11782652	4.74	rs11782652	-5.98	4.7364	343	-4.74	2.18e-06	0.0417405	TRUE	-0.03
Thyroid	FABP5	8	rs11782652	4.74	rs11782652	2.71	4.73636	407	4.73636	2.18e-06	0.0468133	TRUE	-0.01
Uterus	CHMP4C	8	rs11782652	4.74	rs11782652	-2.04	4.7364	343	-4.73636	2.18e-06	0.037108	TRUE	0.08
Brain_Frontal_Cortex_BA9	RSPO2	8	rs6469163	-7.97	rs1031402	3.87	-7.0635	381	-7.06	1.62e-12	2.88e-08	TRUE	0.69
Brain_Spinal_cord_cervical_c-1	ANGPT1	8	rs4735022	-7.16	rs4734166	3.37	-6.8125	459	-6.53721	6.27e-11	1.08e-06	TRUE	0.05
Adipose_Subcutaneous	PCAT1	8	rs1016343	33.09	rs2392683	-3.01	11.5862	535	-11.5862	4.84e-31	9.73e-27	TRUE	0.01
Adipose_Visceral_Omentum	PCAT1	8	rs1016343	33.09	rs16901898	3.94	-21.8852	535	-21.9	3.59e-106	6.95e-102	TRUE	0.02
Adipose_Visceral_Omentum	TMEM75	8	rs7814837	43.11	rs10217106	2.8	-4.8293	591	-4.83	1.37e-06	0.0265122	TRUE	-0.19
Adrenal_Gland	POU5F1B	8	rs7814837	43.11	rs13252298	3.11	-19.7377	519	-19.7	1.02e-86	1.8e-82	TRUE	-0.05
Artery_Coronary	PVT1	8	rs7814837	43.11	rs7819102	3.13	-19.0909	619	-19.0909	3e-81	5.29e-77	TRUE	-0.31
Brain_Caudate_basal_ganglia	MYC	8	rs7814837	43.11	rs17467139	-3.24	20.1062	622	-10.3312	5.09e-25	9.2e-21	TRUE	-0.06
Brain_Cerebellar_Hemisphere	PVT1	8	rs7814837	43.11	rs16902734	3.41	1.6716	618	9.86922	5.66e-23	1.07e-18	TRUE	0.17
Brain_Cortex	PVT1	8	rs7814837	43.11	rs11988519	3.38	3.6667	619	6.5923	4.33e-11	8.04e-07	TRUE	0.04
Brain_Frontal_Cortex_BA9	PVT1	8	rs7814837	43.11	rs4733595	4.11	3.4912	619	9.36	7.81e-21	1.39e-16	TRUE	0.13
Brain_Hippocampus	PVT1	8	rs7814837	43.11	rs4871026	3.14	-5.037	618	-5.037	4.73e-07	0.00801073	TRUE	-0.09
Cells_Cultured_fibroblasts	POU5F1B	8	rs7814837	43.11	rs12543549	-3.38	-1.7097	520	32.4087	2.07e-230	3.73e-226	TRUE	0.48
Cells_Cultured_fibroblasts	CASC8	8	rs7814837	43.11	rs10217106	-3.11	-4.8293	528	4.82927	1.37e-06	0.0247189	TRUE	0
Cells_EBV-transformed_lymphocytes	CASC11	8	rs7814837	43.11	rs10090421	3.15	21.2381	624	21.2	4.25e-100	6.74e-96	TRUE	0
Colon_Transverse	POU5F1B	8	rs7814837	43.11	rs3847137	-4.74	30.4727	519	-31.1878	1.56e-213	3e-209	TRUE	-0.05
Esophagus_Mucosa	TMEM75	8	rs7814837	43.11	rs3999771	-2.42	6.3485	591	-6.34848	2.17e-10	4.19e-06	TRUE	0.28
Esophagus_Mucosa	CASC19	8	rs7814837	43.11	rs2466030	7.84	4.8333	570	6.282	3.34e-10	6.44e-06	TRUE	0.03
Kidney_Cortex	PCAT1	8	rs1016343	33.09	rs11777807	2.72	-5.8036	534	-9.68907	3.36e-22	5.42e-18	TRUE	-0.06
Nerve_Tibial	PCAT1	8	rs1016343	33.09	rs11988135	2.71	4.722	535	4.72202	2.34e-06	0.0497835	TRUE	0.03
Ovary	PVT1	8	rs7814837	43.11	rs2648882	4.11	0.6375	618	6.3436	2.25e-10	4.01e-06	TRUE	0
Pancreas	POU5F1B	8	rs7814837	43.11	rs10956365	-3.56	9.7536	519	-9.75362	1.78e-22	3.08e-18	TRUE	-0.01
Pituitary	PCAT1	8	rs1016343	33.09	rs2893579	3.39	-8.93443	532	-8.93443	4.09e-19	8.25e-15	TRUE	0.01
Pituitary	PVT1	8	rs7814837	43.11	rs6995630	3.55	2.01613	619	7.53738	4.8e-14	9.68e-10	TRUE	0.16
Skin_Not_Sun_Exposed_Suprapubic	CASC21	8	rs7814837	43.11	rs10217106	3.25	-4.82927	557	-9.07808	1.11e-19	2.27e-15	TRUE	-0.19
Skin_Sun_Exposed_Lower_leg	RP11-89K10.1	8	rs9297750	-22.69	rs753228	3.18	-8.6503	493	-6.27	3.69e-10	7.69e-06	TRUE	0.01
Uterus	POU5F1B	8	rs7814837	43.11	rs16902124	2.77	7.4667	515	7.46667	8.23e-14	1.4e-09	TRUE	0.3
Vagina	PCAT1	8	rs1016343	33.09	rs975788	-3.28	-5.57333	531	5.57333	2.5e-08	0.00043565	TRUE	0.03
Whole_Blood	CASC8	8	rs7814837	43.11	rs9297756	13.47	17.7432	528	18.1771	7.84e-74	1.28e-69	TRUE	0.04
Artery_Tibial	SAXO1	9	rs10123400	8.125	rs4392990	-3.76	7.8246	624	-7.82456	5.09e-15	9.67e-11	TRUE	-0.75
Esophagus_Mucosa	CDKN2B	9	rs1011970	6.875	rs2069426	-3.91	6.32292	437	-6.18954	6.03e-10	1.16e-05	TRUE	-0.07
Heart_Left_Ventricle	CDKN2A	9	rs1011970	6.875	rs2811710	3.2	5.7193	447	5.7193	1.07e-08	0.000174014	TRUE	0
Lung	SAXO1	9	rs10123400	8.125	rs7022613	4.16	-6.1964	625	-6.19643	5.78e-10	1.2e-05	TRUE	-0.61
Muscle_Skeletal	RP11-146N23.1	9	rs10123400	8.12	rs10511667	3.131	5.6163	622	5.61628	1.95e-08	0.000336921	TRUE	-0.16
Nerve_Tibial	RP11-70L8.5	9	rs1011970	6.875	rs10965197	-2.954	4.7931	441	-4.7931	1.64e-06	0.034891	TRUE	-0.02
Skin_Sun_Exposed_Lower_leg	CDKN2B	9	rs1011970	6.875	rs2069422	-4.503	5.4301	437	-5.43011	5.63e-08	0.00117295	TRUE	0
Spleen	CDKN2B	9	rs1011970	6.875	rs2811712	-4.139	5.0449	437	-5.08215	3.73e-07	0.00714183	TRUE	-0.05
Adipose_Subcutaneous	DCAF12	9	rs4817	7.5	rs10971745	2.599	-5.1471	324	-5.14734	2.64e-07	0.00530878	TRUE	-0.45
Artery_Tibial	UBE2R2	9	rs4817	7.5	rs10971712	-4.65	5.7882	303	-5.78824	7.11e-09	0.000135118	TRUE	-0.12
Heart_Atrial_Appendage	AQP7	9	rs7038553	7.482	rs2486675	3.792	7.32143	401	4.70798	2.5e-06	0.0449575	TRUE	0.63
Minor_Salivary_Gland	GNE	9	rs1105783	4.661	rs1105783	-3.301	4.66102	388	-4.75542	1.98e-06	0.0349133	TRUE	-0.05
Pituitary	UBE2R2-AS1	9	rs4817	7.5	rs13302285	2.907	1.2437	303	6.09348	1.1e-09	2.22e-05	TRUE	0.73
Pituitary	RP11-571F15.3	9	rs4817	7.5	rs12377078	1.857	5.1209	322	5.12088	3.04e-07	0.00613077	TRUE	0.41
Prostate	FAM219A	9	rs6476429	7.446	rs307697	-2.711	7.4107	348	-7.4107	1.26e-13	2.4e-09	TRUE	-0.45
Artery_Coronary	TXN	9	rs1049927	-5.012	rs1049927	-3.544	-5.012	646	5.01205	5.39e-07	0.00950257	TRUE	-0.02
Prostate	TXN	9	rs1049927	-5.012	rs1049927	-5.402	-5.012	647	5.1796	2.22e-07	0.00423354	TRUE	0.04
Adipose_Subcutaneous	RP11-123K19.1	9	rs10448285	-4.915	rs3829849	-4.75	-4.7759	471	4.77586	1.79e-06	0.0359951	TRUE	0.06
Adipose_Visceral_Omentum	LMX1B	9	rs10448285	-4.915	rs10448285	-4.139	-4.9153	474	4.91525	8.87e-07	0.0171652	TRUE	-0.05
Brain_Cerebellum	SH2D3C	9	rs6478788	7	rs913990	-2.11	4.8333	380	-4.83333	1.34e-06	0.0264945	TRUE	-0.03
Brain_Frontal_Cortex_BA9	TOR1A	9	rs1043186	7.288	rs2296786	-3.383	4.69492	452	-5.07281	3.92e-07	0.00696192	TRUE	-0.69
Brain_Nucleus_accumbens_basal_ganglia	TTC16	9	rs6478788	7	rs4269634	-3.56	6.2545	368	-6.25455	3.99e-10	7.25e-06	TRUE	0.01
Brain_Substantia_nigra	PTRH1	9	rs6478788	7	rs3780652	2.87	4.0517	370	4.9545	7.25e-07	0.0116826	TRUE	0.02
Breast_Mammary_Tissue	USP20	9	rs1043186	7.288	rs2274507	4.131	6.2029	453	6.2029	5.54e-10	1.09e-05	TRUE	0.76
Colon_Sigmoid	TOR1A	9	rs1043186	7.288	rs2296786	-5.388	4.6949	460	-4.69492	2.67e-06	0.0495258	TRUE	-0.34
Pancreas	TOR1A	9	rs1043186	7.288	rs7025992	-5.646	5.6271	458	-5.62712	1.83e-08	0.00031659	TRUE	-0.63
Prostate	STXBP1	9	rs6478788	7	rs6478788	3.423	7	358	7	2.56e-12	4.88e-08	TRUE	-0.02
Stomach	RP13-225O21.2	9	rs6478788	7	rs6478788	-2.369	7	339	-7	2.56e-12	4.58e-08	TRUE	-0.02
Vagina	LRSAM1	9	rs6478788	7	rs514024	-2.672	4.7368	362	-4.73684	2.17e-06	0.0378144	TRUE	-0.02
Whole_Blood	CDK9	9	rs6478788	7	rs522328	-3.417	5.08929	379	-5.0893	3.59e-07	0.00583842	TRUE	-0.05

## Sheet: Table S4
Table S4. MAGMA gene-based test identified 742 significant genes associated with prostate cancer
Gene symbol	Ensemeble ID	CHR	START	STOP	NSNPS	NPARAM	N	ZSTAT	P	P.bonferroni
JAZF1	ENSG00000153814	7	27870192	28220362	1953	166	72726828	10.958	3.05e-28	5.89e-24
TNS3	ENSG00000136205	7	47314752	47622156	1661	193	72726828	9.952	1.24e-23	2.38e-19
SIDT1	ENSG00000072858	3	113251143	113348425	571	75	72726828	9.8	5.63e-23	1.09e-18
MLPH	ENSG00000115648	2	238394071	238463961	692	63	72726828	9.6641	2.14e-22	4.13e-18
SLC22A2	ENSG00000112499	6	160592093	160698670	635	70	72726828	9.6395	2.72e-22	5.25e-18
HNF1B	ENSG00000108753	17	36046435	36105237	336	96	72726828	9.6447	2.59e-22	4.99e-18
TUBA1C	ENSG00000167553	12	49582519	49667114	402	90	72726828	9.6137	3.5e-22	6.75e-18
WDPCP	ENSG00000143951	2	63348518	64054977	3135	84	72726828	9.3336	5.11e-21	9.86e-17
FBRSL1	ENSG00000112787	12	133066137	133161774	782	66	72726828	9.0582	6.63e-20	1.28e-15
COL23A1	ENSG00000050767	5	177664619	178017556	2617	218	72726828	9.033	8.35e-20	1.61e-15
THADA	ENSG00000115970	2	43393800	43823185	2363	96	72726828	8.9423	1.91e-19	3.67e-15
RAD51B	ENSG00000182185	14	68286496	69196935	4637	221	72726828	8.7367	1.2e-18	2.31e-14
MYEOV	ENSG00000172927	11	69061605	69182494	352	59	72726828	8.7259	1.32e-18	2.55e-14
SLC22A3	ENSG00000146477	6	160769300	160876014	588	62	72726828	8.7093	1.53e-18	2.95e-14
PDLIM5	ENSG00000163110	4	95373037	95589377	1118	69	72726828	8.6939	1.75e-18	3.38e-14
EHBP1	ENSG00000115504	2	62900986	63273622	1167	123	72726828	8.6176	3.42e-18	6.59e-14
NOL10	ENSG00000115761	2	10710892	10830101	818	47	72726828	8.5575	5.77e-18	1.11e-13
SOD2	ENSG00000112096	6	160090089	160183561	616	57	72726828	8.5164	8.23e-18	1.59e-13
FARP2	ENSG00000006607	2	242295658	242434256	844	63	72726828	8.4851	1.08e-17	2.08e-13
EEFSEC	ENSG00000132394	3	127872297	128127485	1078	59	72726828	8.4347	1.66e-17	3.2e-13
BOC	ENSG00000144857	3	112929850	113006303	423	70	72726828	8.3853	2.53e-17	4.88e-13
KRT8	ENSG00000170421	12	53290977	53343738	306	53	72726828	8.378	2.69e-17	5.19e-13
TNXB	ENSG00000168477	6	32008931	32083111	394	73	72726828	8.3421	3.65e-17	7.03e-13
RGS17	ENSG00000091844	6	153325594	153452384	700	56	72726828	8.3343	3.9e-17	7.52e-13
ITGA6	ENSG00000091409	2	173292082	173371181	545	55	72726828	8.3003	5.19e-17	1e-12
NEDD9	ENSG00000111859	6	11183531	11382581	1208	185	72726828	8.2994	5.23e-17	1.01e-12
USP39	ENSG00000168883	2	85829979	85876403	200	69	72726828	8.2856	5.87e-17	1.13e-12
ANO7	ENSG00000146205	2	242127924	242164792	286	69	72726828	8.2617	7.18e-17	1.38e-12
NKX3-1	ENSG00000167034	8	23536206	23540440	16	9	72726828	8.2617	7.18e-17	1.38e-12
FERMT2	ENSG00000073712	14	53323986	53419153	503	51	72726828	8.2388	8.7e-17	1.68e-12
TTLL1	ENSG00000100271	22	43435522	43485434	337	52	72726828	8.2351	8.97e-17	1.73e-12
STMN3	ENSG00000197457	20	62271061	62284780	90	27	72726828	8.1926	1.28e-16	2.46e-12
MCL1	ENSG00000143384	1	150547032	150552066	16	10	72726828	8.1426	1.93e-16	3.73e-12
PPA2	ENSG00000138777	4	106290234	106395238	709	47	72726828	8.1479	1.85e-16	3.57e-12
GPSM3	ENSG00000213654	6	32158543	32163300	20	11	72726828	8.1423	1.94e-16	3.74e-12
PRRT1	ENSG00000204314	6	32116136	32122150	16	9	72726828	8.1198	2.34e-16	4.5e-12
BAIAP2L1	ENSG00000006453	7	97920963	98030380	540	37	72726828	8.0834	3.15e-16	6.07e-12
MAML3	ENSG00000196782	4	140637907	141075338	2166	240	72726828	8.0538	4.01e-16	7.74e-12
C11orf30	ENSG00000158636	11	76155967	76264069	433	57	72726828	8.0437	4.36e-16	8.4e-12
COL2A1	ENSG00000139219	12	48366748	48398269	216	42	72726828	8.0258	5.05e-16	9.73e-12
TRAPPC1	ENSG00000170043	17	7833663	7835441	10	6	72726828	8.0205	5.26e-16	1.02e-11
RNF181	ENSG00000168894	2	85822848	85824736	9	4	72726828	7.9994	6.25e-16	1.2e-11
POU5F1B	ENSG00000212993	8	128426535	128432311	50	11	72726828	7.9955	6.45e-16	1.24e-11
TMEM150A	ENSG00000168890	2	85825671	85830319	8	4	72726828	7.9766	7.52e-16	1.45e-11
SLC39A1	ENSG00000143570	1	153931575	153940188	34	20	72726828	7.972	7.81e-16	1.51e-11
CCND1	ENSG00000110092	11	69455855	69469242	65	29	72726828	7.9681	8.05e-16	1.55e-11
VPS54	ENSG00000143952	2	64119280	64246206	778	64	72726828	7.9589	8.68e-16	1.67e-11
TNFRSF6B	ENSG00000243509	20	62328021	62330037	24	10	72726828	7.9533	9.08e-16	1.75e-11
OTX1	ENSG00000115507	2	63277192	63284971	21	13	72726828	7.9487	9.43e-16	1.82e-11
RSPO2	ENSG00000147655	8	108911544	109095913	923	84	72726828	7.9466	9.58e-16	1.85e-11
ADAM15	ENSG00000143537	1	155023042	155035252	63	32	72726828	7.9356	1.05e-15	2.02e-11
PRRC2A	ENSG00000204469	6	31588497	31605548	114	37	72726828	7.9389	1.02e-15	1.97e-11
EGFL8	ENSG00000241404	6	32132360	32136058	26	13	72726828	7.9348	1.05e-15	2.03e-11
WDR52	ENSG00000206530	3	113005777	113160457	920	44	72726828	7.9172	1.21e-15	2.34e-11
SIPA1L3	ENSG00000105738	19	38397868	38699012	1654	114	72726828	7.9175	1.21e-15	2.34e-11
PPT2	ENSG00000221988	6	32121218	32134011	71	33	72726828	7.9139	1.25e-15	2.4e-11
SPICE1	ENSG00000163611	3	113161565	113234034	527	36	72726828	7.9001	1.39e-15	2.69e-11
C6orf15	ENSG00000204542	6	31079000	31080336	22	8	72726828	7.9011	1.38e-15	2.66e-11
CCHCR1	ENSG00000204536	6	31110216	31126015	215	34	72726828	7.8983	1.41e-15	2.73e-11
FAM83F	ENSG00000133477	22	40390953	40439533	210	60	72726828	7.9024	1.37e-15	2.64e-11
RP4-583P15.14	ENSG00000273047	20	62369623	62371751	9	4	72726828	7.8856	1.56e-15	3.02e-11
PPT2-EGFL8	ENSG00000258388	6	32121622	32139755	99	43	72726828	7.8831	1.6e-15	3.08e-11
KDSR	ENSG00000119537	18	60994959	61034743	154	33	72726828	7.8674	1.81e-15	3.49e-11
RTEL1-TNFRSF6B	ENSG00000026036	20	62290653	62330037	397	57	72726828	7.869	1.79e-15	3.45e-11
BAG6	ENSG00000204463	6	31606805	31620482	78	31	72726828	7.8634	1.87e-15	3.6e-11
BRI3	ENSG00000164713	7	97881691	97937162	324	34	72726828	7.8616	1.9e-15	3.66e-11
RP11-81K2.1	ENSG00000262039	17	47448102	47554350	610	108	72726828	7.8492	2.09e-15	4.04e-11
PBXIP1	ENSG00000163346	1	154916552	154928599	45	32	72726828	7.8452	2.16e-15	4.17e-11
CSNK2B-LY6G5B-1181	ENSG00000263020	6	31633879	31641323	42	21	72726828	7.8415	2.23e-15	4.29e-11
UGP2	ENSG00000169764	2	64068074	64118696	240	62	72726828	7.8325	2.39e-15	4.61e-11
VPS53	ENSG00000141252	17	411908	624957	1494	75	72726828	7.8326	2.39e-15	4.61e-11
ZNF571	ENSG00000180479	19	38045684	38085673	150	33	72726828	7.8336	2.37e-15	4.57e-11
TPM3	ENSG00000143549	1	154127784	154167124	124	37	72726828	7.8244	2.55e-15	4.92e-11
HLA-A	ENSG00000206503	6	29909037	29913661	271	23	72726828	7.8197	2.65e-15	5.1e-11
HDLBP	ENSG00000115677	2	242166679	242256476	522	60	72726828	7.8126	2.8e-15	5.4e-11
PNLDC1	ENSG00000146453	6	160221298	160241736	136	45	72726828	7.8125	2.8e-15	5.41e-11
ACTR1A	ENSG00000138107	10	104238986	104262482	121	15	72726828	7.8153	2.74e-15	5.29e-11
PPP1R14A	ENSG00000167641	19	38741877	38747231	35	13	72726828	7.8097	2.87e-15	5.53e-11
INS-IGF2	ENSG00000129965	11	2153768	2182439	167	54	72726828	7.8009	3.07e-15	5.93e-11
HOXB13	ENSG00000159184	17	46802125	46806540	15	10	72726828	7.7968	3.17e-15	6.12e-11
MMP7	ENSG00000137673	11	102391239	102401484	59	17	72726828	7.7919	3.3e-15	6.36e-11
RASSF3	ENSG00000153179	12	65004293	65091347	495	49	72726828	7.7931	3.27e-15	6.3e-11
MSH5	ENSG00000204410	6	31707725	31732622	149	53	72726828	7.7853	3.48e-15	6.7e-11
AC051642.1	ENSG00000268085	8	23412287	23420651	62	16	72726828	7.7831	3.54e-15	6.82e-11
AGAP7	ENSG00000204169	10	51464162	51486327	74	21	72726828	7.78	3.63e-15	6.99e-11
TRIM31	ENSG00000204616	6	30070674	30080883	139	40	72726828	7.7768	3.72e-15	7.17e-11
STK25	ENSG00000115694	2	242432089	242449145	107	33	72726828	7.7694	3.94e-15	7.6e-11
GPANK1	ENSG00000204438	6	31629006	31634060	41	19	72726828	7.7688	3.96e-15	7.64e-11
ZNF540	ENSG00000171817	19	38042308	38104998	219	45	72726828	7.743	4.86e-15	9.36e-11
AGPAT1	ENSG00000204310	6	32135989	32145873	35	18	72726828	7.7329	5.26e-15	1.01e-10
MBNL1	ENSG00000152601	3	151961617	152183569	874	84	72726828	7.7305	5.36e-15	1.03e-10
CTB-102L5.4	ENSG00000267748	19	38779791	38795550	104	34	72726828	7.73	5.38e-15	1.04e-10
TRIM40	ENSG00000204614	6	30103885	30116512	221	25	72726828	7.7282	5.45e-15	1.05e-10
ZBTB38	ENSG00000177311	3	141043055	141168634	583	73	72726828	7.7154	6.03e-15	1.16e-10
CEACAM21	ENSG00000007129	19	42055886	42093197	170	33	72726828	7.7143	6.08e-15	1.17e-10
KLK15	ENSG00000174562	19	51328545	51340469	90	35	72726828	7.7003	6.79e-15	1.31e-10
PSORS1C2	ENSG00000204538	6	31105313	31107127	28	15	72726828	7.6908	7.31e-15	1.41e-10
TIMM23	ENSG00000138297	10	51592080	51623365	35	19	72726828	7.6922	7.23e-15	1.39e-10
KCNAB3	ENSG00000170049	17	7825177	7833121	39	19	72726828	7.6937	7.14e-15	1.38e-10
AC037199.1	ENSG00000267880	19	51377552	51378040	5	3	72726828	7.6904	7.33e-15	1.41e-10
BIK	ENSG00000100290	22	43506754	43525718	101	28	72726828	7.6952	7.06e-15	1.36e-10
TMEM180	ENSG00000138111	10	104221149	104236802	89	16	72726828	7.687	7.53e-15	1.45e-10
FOXP4	ENSG00000137166	6	41514164	41570122	294	39	72726828	7.6772	8.13e-15	1.57e-10
YIF1B	ENSG00000167645	19	38795753	38807913	66	25	72726828	7.6732	8.39e-15	1.62e-10
AGER	ENSG00000204305	6	32148745	32152101	24	14	72726828	7.6681	8.73e-15	1.68e-10
TERT	ENSG00000164362	5	1253262	1295184	281	99	72726828	7.66	9.3e-15	1.79e-10
CASP8	ENSG00000064012	2	202098166	202152434	265	45	72726828	7.6537	9.76e-15	1.88e-10
TUBA1A	ENSG00000167552	12	49578579	49583107	16	7	72726828	7.6537	9.77e-15	1.88e-10
DDAH2	ENSG00000213722	6	31694815	31698394	18	10	72726828	7.6424	1.07e-14	2.06e-10
IGF2R	ENSG00000197081	6	160390131	160534539	753	118	72726828	7.6143	1.33e-14	2.56e-10
ANXA9	ENSG00000143412	1	150954493	150968110	67	25	72726828	7.6061	1.41e-14	2.72e-10
CRTC2	ENSG00000160741	1	153920145	153931101	32	17	72726828	7.6054	1.42e-14	2.74e-10
CTSK	ENSG00000143387	1	150768684	150780799	36	21	72726828	7.6019	1.46e-14	2.81e-10
NCOA4	ENSG00000138293	10	51565108	51590734	83	39	72726828	7.6007	1.47e-14	2.84e-10
MDH1	ENSG00000014641	2	63815743	63834331	74	21	72726828	7.5995	1.49e-14	2.87e-10
PDK1	ENSG00000152256	2	173420101	173489823	370	36	72726828	7.5888	1.61e-14	3.11e-10
PHC3	ENSG00000173889	3	169804520	169899537	302	59	72726828	7.5888	1.62e-14	3.11e-10
SLC22A1	ENSG00000175003	6	160542821	160579750	217	69	72726828	7.5906	1.59e-14	3.07e-10
GUCY2D	ENSG00000132518	17	7905912	7923657	83	32	72726828	7.5861	1.65e-14	3.18e-10
SENP1	ENSG00000079387	12	48436681	48500091	341	37	72726828	7.585	1.66e-14	3.21e-10
RNF5	ENSG00000204308	6	32146131	32151930	37	16	72726828	7.5801	1.73e-14	3.33e-10
HLA-B	ENSG00000234745	6	31321649	31324965	196	40	72726828	7.5663	1.92e-14	3.7e-10
C1orf43	ENSG00000143612	1	154179182	154193104	67	26	72726828	7.5464	2.24e-14	4.32e-10
INS	ENSG00000254647	11	2181009	2182571	12	6	72726828	7.5465	2.24e-14	4.31e-10
LRRN2	ENSG00000170382	1	204586298	204654861	420	71	72726828	7.5419	2.32e-14	4.47e-10
SESN1	ENSG00000080546	6	109307640	109416022	438	46	72726828	7.5328	2.48e-14	4.79e-10
VAMP8	ENSG00000118640	2	85788685	85809154	113	24	72726828	7.5167	2.81e-14	5.42e-10
BHLHA15	ENSG00000180535	7	97840739	97842291	10	6	72726828	7.5162	2.82e-14	5.44e-10
LAMC1	ENSG00000135862	1	182992595	183114727	786	31	72726828	7.5106	2.94e-14	5.67e-10
VARS	ENSG00000204394	6	31745295	31763730	69	33	72726828	7.5039	3.1e-14	5.97e-10
PFKM	ENSG00000152556	12	48498922	48540187	249	54	72726828	7.5002	3.19e-14	6.14e-10
TMEM17	ENSG00000186889	2	62727356	62739029	74	20	72726828	7.484	3.6e-14	6.95e-10
TMPRSS2	ENSG00000184012	21	42836478	42903043	529	68	72726828	7.4774	3.79e-14	7.31e-10
GPR160	ENSG00000173890	3	169755717	169803191	200	34	72726828	7.4602	4.32e-14	8.33e-10
HSPA1L	ENSG00000204390	6	31777396	31783437	32	19	72726828	7.4483	4.73e-14	9.12e-10
TUBA1B	ENSG00000123416	12	49521565	49525180	19	7	72726828	7.4339	5.27e-14	1.02e-09
CTD-2528L19.4	ENSG00000267552	19	38180766	38210089	116	30	72726828	7.4293	5.46e-14	1.05e-09
CLPTM1L	ENSG00000049656	5	1317859	1345214	197	48	72726828	7.4279	5.52e-14	1.06e-09
ZNF781	ENSG00000196381	19	38158652	38183223	115	35	72726828	7.4191	5.9e-14	1.14e-09
SFTPB	ENSG00000168878	2	85884437	85895864	49	29	72726828	7.4148	6.09e-14	1.17e-09
POU5F1	ENSG00000204531	6	31132119	31148508	225	38	72726828	7.4133	6.16e-14	1.19e-09
ORAOV1	ENSG00000149716	11	69467844	69490184	114	43	72726828	7.4153	6.07e-14	1.17e-09
PRPH	ENSG00000135406	12	49687035	49692465	24	12	72726828	7.4158	6.05e-14	1.17e-09
DPM1	ENSG00000000419	20	49551404	49575092	88	36	72726828	7.4136	6.15e-14	1.19e-09
RTEL1	ENSG00000258366	20	62289163	62328416	384	56	72726828	7.405	6.56e-14	1.26e-09
FAM63A	ENSG00000143409	1	150969025	150980851	59	26	72726828	7.4027	6.67e-14	1.29e-09
CSNK2B	ENSG00000204435	6	31633013	31638120	27	15	72726828	7.3998	6.82e-14	1.31e-09
TCF19	ENSG00000137310	6	31126319	31134936	73	15	72726828	7.3949	7.08e-14	1.36e-09
UBAP2	ENSG00000137073	9	33921691	34048947	691	47	72726828	7.3861	7.56e-14	1.46e-09
SLC6A18	ENSG00000164363	5	1225470	1246304	194	53	72726828	7.3808	7.87e-14	1.52e-09
C19orf33	ENSG00000167644	19	38794801	38795649	5	2	72726828	7.3771	8.09e-14	1.56e-09
CKS1B	ENSG00000173207	1	154947129	154951725	8	5	72726828	7.372	8.4e-14	1.62e-09
ADNP	ENSG00000101126	20	49505585	49547958	225	53	72726828	7.372	8.41e-14	1.62e-09
HELZ2	ENSG00000130589	20	62189439	62205592	164	50	72726828	7.3136	1.3e-13	2.51e-09
SEC61A1	ENSG00000058262	3	127770484	127790526	79	12	72726828	7.2982	1.46e-13	2.81e-09
H2AFJ	ENSG00000246705	12	14927270	14930936	24	15	72726828	7.2976	1.46e-13	2.82e-09
NUP210L	ENSG00000143552	1	153965161	154127592	556	54	72726828	7.2866	1.59e-13	3.07e-09
C6orf48	ENSG00000204387	6	31802385	31807541	37	22	72726828	7.2671	1.84e-13	3.54e-09
SALL3	ENSG00000256463	18	76740275	76762677	108	38	72726828	7.2606	1.93e-13	3.71e-09
POU1F1	ENSG00000064835	3	87308554	87325737	71	27	72726828	7.2464	2.14e-13	4.13e-09
ZNF607	ENSG00000198182	19	38187264	38210691	100	29	72726828	7.2396	2.25e-13	4.34e-09
ARL3	ENSG00000138175	10	104433488	104474164	156	48	72726828	7.2323	2.38e-13	4.58e-09
UBAP2L	ENSG00000143569	1	154192655	154243986	206	53	72726828	7.2227	2.55e-13	4.91e-09
KLK3	ENSG00000142515	19	51358171	51364020	65	20	72726828	7.2234	2.54e-13	4.89e-09
SKIL	ENSG00000136603	3	170075466	170114623	180	32	72726828	7.2084	2.83e-13	5.46e-09
L3MBTL3	ENSG00000198945	6	130334844	130462594	619	56	72726828	7.2066	2.87e-13	5.53e-09
CYB5D1	ENSG00000182224	17	7761064	7765600	17	11	72726828	7.2061	2.88e-13	5.55e-09
UHRF1BP1	ENSG00000065060	6	34759857	34850915	562	45	72726828	7.2024	2.96e-13	5.7e-09
SLC2A4RG	ENSG00000125520	20	62371214	62374858	31	14	72726828	7.1979	3.06e-13	5.89e-09
JTB	ENSG00000143543	1	153946745	153950164	4	2	72726828	7.1908	3.22e-13	6.21e-09
CHMP7	ENSG00000147457	8	23101150	23119512	125	38	72726828	7.1896	3.25e-13	6.26e-09
VDR	ENSG00000111424	12	48235320	48336831	615	109	72726828	7.1805	3.47e-13	6.69e-09
GATA2	ENSG00000179348	3	128198270	128212028	63	25	72726828	7.1794	3.5e-13	6.75e-09
WTAP	ENSG00000146457	6	160146617	160177351	159	42	72726828	7.1669	3.84e-13	7.4e-09
DPCR1	ENSG00000168631	6	30908749	30921998	71	31	72726828	7.1528	4.25e-13	8.2e-09
GRHL1	ENSG00000134317	2	10085341	10142411	505	43	72726828	7.1324	4.93e-13	9.51e-09
ZNF573	ENSG00000189144	19	38226734	38307940	317	46	72726828	7.1315	4.96e-13	9.57e-09
JADE2	ENSG00000043143	5	133860003	133918918	312	55	72726828	7.1244	5.23e-13	1.01e-08
ALS2CR12	ENSG00000155749	2	202152994	202222121	348	46	72726828	7.1068	5.94e-13	1.15e-08
AC104841.2	ENSG00000268485	2	242167319	242168850	7	4	72726828	7.105	6.02e-13	1.16e-08
ZFP30	ENSG00000120784	19	38104650	38183238	328	51	72726828	7.0941	6.51e-13	1.25e-08
SPINT2	ENSG00000167642	19	38734675	38783254	295	49	72726828	7.0831	7.05e-13	1.36e-08
HCG27	ENSG00000206344	6	31165537	31171745	104	18	72726828	7.0804	7.19e-13	1.39e-08
SNRPC	ENSG00000124562	6	34725183	34741571	113	25	72726828	7.0655	8e-13	1.54e-08
MDM4	ENSG00000198625	1	204485511	204542871	371	46	72726828	7.061	8.26e-13	1.59e-08
DLEU1	ENSG00000176124	13	50656307	51297372	3138	186	72726828	7.0601	8.32e-13	1.6e-08
PAX9	ENSG00000198807	14	37126773	37148920	133	34	72726828	7.0572	8.5e-13	1.64e-08
ACAT2	ENSG00000120437	6	160181360	160200144	116	24	72726828	7.0536	8.71e-13	1.68e-08
WBP1L	ENSG00000166272	10	104503727	104576021	398	59	72726828	7.031	1.03e-12	1.98e-08
MYO9B	ENSG00000099331	19	17186591	17325346	982	121	72726828	7.0269	1.06e-12	2.04e-08
SUFU	ENSG00000107882	10	104263744	104393292	540	35	72726828	7.0236	1.08e-12	2.08e-08
MSMB	ENSG00000138294	10	51549498	51562517	73	19	72726828	7.0161	1.14e-12	2.2e-08
KRT79	ENSG00000185640	12	53215194	53228079	61	27	72726828	7.0112	1.18e-12	2.28e-08
TFAP4	ENSG00000090447	16	4307187	4323076	59	22	72726828	7.0052	1.23e-12	2.38e-08
CATSPERG	ENSG00000099338	19	38826415	38861589	233	43	72726828	7.0048	1.24e-12	2.38e-08
PPL	ENSG00000118898	16	4932508	5010742	639	96	72726828	7.0003	1.28e-12	2.46e-08
ITGB8	ENSG00000105855	7	20370325	20455377	505	36	72726828	6.9943	1.33e-12	2.57e-08
HIBADH	ENSG00000106049	7	27565061	27702614	808	40	72726828	6.9821	1.45e-12	2.8e-08
RNF43	ENSG00000108375	17	56429861	56494956	236	56	72726828	6.978	1.5e-12	2.89e-08
GATAD2B	ENSG00000143614	1	153777201	153895451	478	71	72726828	6.9714	1.57e-12	3.02e-08
SCAND3	ENSG00000232040	6	28539407	28583989	204	51	72726828	6.9723	1.56e-12	3.01e-08
GMEB2	ENSG00000101216	20	62218955	62258394	276	32	72726828	6.972	1.56e-12	3.01e-08
HAAO	ENSG00000162882	2	42994229	43019733	197	28	72726828	6.9668	1.62e-12	3.13e-08
FOXP1	ENSG00000114861	3	71003844	71633140	2916	254	72726828	6.9643	1.65e-12	3.18e-08
ENSA	ENSG00000143420	1	150573327	150602088	131	45	72726828	6.96	1.7e-12	3.28e-08
CTBP2	ENSG00000175029	10	126676421	126849739	1238	147	72726828	6.9599	1.7e-12	3.28e-08
RFX6	ENSG00000185002	6	117198375	117253326	280	32	72726828	6.9577	1.73e-12	3.33e-08
NOTCH4	ENSG00000204301	6	32162620	32191844	226	54	72726828	6.9432	1.92e-12	3.7e-08
HOXB6	ENSG00000108511	17	46671639	46682354	50	24	72726828	6.9365	2.01e-12	3.87e-08
HLA-DRA	ENSG00000204287	6	32407619	32412823	77	14	72726828	6.9237	2.2e-12	4.24e-08
FMN1	ENSG00000248905	15	33057747	33486897	3345	232	72726828	6.9146	2.35e-12	4.52e-08
WBP11	ENSG00000084463	12	14939410	14956474	58	27	72726828	6.903	2.55e-12	4.91e-08
UBN1	ENSG00000118900	16	4896666	4932361	248	51	72726828	6.8796	3e-12	5.79e-08
TOR1A	ENSG00000136827	9	132575223	132586413	57	22	72726828	6.8781	3.03e-12	5.85e-08
NCEH1	ENSG00000144959	3	172348039	172429008	504	97	72726828	6.8769	3.06e-12	5.9e-08
NUCKS1	ENSG00000069275	1	205681947	205719404	197	61	72726828	6.8667	3.29e-12	6.34e-08
VWA7	ENSG00000204396	6	31733367	31745108	67	28	72726828	6.8571	3.51e-12	6.77e-08
IGF2	ENSG00000167244	11	2150342	2170833	122	41	72726828	6.8526	3.63e-12	6.99e-08
HAUS6	ENSG00000147874	9	19053141	19103117	369	34	72726828	6.8351	4.1e-12	7.9e-08
UBE2R2	ENSG00000107341	9	33817565	33920402	522	42	72726828	6.8348	4.11e-12	7.92e-08
SLC38A6	ENSG00000139974	14	61447832	61550451	400	73	72726828	6.8244	4.41e-12	8.51e-08
C2orf68	ENSG00000168887	2	85833777	85839189	21	15	72726828	6.8179	4.62e-12	8.91e-08
HSPA1A	ENSG00000204389	6	31783291	31785723	7	4	72726828	6.8056	5.03e-12	9.7e-08
KCNN3	ENSG00000143603	1	154669931	154842756	904	173	72726828	6.8032	5.12e-12	9.86e-08
PHB	ENSG00000167085	17	47481414	47492246	59	28	72726828	6.801	5.2e-12	1e-07
PRSS3	ENSG00000010438	9	33750515	33799230	246	53	72726828	6.7984	5.29e-12	1.02e-07
NIM1K	ENSG00000177453	5	43192173	43280952	498	100	72726828	6.7941	5.45e-12	1.05e-07
C6orf25	ENSG00000204420	6	31686371	31694491	38	19	72726828	6.7934	5.48e-12	1.06e-07
MPHOSPH6	ENSG00000135698	16	82181403	82203831	292	20	72726828	6.7763	6.16e-12	1.19e-07
TOR1B	ENSG00000136816	9	132565432	132573560	47	17	72726828	6.7628	6.77e-12	1.3e-07
LPA	ENSG00000198670	6	160952515	161087407	691	64	72726828	6.7607	6.87e-12	1.32e-07
TBX1	ENSG00000184058	22	19744226	19771116	187	45	72726828	6.7602	6.89e-12	1.33e-07
TROAP	ENSG00000135451	12	49717019	49725514	45	18	72726828	6.7593	6.93e-12	1.34e-07
LMTK2	ENSG00000164715	7	97736197	97838945	589	57	72726828	6.7514	7.32e-12	1.41e-07
LY6G6C	ENSG00000204421	6	31686425	31689622	20	12	72726828	6.7495	7.42e-12	1.43e-07
TCP1	ENSG00000120438	6	160199530	160210781	54	15	72726828	6.7326	8.33e-12	1.61e-07
PIM1	ENSG00000137193	6	37137979	37143202	28	17	72726828	6.72	9.08e-12	1.75e-07
C6orf106	ENSG00000196821	6	34555065	34664636	609	49	72726828	6.7149	9.41e-12	1.81e-07
TPCN2	ENSG00000162341	11	68816365	68858072	355	33	72726828	6.7132	9.52e-12	1.84e-07
HOXB5	ENSG00000120075	17	46668619	46671323	12	7	72726828	6.6945	1.08e-11	2.09e-07
PIK3C2B	ENSG00000133056	1	204391756	204463852	465	63	72726828	6.6912	1.11e-11	2.13e-07
LY6G5B	ENSG00000240053	6	31637944	31641553	28	14	72726828	6.6898	1.12e-11	2.15e-07
PASK	ENSG00000115687	2	242045514	242089679	382	52	72726828	6.6834	1.17e-11	2.25e-07
PLEKHH2	ENSG00000152527	2	43864412	43995126	840	72	72726828	6.6788	1.2e-11	2.32e-07
RP11-321F6.1	ENSG00000259471	15	66874528	66978132	792	87	72726828	6.676	1.23e-11	2.37e-07
CERS2	ENSG00000143418	1	150933059	150947479	73	26	72726828	6.6746	1.24e-11	2.39e-07
FGF10	ENSG00000070193	5	44303646	44389808	394	42	72726828	6.6742	1.24e-11	2.4e-07
ZNF793	ENSG00000188227	19	37997841	38039664	179	61	72726828	6.6748	1.24e-11	2.39e-07
KCNK6	ENSG00000099337	19	38810484	38819660	56	18	72726828	6.6698	1.28e-11	2.47e-07
TET2	ENSG00000168769	4	106067032	106200973	676	69	72726828	6.6684	1.29e-11	2.49e-07
ZSCAN31	ENSG00000235109	6	28292470	28324048	189	38	72726828	6.667	1.31e-11	2.52e-07
C6orf10	ENSG00000204296	6	32256303	32339684	1063	33	72726828	6.6653	1.32e-11	2.55e-07
TIMM23B	ENSG00000204152	10	51371390	51387768	7	3	72726828	6.6603	1.37e-11	2.63e-07
DPF1	ENSG00000011332	19	38701646	38720354	107	31	72726828	6.6369	1.6e-11	3.09e-07
OR2B2	ENSG00000168131	6	27878963	27880174	8	5	72726828	6.6299	1.68e-11	3.24e-07
PIK3R3	ENSG00000117461	1	46505812	46642160	568	51	72726828	6.6237	1.75e-11	3.38e-07
MAP2K1	ENSG00000169032	15	66679155	66784650	543	46	72726828	6.6201	1.8e-11	3.46e-07
KBTBD12	ENSG00000187715	3	127634075	127706514	334	49	72726828	6.619	1.81e-11	3.49e-07
NEU1	ENSG00000204386	6	31825436	31830683	21	15	72726828	6.6185	1.81e-11	3.5e-07
ZNF652	ENSG00000198740	17	47366568	47439835	328	36	72726828	6.6008	2.04e-11	3.94e-07
TECPR1	ENSG00000205356	7	97843936	97881563	247	53	72726828	6.5907	2.19e-11	4.22e-07
TTLL6	ENSG00000170703	17	46839597	46894576	258	37	72726828	6.5884	2.22e-11	4.29e-07
PEX14	ENSG00000142655	1	10532345	10690815	729	80	72726828	6.5844	2.28e-11	4.4e-07
ZKSCAN4	ENSG00000187626	6	28212401	28227011	70	28	72726828	6.5726	2.47e-11	4.77e-07
MRPL52	ENSG00000172590	14	23299088	23304246	37	15	72726828	6.5641	2.62e-11	5.05e-07
RUVBL1	ENSG00000175792	3	127783621	127872757	382	34	72726828	6.5378	3.12e-11	6.02e-07
KRT18	ENSG00000111057	12	53342655	53346685	13	9	72726828	6.5325	3.23e-11	6.23e-07
RNLS	ENSG00000184719	10	90033621	90344287	1547	92	72726828	6.5311	3.26e-11	6.29e-07
HLA-F	ENSG00000204642	6	29690552	29706305	206	26	72726828	6.5204	3.51e-11	6.76e-07
BSN	ENSG00000164061	3	49591922	49708978	383	58	72726828	6.5111	3.73e-11	7.19e-07
AGAP8	ENSG00000174194	10	51224681	51371321	51	27	72726828	6.5092	3.78e-11	7.28e-07
XXbac-BPG32J3.20	ENSG00000204422	6	31654739	31681849	130	43	72726828	6.5046	3.89e-11	7.51e-07
B3GAT1	ENSG00000109956	11	134248398	134281812	247	40	72726828	6.4935	4.19e-11	8.08e-07
PPP1R13B	ENSG00000088808	14	104200089	104313927	535	38	72726828	6.4898	4.3e-11	8.29e-07
USP28	ENSG00000048028	11	113668596	113746292	335	50	72726828	6.4635	5.12e-11	9.86e-07
HLA-E	ENSG00000204592	6	30457244	30461982	19	12	72726828	6.4497	5.6e-11	1.08e-06
GPR56	ENSG00000205336	16	57644564	57698944	454	96	72726828	6.4441	5.81e-11	1.12e-06
LARP4B	ENSG00000107929	10	855484	977564	581	48	72726828	6.438	6.05e-11	1.17e-06
MTA3	ENSG00000057935	2	42721709	42984087	1215	63	72726828	6.4338	6.22e-11	1.2e-06
ABCB5	ENSG00000004846	7	20654830	20816658	1037	92	72726828	6.3871	8.45e-11	1.63e-06
SNAPC5	ENSG00000174446	15	66782473	66790151	31	17	72726828	6.3841	8.62e-11	1.66e-06
LMBR1L	ENSG00000139636	12	49490919	49504683	49	22	72726828	6.3728	9.28e-11	1.79e-06
TMPRSS5	ENSG00000166682	11	113558272	113577095	96	26	72726828	6.3718	9.34e-11	1.8e-06
RASGRP4	ENSG00000171777	19	38899695	38916945	98	32	72726828	6.3712	9.38e-11	1.81e-06
CDCA7	ENSG00000144354	2	174219548	174233725	99	31	72726828	6.3577	1.02e-10	1.97e-06
HLA-DQB1	ENSG00000179344	6	32627244	32636160	891	24	72726828	6.3577	1.02e-10	1.97e-06
HIST1H1B	ENSG00000184357	6	27834570	27835359	11	7	72726828	6.3541	1.05e-10	2.02e-06
HSF5	ENSG00000176160	17	56497528	56565745	234	54	72726828	6.3463	1.1e-10	2.13e-06
TRIM10	ENSG00000204613	6	30119722	30128711	100	17	72726828	6.3437	1.12e-10	2.16e-06
DDX39B	ENSG00000198563	6	31497996	31510225	115	32	72726828	6.3434	1.12e-10	2.17e-06
CASC5	ENSG00000137812	15	40886218	40956540	299	39	72726828	6.3418	1.14e-10	2.19e-06
ATP6V1G2-DDX39B	ENSG00000254870	6	31497996	31514385	140	37	72726828	6.3408	1.14e-10	2.2e-06
RYR1	ENSG00000196218	19	38924339	39078204	1000	98	72726828	6.3387	1.16e-10	2.23e-06
ZBTB46	ENSG00000130584	20	62375019	62462597	682	48	72726828	6.3346	1.19e-10	2.29e-06
RPP21	ENSG00000241370	6	30312908	30314661	21	10	72726828	6.313	1.37e-10	2.64e-06
LY6G5C	ENSG00000204428	6	31644461	31651817	30	13	72726828	6.3133	1.37e-10	2.63e-06
ASB8	ENSG00000177981	12	48541571	48574996	202	40	72726828	6.3116	1.38e-10	2.66e-06
EHMT2	ENSG00000204371	6	31847536	31865464	90	42	72726828	6.3057	1.43e-10	2.77e-06
ZW10	ENSG00000086827	11	113603909	113644533	197	42	72726828	6.3052	1.44e-10	2.78e-06
ZKSCAN3	ENSG00000189298	6	28317691	28336947	106	28	72726828	6.3002	1.49e-10	2.87e-06
C14orf39	ENSG00000179008	14	60863187	60982261	454	37	72726828	6.2955	1.53e-10	2.95e-06
NEK6	ENSG00000119408	9	127019885	127115586	517	58	72726828	6.2873	1.62e-10	3.11e-06
KDELC2	ENSG00000178202	11	108342832	108369159	111	34	72726828	6.2843	1.65e-10	3.17e-06
ZWILCH	ENSG00000174442	15	66797297	66842115	232	42	72726828	6.2841	1.65e-10	3.18e-06
CHRNB1	ENSG00000170175	17	7348380	7361026	60	17	72726828	6.2817	1.67e-10	3.23e-06
HIST1H2AL	ENSG00000198374	6	27833034	27833606	6	4	72726828	6.2792	1.7e-10	3.28e-06
UBA7	ENSG00000182179	3	49842640	49851379	28	15	72726828	6.277	1.73e-10	3.33e-06
MAST2	ENSG00000086015	1	46252659	46501796	1154	45	72726828	6.2722	1.78e-10	3.43e-06
GEMIN4	ENSG00000179409	17	647654	657239	74	27	72726828	6.2429	2.15e-10	4.14e-06
HOXB3	ENSG00000120093	17	46626232	46682274	246	66	72726828	6.241	2.17e-10	4.19e-06
RPL4	ENSG00000174444	15	66790355	66816870	158	39	72726828	6.2315	2.31e-10	4.45e-06
C17orf47	ENSG00000181013	17	56618948	56621729	12	7	72726828	6.2267	2.38e-10	4.59e-06
PPP1R7	ENSG00000115685	2	242088991	242123067	218	47	72726828	6.2251	2.41e-10	4.64e-06
GPX5	ENSG00000224586	6	28493702	28502729	48	19	72726828	6.2104	2.64e-10	5.1e-06
DIS3L	ENSG00000166938	15	66585555	66626236	205	50	72726828	6.2108	2.64e-10	5.08e-06
DNMT3B	ENSG00000088305	20	31350191	31397162	299	33	72726828	6.2112	2.63e-10	5.07e-06
SMAD2	ENSG00000175387	18	45357922	45457515	455	55	72726828	6.2095	2.66e-10	5.12e-06
WDR87	ENSG00000171804	19	38375463	38397317	83	37	72726828	6.2003	2.82e-10	5.43e-06
HTR3B	ENSG00000149305	11	113775399	113817287	241	54	72726828	6.1995	2.83e-10	5.46e-06
ZNF22	ENSG00000165512	10	45495923	45500774	30	12	72726828	6.1925	2.96e-10	5.71e-06
TRIM26	ENSG00000234127	6	30152232	30181204	296	27	72726828	6.1821	3.16e-10	6.1e-06
PPFIBP2	ENSG00000166387	11	7534529	7678358	1020	113	72726828	6.177	3.27e-10	6.3e-06
MEGT1	ENSG00000250641	6	31674681	31685695	62	26	72726828	6.1718	3.38e-10	6.51e-06
PRRG2	ENSG00000126460	19	50083903	50094272	64	18	72726828	6.1661	3.5e-10	6.75e-06
UQCC1	ENSG00000101019	20	33890369	33999944	427	46	72726828	6.1488	3.9e-10	7.53e-06
MCCD1	ENSG00000204511	6	31496494	31498009	27	10	72726828	6.1392	4.15e-10	8e-06
PARPBP	ENSG00000185480	12	102513956	102591298	349	48	72726828	6.1373	4.2e-10	8.09e-06
GOLPH3L	ENSG00000143457	1	150618701	150669630	238	30	72726828	6.1094	5e-10	9.64e-06
ARNT	ENSG00000143437	1	150782181	150849244	247	56	72726828	6.1151	4.82e-10	9.3e-06
DENND4B	ENSG00000198837	1	153901977	153919172	40	13	72726828	6.1094	5e-10	9.64e-06
CREB3L4	ENSG00000143578	1	153940010	153946839	27	13	72726828	6.1094	5e-10	9.64e-06
ZBTB7B	ENSG00000160685	1	154975127	154990998	60	33	72726828	6.1094	5e-10	9.64e-06
DCST2	ENSG00000163354	1	154990996	155006257	64	29	72726828	6.1094	5e-10	9.64e-06
DCST1	ENSG00000163357	1	155006300	155023406	67	30	72726828	6.1094	5e-10	9.64e-06
TRIM46	ENSG00000163462	1	155145873	155157447	40	23	72726828	6.1094	5e-10	9.64e-06
MAT2A	ENSG00000168906	2	85766288	85772403	22	14	72726828	6.1094	5e-10	9.64e-06
GGCX	ENSG00000115486	2	85771846	85788670	87	29	72726828	6.1094	5e-10	9.64e-06
VAMP5	ENSG00000168899	2	85811531	85820535	35	13	72726828	6.1094	5e-10	9.64e-06
SLC20A1	ENSG00000144136	2	113403434	113421404	71	24	72726828	6.1094	5e-10	9.64e-06
SEPT2	ENSG00000168385	2	242254515	242293442	235	60	72726828	6.1094	5e-10	9.64e-06
IP6K1	ENSG00000176095	3	49761727	49823975	225	46	72726828	6.1094	5e-10	9.64e-06
TRAIP	ENSG00000183763	3	49866034	49894007	87	25	72726828	6.1094	5e-10	9.64e-06
VGLL3	ENSG00000206538	3	86987119	87040269	249	47	72726828	6.1094	5e-10	9.64e-06
CHMP2B	ENSG00000083937	3	87276421	87304698	140	41	72726828	6.1094	5e-10	9.64e-06
SEC62	ENSG00000008952	3	169684423	169716161	109	22	72726828	6.1094	5e-10	9.64e-06
HIST1H2BN	ENSG00000233822	6	27806323	27823487	74	26	72726828	6.1094	5e-10	9.64e-06
CLIC1	ENSG00000213719	6	31698358	31707540	39	25	72726828	6.1094	5e-10	9.64e-06
MSH5-SAPCD1	ENSG00000255152	6	31707797	31732628	148	52	72726828	6.1094	5e-10	9.64e-06
LSM2	ENSG00000204392	6	31765173	31774761	55	28	72726828	6.1094	5e-10	9.64e-06
CYP21A2	ENSG00000231852	6	32006042	32009447	48	26	72726828	6.1094	5e-10	9.64e-06
ATF6B	ENSG00000213676	6	32065953	32096030	130	53	72726828	6.1094	5e-10	9.64e-06
PBX2	ENSG00000204304	6	32152512	32157963	23	12	72726828	6.1094	5e-10	9.64e-06
HLA-DMA	ENSG00000204257	6	32916390	32936871	154	41	72726828	6.1191	4.71e-10	9.07e-06
CEP57L1	ENSG00000183137	6	109416313	109485135	247	65	72726828	6.1094	5e-10	9.64e-06
GPRC6A	ENSG00000173612	6	117113248	117150200	208	46	72726828	6.1094	5e-10	9.64e-06
TAX1BP1	ENSG00000106052	7	27778950	27884183	448	60	72726828	6.1094	5e-10	9.64e-06
TRIM8	ENSG00000171206	10	104404253	104418164	48	25	72726828	6.1094	5e-10	9.64e-06
SFXN2	ENSG00000156398	10	104474295	104503249	127	45	72726828	6.1094	5e-10	9.64e-06
OBFC1	ENSG00000107960	10	105642300	105677963	174	30	72726828	6.1094	5e-10	9.64e-06
C1QL4	ENSG00000186897	12	49726200	49730971	31	15	72726828	6.1094	5e-10	9.64e-06
TTC6	ENSG00000139865	14	38065052	38510647	2165	158	72726828	6.1299	4.4e-10	8.48e-06
SIX1	ENSG00000126778	14	61110133	61124977	42	19	72726828	6.1094	5e-10	9.64e-06
ZBTB4	ENSG00000174282	17	7362685	7387582	136	35	72726828	6.1094	5e-10	9.64e-06
CHD3	ENSG00000170004	17	7788124	7816078	116	53	72726828	6.1094	5e-10	9.64e-06
SREBF1	ENSG00000072310	17	17713713	17740325	116	33	72726828	6.1094	5e-10	9.64e-06
NOSIP	ENSG00000142546	19	50058968	50093519	189	46	72726828	6.1094	5e-10	9.64e-06
KLK2	ENSG00000167751	19	51364824	51383823	171	35	72726828	6.1094	5e-10	9.64e-06
ARFRP1	ENSG00000101246	20	62329996	62339377	50	21	72726828	6.1094	5e-10	9.64e-06
ZGPAT	ENSG00000197114	20	62338817	62367494	188	34	72726828	6.1094	5e-10	9.64e-06
RP4-583P15.15	ENSG00000273154	20	62340216	62370456	196	33	72726828	6.1094	5e-10	9.64e-06
LIME1	ENSG00000203896	20	62366815	62370456	19	8	72726828	6.1094	5e-10	9.64e-06
MCAT	ENSG00000100294	22	43528212	43539400	65	29	72726828	6.1094	5e-10	9.64e-06
TSPO	ENSG00000100300	22	43547520	43559248	89	22	72726828	6.1094	5e-10	9.64e-06
TTLL12	ENSG00000100304	22	43562628	43583139	208	52	72726828	6.1094	5e-10	9.64e-06
HORMAD2	ENSG00000176635	22	30476163	30573064	372	49	72726828	6.1086	5.03e-10	9.69e-06
IGF1	ENSG00000017427	12	102789645	102874423	325	55	72726828	6.1032	5.2e-10	1e-05
PSORS1C1	ENSG00000204540	6	31082527	31107869	416	40	72726828	6.101	5.27e-10	1.02e-05
ALOX5	ENSG00000012779	10	45869661	45941561	471	73	72726828	6.0995	5.32e-10	1.03e-05
RP11-1099M24.7	ENSG00000262730	17	7829249	7833940	25	11	72726828	6.0922	5.57e-10	1.07e-05
HAUS8	ENSG00000131351	19	17160539	17186435	178	39	72726828	6.0901	5.64e-10	1.09e-05
ARHGEF38	ENSG00000236699	4	106473777	106629250	848	99	72726828	6.0877	5.73e-10	1.1e-05
CLDN11	ENSG00000013297	3	170136653	170578169	2477	175	72726828	6.0766	6.14e-10	1.18e-05
ZDHHC7	ENSG00000153786	16	85007787	85045141	311	41	72726828	6.0557	6.99e-10	1.35e-05
HOXB2	ENSG00000173917	17	46618256	46623441	23	10	72726828	6.053	7.11e-10	1.37e-05
C9orf78	ENSG00000136819	9	132589569	132598142	81	8	72726828	6.0378	7.81e-10	1.51e-05
IKZF2	ENSG00000030419	2	213864429	214017151	803	59	72726828	6.0169	8.89e-10	1.71e-05
BCL2L11	ENSG00000153094	2	111876955	111926024	207	50	72726828	5.9978	1e-09	1.93e-05
RHOA	ENSG00000067560	3	49396578	49450431	246	54	72726828	5.9978	1e-09	1.93e-05
BRD2	ENSG00000204256	6	32936437	32949282	167	51	72726828	5.9978	1e-09	1.93e-05
TAPBP	ENSG00000231925	6	33267471	33282164	69	23	72726828	5.9978	1e-09	1.93e-05
FAM162B	ENSG00000183807	6	117073363	117086886	76	25	72726828	5.9978	1e-09	1.93e-05
TIPIN	ENSG00000075131	15	66628544	66679084	262	43	72726828	5.9986	9.95e-10	1.92e-05
ZNF585B	ENSG00000245680	19	37672481	37709055	143	50	72726828	5.9978	1e-09	1.93e-05
CDKN2B	ENSG00000147883	9	22002902	22009362	24	14	72726828	5.9953	1.02e-09	1.96e-05
OLFML1	ENSG00000183801	11	7506619	7532608	176	33	72726828	5.9788	1.12e-09	2.17e-05
ZFP57	ENSG00000204644	6	29640169	29648887	98	19	72726828	5.9765	1.14e-09	2.2e-05
TNFSF13	ENSG00000161955	17	7461609	7464925	14	10	72726828	5.9664	1.21e-09	2.34e-05
TRAM1	ENSG00000067167	8	71485677	71520622	161	39	72726828	5.9572	1.28e-09	2.47e-05
SUPT4H1	ENSG00000213246	17	56422539	56430454	40	15	72726828	5.9572	1.28e-09	2.47e-05
TBX3	ENSG00000135111	12	115108059	115121969	76	33	72726828	5.9531	1.32e-09	2.54e-05
HLA-G	ENSG00000204632	6	29794744	29798902	85	10	72726828	5.9467	1.37e-09	2.64e-05
PDSS2	ENSG00000164494	6	107473761	107780768	1492	105	72726828	5.9383	1.44e-09	2.78e-05
LY6G6F	ENSG00000204424	6	31674640	31685581	61	26	72726828	5.934	1.48e-09	2.85e-05
LRRIQ4	ENSG00000188306	3	169539710	169555563	94	29	72726828	5.9052	1.76e-09	3.4e-05
ANKRD17	ENSG00000132466	4	73939093	74124515	482	108	72726828	5.8989	1.83e-09	3.53e-05
SETDB1	ENSG00000143379	1	150898739	150937213	161	50	72726828	5.8842	2e-09	3.86e-05
PGBD1	ENSG00000137338	6	28249314	28270326	114	33	72726828	5.8842	2e-09	3.86e-05
DDR1	ENSG00000204580	6	30844198	30867933	159	40	72726828	5.8842	2e-09	3.86e-05
ROGDI	ENSG00000067836	16	4846969	4852951	40	21	72726828	5.8842	2e-09	3.86e-05
SLC45A3	ENSG00000158715	1	205626979	205649587	118	44	72726828	5.8766	2.09e-09	4.04e-05
SMCO3	ENSG00000179256	12	14957584	14967116	48	20	72726828	5.86	2.31e-09	4.46e-05
LOXL2	ENSG00000134013	8	23154702	23282841	1231	82	72726828	5.8565	2.36e-09	4.56e-05
TH	ENSG00000180176	11	2185159	2193107	53	20	72726828	5.851	2.44e-09	4.71e-05
MRPL18	ENSG00000112110	6	160210844	160219468	73	12	72726828	5.8376	2.65e-09	5.11e-05
MEIS1	ENSG00000143995	2	66660584	66801001	609	88	72726828	5.8341	2.7e-09	5.21e-05
GNL1	ENSG00000204590	6	30509154	30524951	63	32	72726828	5.8221	2.91e-09	5.6e-05
HTR3A	ENSG00000166736	11	113845603	113861035	104	31	72726828	5.8168	3e-09	5.78e-05
BCL2L1	ENSG00000171552	20	30252255	30311792	197	38	72726828	5.8168	3e-09	5.78e-05
RAB25	ENSG00000132698	1	156030951	156040295	31	24	72726828	5.8125	3.08e-09	5.94e-05
SCUBE2	ENSG00000175356	11	9041071	9159661	617	93	72726828	5.7954	3.41e-09	6.57e-05
SPATS2	ENSG00000123352	12	49760367	49921205	641	56	72726828	5.7939	3.44e-09	6.63e-05
HOXB1	ENSG00000120094	17	46605888	46608359	10	4	72726828	5.7907	3.5e-09	6.76e-05
PRTG	ENSG00000166450	15	55903744	56035288	730	70	72726828	5.7807	3.72e-09	7.17e-05
RAI1	ENSG00000108557	17	17584787	17714767	585	90	72726828	5.7765	3.81e-09	7.35e-05
RBBP8NL	ENSG00000130701	20	60985293	61002589	154	51	72726828	5.7709	3.94e-09	7.6e-05
C3orf84	ENSG00000236980	3	49215065	49229291	55	26	72726828	5.7685	4e-09	7.71e-05
ABHD16A	ENSG00000204427	6	31654726	31671221	78	30	72726828	5.7685	4e-09	7.71e-05
RNMTL1	ENSG00000171861	17	685513	695749	48	16	72726828	5.7646	4.09e-09	7.89e-05
VARS2	ENSG00000137411	6	30876019	30894236	127	21	72726828	5.7582	4.25e-09	8.19e-05
DALRD3	ENSG00000178149	3	49052921	49059726	19	13	72726828	5.7515	4.42e-09	8.53e-05
HLA-DPA1	ENSG00000231389	6	33032346	33048552	435	16	72726828	5.7509	4.44e-09	8.56e-05
DFFA	ENSG00000160049	1	10516579	10532583	76	36	72726828	5.75	4.46e-09	8.6e-05
APITD1	ENSG00000175279	1	10490159	10512210	116	24	72726828	5.747	4.54e-09	8.76e-05
APITD1-CORT	ENSG00000251503	1	10490159	10512210	116	24	72726828	5.747	4.54e-09	8.76e-05
TUBB	ENSG00000196230	6	30687978	30693203	35	12	72726828	5.7385	4.78e-09	9.21e-05
MEX3A	ENSG00000254726	1	156041804	156051789	31	17	72726828	5.7377	4.8e-09	9.25e-05
CTSS	ENSG00000163131	1	150702672	150738433	126	28	72726828	5.7283	5.07e-09	9.78e-05
PRKCH	ENSG00000027075	14	61654277	62017694	2137	201	72726828	5.7217	5.27e-09	0.000101648
LAMB2	ENSG00000172037	3	49158547	49170551	34	25	72726828	5.7195	5.34e-09	0.000103011
CCDC53	ENSG00000120860	12	102406705	102455927	173	39	72726828	5.7193	5.35e-09	0.000103134
PRKAR2A	ENSG00000114302	3	48782030	48885279	276	91	72726828	5.709	5.68e-09	0.000109585
LMNA	ENSG00000160789	1	156052364	156109880	273	50	72726828	5.7007	5.97e-09	0.000115061
ZFP36L2	ENSG00000152518	2	43449541	43453748	25	16	72726828	5.6969	6.1e-09	0.000117637
ACTRT3	ENSG00000184378	3	169484709	169487683	20	8	72726828	5.6967	6.11e-09	0.000117737
SCGB1D1	ENSG00000168515	11	61957688	61961011	21	11	72726828	5.6932	6.23e-09	0.000120211
TNRC6B	ENSG00000100354	22	40440821	40731812	1240	78	72726828	5.6923	6.27e-09	0.000120863
PSMC6	ENSG00000100519	14	53173890	53195305	85	33	72726828	5.6902	6.35e-09	0.000122361
SEPT4	ENSG00000108387	17	56597611	56618179	73	26	72726828	5.6862	6.5e-09	0.000125255
TP53	ENSG00000141510	17	7565097	7590856	155	47	72726828	5.685	6.54e-09	0.000126134
SFTA2	ENSG00000196260	6	30899130	30899952	10	4	72726828	5.672	7.06e-09	0.000136101
MAP3K1	ENSG00000095015	5	56111401	56191979	428	48	72726828	5.6695	7.16e-09	0.000138098
CHD7	ENSG00000171316	8	61591337	61779465	844	60	72726828	5.6688	7.19e-09	0.000138607
FAM57A	ENSG00000167695	17	635652	646206	63	20	72726828	5.6649	7.35e-09	0.0001418
MYC	ENSG00000136997	8	128747680	128753674	36	20	72726828	5.6603	7.56e-09	0.000145707
HOXA13	ENSG00000106031	7	27233122	27239725	23	9	72726828	5.6546	7.81e-09	0.000150554
TPX2	ENSG00000088325	20	30327074	30389608	240	46	72726828	5.6505	8e-09	0.000154248
ADAMTSL4	ENSG00000143382	1	150521884	150533413	72	38	72726828	5.6302	9e-09	0.000173548
CYP17A1	ENSG00000148795	10	104590288	104597290	30	9	72726828	5.6308	8.97e-09	0.000172945
ZNF570	ENSG00000171827	19	37958487	37976260	58	23	72726828	5.6302	9e-09	0.000173529
CDHR4	ENSG00000187492	3	49828165	49837268	34	18	72726828	5.6261	9.22e-09	0.000177726
MYNN	ENSG00000085274	3	169490619	169507504	62	25	72726828	5.6236	9.35e-09	0.000180273
DNAJB8	ENSG00000179407	3	128181282	128186091	40	18	72726828	5.6211	9.49e-09	0.000182971
C10orf53	ENSG00000178645	10	50887697	50918307	217	37	72726828	5.612	1e-08	0.00019281
SKA2	ENSG00000182628	17	57187312	57232630	136	46	72726828	5.5955	1.1e-08	0.000212091
STK19	ENSG00000204344	6	31938868	31950598	67	29	72726828	5.5946	1.11e-08	0.000213171
HIST1H4L	ENSG00000198558	6	27840926	27841289	3	2	72726828	5.5917	1.12e-08	0.000216796
MICA	ENSG00000204520	6	31371356	31383092	258	35	72726828	5.5838	1.18e-08	0.00022686
NUP37	ENSG00000075188	12	102467967	102513902	211	56	72726828	5.5836	1.18e-08	0.000227092
SIX6	ENSG00000184302	14	60975669	60979568	20	11	72726828	5.563	1.33e-08	0.000255666
NSUN4	ENSG00000117481	1	46805849	46830824	247	10	72726828	5.5623	1.33e-08	0.000256649
MAD1L1	ENSG00000002822	7	1855429	2272878	3716	80	72726828	5.5562	1.38e-08	0.000265808
ZSCAN12	ENSG00000158691	6	28346732	28367511	114	24	72726828	5.5466	1.46e-08	0.000280808
KRT4	ENSG00000170477	12	53200333	53208335	43	19	72726828	5.5365	1.54e-08	0.00029739
HIST1H2AJ	ENSG00000182611	6	27782112	27782607	7	3	72726828	5.5348	1.56e-08	0.00030034
TNFRSF10A	ENSG00000104689	8	23047965	23082639	223	49	72726828	5.525	1.65e-08	0.000317616
BTN3A2	ENSG00000186470	6	26365387	26378546	138	18	72726828	5.5195	1.7e-08	0.000327796
SH3RF1	ENSG00000154447	4	170015407	170192256	834	69	72726828	5.5162	1.73e-08	0.000333928
HSPA1B	ENSG00000204388	6	31795512	31798031	11	7	72726828	5.5039	1.86e-08	0.000358164
OR12D3	ENSG00000112462	6	29341200	29343068	16	8	72726828	5.5028	1.87e-08	0.0003604
SPEM1	ENSG00000181323	17	7323679	7324951	9	6	72726828	5.5019	1.88e-08	0.000362136
TNFSF10	ENSG00000121858	3	172223298	172241297	114	26	72726828	5.4999	1.9e-08	0.000366339
PRR11	ENSG00000068489	17	57232860	57282066	196	49	72726828	5.4909	2e-08	0.00038562
GPX6	ENSG00000198704	6	28471073	28495992	140	39	72726828	5.4892	2.02e-08	0.000389206
GGN	ENSG00000179168	19	38874905	38878722	23	11	72726828	5.4882	2.03e-08	0.000391481
OR5R1	ENSG00000174942	11	56184734	56185708	11	5	72726828	5.484	2.08e-08	0.000400794
CORT	ENSG00000241563	1	10509776	10511959	7	4	72726828	5.4819	2.1e-08	0.000405614
KIF1B	ENSG00000054523	1	10270863	10441661	868	38	72726828	5.4775	2.16e-08	0.000415891
BTN2A1	ENSG00000112763	6	26458150	26476849	127	34	72726828	5.4727	2.22e-08	0.000427286
TEX14	ENSG00000121101	17	56634039	56769416	600	56	72726828	5.4639	2.33e-08	0.000448939
RNF123	ENSG00000164068	3	49726932	49758962	127	43	72726828	5.4586	2.4e-08	0.000462744
ZNF569	ENSG00000196437	19	37902057	37960177	232	58	72726828	5.4513	2.5e-08	0.000482025
ARMC2	ENSG00000118690	6	109169619	109295186	599	67	72726828	5.4412	2.65e-08	0.00051033
EFNA3	ENSG00000251246	1	155036224	155059283	75	31	72726828	5.4376	2.7e-08	0.000520587
C2	ENSG00000166278	6	31865562	31913449	257	54	72726828	5.4362	2.72e-08	0.000524597
PSMB7	ENSG00000136930	9	127115745	127177723	228	54	72726828	5.4311	2.8e-08	0.000539868
TTC16	ENSG00000167094	9	130478345	130493879	76	22	72726828	5.4311	2.8e-08	0.000539868
SYTL1	ENSG00000142765	1	27668513	27680421	47	19	72726828	5.4283	2.85e-08	0.000548583
RBM5	ENSG00000003756	3	50126341	50156454	79	31	72726828	5.4249	2.9e-08	0.000559149
SLC25A37	ENSG00000147454	8	23386318	23432976	399	43	72726828	5.4161	3.05e-08	0.000587261
HIST1H2BC	ENSG00000180596	6	26115101	26124154	73	24	72726828	5.4034	3.27e-08	0.00063045
TMEM102	ENSG00000181284	17	7338762	7340998	11	6	72726828	5.403	3.28e-08	0.000631742
ARHGAP23	ENSG00000225485	17	36584662	36668628	500	82	72726828	5.3997	3.34e-08	0.000643619
GDI2	ENSG00000057608	10	5807186	5884095	436	62	72726828	5.3885	3.55e-08	0.000684784
TOM1L2	ENSG00000175662	17	17746828	17875736	583	45	72726828	5.3825	3.67e-08	0.000707998
KLF5	ENSG00000102554	13	73629114	73651676	110	39	72726828	5.3751	3.83e-08	0.000737845
AGPAT3	ENSG00000160216	21	45285067	45406417	724	100	72726828	5.3742	3.85e-08	0.000741644
KIAA0513	ENSG00000135709	16	85061375	85127836	591	53	72726828	5.3731	3.87e-08	0.000746098
CLCNKB	ENSG00000184908	1	16370272	16383803	197	31	72726828	5.3714	3.91e-08	0.000753212
RP11-382J12.1	ENSG00000246366	8	71520812	71575514	271	31	72726828	5.3687	3.97e-08	0.000764684
TOR2A	ENSG00000160404	9	130493803	130497604	20	8	72726828	5.3646	4.06e-08	0.000782095
EXPH5	ENSG00000110723	11	108376158	108464465	487	80	72726828	5.3569	4.23e-08	0.000816261
MIER3	ENSG00000155545	5	56215429	56267502	299	42	72726828	5.3526	4.34e-08	0.00083587
NCK1	ENSG00000158092	3	136581050	136668665	392	30	72726828	5.3465	4.48e-08	0.000864406
COPZ2	ENSG00000005243	17	46103533	46115392	53	28	72726828	5.3362	4.75e-08	0.000915096
COX16	ENSG00000133983	14	70791798	70826448	204	42	72726828	5.3268	5e-08	0.000963722
RFC5	ENSG00000111445	12	118451393	118470935	107	33	72726828	5.3215	5.15e-08	0.000992297
FAM154A	ENSG00000155875	9	18927656	19033251	1072	53	72726828	5.3211	5.16e-08	0.000994244
APOM	ENSG00000204444	6	31620193	31625987	29	15	72726828	5.318	5.25e-08	0.00101169
KIFC1	ENSG00000237649	6	33359313	33377701	109	37	72726828	5.3138	5.37e-08	0.00103483
LRRC31	ENSG00000114248	3	169556967	169587718	173	42	72726828	5.3127	5.4e-08	0.00104117
HOXB7	ENSG00000260027	17	46684594	46710934	164	54	72726828	5.3108	5.46e-08	0.00105226
IPP	ENSG00000197429	1	46159996	46216322	261	28	72726828	5.3056	5.62e-08	0.00108294
CDKN2A	ENSG00000147889	9	21967751	21995300	106	41	72726828	5.2925	6.03e-08	0.00116317
ABT1	ENSG00000146109	6	26597180	26600278	20	8	72726828	5.2914	6.07e-08	0.00116991
SHROOM3	ENSG00000138771	4	77356253	77704406	1774	109	72726828	5.2833	6.34e-08	0.00122301
TIGD3	ENSG00000173825	11	65122238	65125084	8	5	72726828	5.2789	6.5e-08	0.00125307
RAB7L1	ENSG00000117280	1	205737114	205744588	46	17	72726828	5.2668	6.94e-08	0.00133824
TACC1	ENSG00000147526	8	38585704	38710546	537	62	72726828	5.2517	7.54e-08	0.00145292
FAF1	ENSG00000185104	1	50905150	51425935	1883	82	72726828	5.2506	7.58e-08	0.00146154
MOB2	ENSG00000182208	11	1490687	1522477	221	44	72726828	5.2477	7.7e-08	0.00148464
NKX2-6	ENSG00000180053	8	23559964	23564111	21	7	72726828	5.2422	7.94e-08	0.00152997
EFNA3	ENSG00000143590	1	155036224	155060014	77	31	72726828	5.2384	8.1e-08	0.00156176
MST1	ENSG00000173531	3	49721380	49726934	19	12	72726828	5.2355	8.23e-08	0.00158617
ASCL2	ENSG00000183734	11	2289725	2292182	15	8	72726828	5.2338	8.3e-08	0.00160061
GLYR1	ENSG00000140632	16	4853204	4897343	308	63	72726828	5.2278	8.58e-08	0.00165358
SETD9	ENSG00000155542	5	56205087	56221359	74	15	72726828	5.2259	8.66e-08	0.00167064
AP5B1	ENSG00000254470	11	65543364	65548273	23	14	72726828	5.2261	8.66e-08	0.00166891
HAX1	ENSG00000143575	1	154244987	154248351	14	10	72726828	5.2219	8.85e-08	0.00170728
HOXA11	ENSG00000005073	7	27221129	27224842	18	12	72726828	5.2217	8.87e-08	0.00170953
RP11-3B7.1	ENSG00000225399	3	49297518	49298744	8	5	72726828	5.2033	9.79e-08	0.00188767
PACSIN2	ENSG00000100266	22	43231418	43411151	1038	42	72726828	5.199	1e-07	0.00193176
BNIPL	ENSG00000163141	1	151009046	151020076	72	29	72726828	5.198	1.01e-07	0.00194237
LPCAT1	ENSG00000153395	5	1456595	1524092	537	94	72726828	5.1974	1.01e-07	0.00194873
FKBPL	ENSG00000204315	6	32096484	32098068	7	4	72726828	5.1927	1.04e-07	0.00199848
IRX4	ENSG00000113430	5	1877541	1887350	72	20	72726828	5.1916	1.04e-07	0.00200985
INHBB	ENSG00000163083	2	121103719	121109384	21	14	72726828	5.191	1.05e-07	0.00201679
ST5	ENSG00000166444	11	8714898	8932498	1193	98	72726828	5.1818	1.1e-07	0.0021186
RP11-111M22.2	ENSG00000179240	11	76092357	76125663	190	42	72726828	5.1785	1.12e-07	0.00215619
SIK2	ENSG00000170145	11	111473115	111601577	508	33	72726828	5.1751	1.14e-07	0.00219534
MMP14	ENSG00000157227	14	23305766	23318236	85	43	72726828	5.169	1.18e-07	0.00226841
PRR3	ENSG00000204576	6	30524663	30531500	44	21	72726828	5.1683	1.18e-07	0.00227766
AC110781.3	ENSG00000176349	7	1878222	1889567	124	23	72726828	5.1658	1.2e-07	0.00230755
SKAP1	ENSG00000141293	17	46210802	46507637	1208	61	72726828	5.1655	1.2e-07	0.00231237
AC119673.1	ENSG00000268313	1	205682497	205684153	4	2	72726828	5.1622	1.22e-07	0.00235267
ASB13	ENSG00000196372	10	5680830	5708558	274	66	72726828	5.1586	1.24e-07	0.00239914
C11orf65	ENSG00000166323	11	108179246	108338258	771	49	72726828	5.1548	1.27e-07	0.00244792
PRAC1	ENSG00000159182	17	46799084	46799884	5	3	72726828	5.1543	1.27e-07	0.00245409
ECM1	ENSG00000143369	1	150480538	150486265	24	12	72726828	5.1514	1.29e-07	0.00249207
HLA-DQA1	ENSG00000196735	6	32595956	32614839	1769	23	72726828	5.151	1.3e-07	0.00249766
KDM6B	ENSG00000132510	17	7743222	7758114	69	34	72726828	5.1465	1.33e-07	0.00255801
GABBR1	ENSG00000204681	6	29523406	29601753	592	66	72726828	5.1439	1.35e-07	0.00259445
CDH3	ENSG00000062038	16	68670092	68756519	558	53	72726828	5.1303	1.45e-07	0.00278919
RPS6KL1	ENSG00000198208	14	75370657	75390099	111	33	72726828	5.1288	1.46e-07	0.00281175
SFTA3	ENSG00000229415	14	36942493	36983034	197	53	72726828	5.1274	1.47e-07	0.00283161
WT1	ENSG00000184937	11	32409321	32457176	280	30	72726828	5.1227	1.51e-07	0.00290295
BTN2A2	ENSG00000124508	6	26383324	26395102	82	25	72726828	5.1188	1.54e-07	0.00296484
PRR12	ENSG00000126464	19	50094900	50129696	227	52	72726828	5.1173	1.55e-07	0.00298855
DAG1	ENSG00000173402	3	49506146	49573048	266	37	72726828	5.1105	1.61e-07	0.00309749
AMIGO3	ENSG00000176020	3	49754267	49761349	21	16	72726828	5.1027	1.67e-07	0.00322802
GMPPB	ENSG00000173540	3	49754277	49761384	21	16	72726828	5.1027	1.67e-07	0.00322802
MTMR3	ENSG00000100330	22	30279144	30426855	690	62	72726828	5.1004	1.7e-07	0.00326813
SMARCAD1	ENSG00000163104	4	95128762	95212443	409	40	72726828	5.0959	1.74e-07	0.0033468
RBM6	ENSG00000004534	3	49977440	50137478	613	45	72726828	5.0927	1.76e-07	0.00340271
IFT140	ENSG00000187535	16	1560428	1662111	772	63	72726828	5.0882	1.81e-07	0.00348504
HKR1	ENSG00000181666	19	37803739	37860267	280	41	72726828	5.0814	1.87e-07	0.00361114
HIST1H2AC	ENSG00000180573	6	26124373	26139344	119	38	72726828	5.0761	1.93e-07	0.00371391
HEXIM1	ENSG00000186834	17	43224684	43229468	21	13	72726828	5.0655	2.04e-07	0.00392658
AKIP1	ENSG00000166452	11	8932686	8941631	57	14	72726828	5.0611	2.08e-07	0.00401912
MMAB	ENSG00000139428	12	109991542	110011679	152	32	72726828	5.0472	2.24e-07	0.00432241
HIST1H3C	ENSG00000196532	6	26045639	26046097	4	2	72726828	5.0461	2.25e-07	0.00434671
DAXX	ENSG00000204209	6	33286335	33297046	48	21	72726828	5.0462	2.25e-07	0.00434497
QRICH1	ENSG00000198218	3	49067140	49131796	208	80	72726828	5.0349	2.39e-07	0.00460816
MYLK2	ENSG00000101306	20	30407111	30422492	79	20	72726828	5.0221	2.56e-07	0.00492707
CHSY1	ENSG00000131873	15	101715928	101792137	533	51	72726828	5.0145	2.66e-07	0.00512643
FAM208B	ENSG00000108021	10	5726801	5805703	429	53	72726828	5.0117	2.7e-07	0.00520009
GNPNAT1	ENSG00000100522	14	53241912	53258386	48	21	72726828	5.0088	2.74e-07	0.00527914
HSCB	ENSG00000100209	22	29138019	29153503	78	29	72726828	5.0025	2.83e-07	0.0054544
ZSCAN23	ENSG00000187987	6	28399707	28411279	68	22	72726828	4.9939	2.96e-07	0.00570428
TOMM7	ENSG00000196683	7	22852251	22862470	85	14	72726828	4.9891	3.03e-07	0.00584677
CCDC36	ENSG00000173421	3	49235861	49295537	220	63	72726828	4.9855	3.09e-07	0.00595783
LACTB2	ENSG00000147592	8	71547553	71581409	167	31	72726828	4.9763	3.24e-07	0.00624917
ARHGEF26	ENSG00000114790	3	153838792	153975616	645	56	72726828	4.9742	3.28e-07	0.00631472
CCDC17	ENSG00000159588	1	46085716	46089729	18	7	72726828	4.9713	3.32e-07	0.00641016
PLG	ENSG00000122194	6	161123270	161174347	325	45	72726828	4.9676	3.39e-07	0.00653375
RP11-201K10.3	ENSG00000273088	1	155141885	155159748	64	27	72726828	4.9642	3.45e-07	0.00665195
ENTPD6	ENSG00000197586	20	25176329	25207365	190	40	72726828	4.9575	3.57e-07	0.00688332
OSBPL5	ENSG00000021762	11	3108346	3187969	698	106	72726828	4.9492	3.73e-07	0.00718584
NKAPL	ENSG00000189134	6	28227098	28228736	11	7	72726828	4.9446	3.81e-07	0.00735397
SEMA6C	ENSG00000143434	1	151104161	151119104	92	29	72726828	4.9369	3.97e-07	0.0076507
WDR11	ENSG00000120008	10	122610687	122669036	373	29	72726828	4.9323	4.06e-07	0.00783291
RP11-12J10.3	ENSG00000258539	10	126305649	126480296	807	80	72726828	4.928	4.15e-07	0.0080074
ZNF641	ENSG00000167528	12	48733791	48745197	63	18	72726828	4.9268	4.18e-07	0.00805907
NCOA2	ENSG00000140396	8	71021997	71316040	1101	71	72726828	4.9236	4.25e-07	0.00818999
CDKN1B	ENSG00000111276	12	12867992	12875305	43	27	72726828	4.9222	4.28e-07	0.0082513
C10orf32	ENSG00000166275	10	104613980	104624718	43	17	72726828	4.9176	4.38e-07	0.0084445
FOXA1	ENSG00000129514	14	38059189	38069245	54	24	72726828	4.9168	4.4e-07	0.00847978
P4HTM	ENSG00000178467	3	49027319	49044587	46	26	72726828	4.9154	4.43e-07	0.00854148
TBC1D4	ENSG00000136111	13	75858808	76056250	994	132	72726828	4.9142	4.46e-07	0.00859451
PRUNE	ENSG00000143363	1	150980896	151008189	194	44	72726828	4.9123	4.5e-07	0.00867664
UBE4B	ENSG00000130939	1	10092890	10241297	704	57	72726828	4.9101	4.55e-07	0.00877459
RPH3AL	ENSG00000181031	17	62293	236045	1893	259	72726828	4.9103	4.55e-07	0.0087663
ZNF527	ENSG00000189164	19	37861963	37883968	77	28	72726828	4.8934	4.96e-07	0.00955682
RAD51C	ENSG00000108384	17	56769934	56811703	159	41	72726828	4.8874	5.11e-07	0.00984874
PRKRIR	ENSG00000137492	11	76061000	76092015	120	43	72726828	4.8866	5.13e-07	0.00989192
DNPH1	ENSG00000112667	6	43193367	43197222	17	11	72726828	4.8829	5.23e-07	0.0100761
LAMTOR2	ENSG00000116586	1	156024543	156028301	13	8	72726828	4.8804	5.29e-07	0.0102076
PRMT5	ENSG00000100462	14	23389720	23398794	37	13	72726828	4.874	5.47e-07	0.0105436
MPO	ENSG00000005381	17	56347217	56358296	50	36	72726828	4.8725	5.51e-07	0.0106258
RBP7	ENSG00000162444	1	10057264	10076078	86	21	72726828	4.8629	5.78e-07	0.0111529
B3GNT8	ENSG00000177191	19	41931264	41934635	17	8	72726828	4.858	5.93e-07	0.0114305
SLC27A3	ENSG00000143554	1	153746830	153752633	29	21	72726828	4.8565	5.97e-07	0.0115187
DNAJC5	ENSG00000101152	20	62526518	62567384	297	44	72726828	4.8518	6.12e-07	0.0117957
HORMAD1	ENSG00000143452	1	150670536	150693364	113	15	72726828	4.8509	6.14e-07	0.0118468
ZNF236	ENSG00000130856	18	74534563	74682683	783	58	72726828	4.8449	6.33e-07	0.0122114
RP11-145E5.5	ENSG00000264545	9	21802635	22032985	1320	130	72726828	4.8424	6.41e-07	0.0123661
KLK1	ENSG00000167748	19	51322404	51327043	39	15	72726828	4.8411	6.46e-07	0.0124465
SLC6A3	ENSG00000142319	5	1392909	1445545	412	86	72726828	4.837	6.59e-07	0.0127071
GPBP1L1	ENSG00000159592	1	46092976	46153785	280	26	72726828	4.834	6.69e-07	0.0129032
SAMD7	ENSG00000187033	3	169629360	169656963	165	40	72726828	4.8327	6.74e-07	0.0129873
TRAPPC3L	ENSG00000173626	6	116816152	116866773	264	35	72726828	4.8298	6.83e-07	0.0131757
TCTA	ENSG00000145022	3	49449639	49453908	18	9	72726828	4.8292	6.85e-07	0.0132131
SIM2	ENSG00000159263	21	38071433	38122218	317	97	72726828	4.8266	6.94e-07	0.0133881
RPUSD2	ENSG00000166133	15	40861499	40866659	30	17	72726828	4.8255	6.98e-07	0.0134645
HLA-DOA	ENSG00000204252	6	32971955	32977389	65	23	72726828	4.8245	7.02e-07	0.0135291
HMGCS1	ENSG00000112972	5	43289497	43313614	100	21	72726828	4.8226	7.09e-07	0.0136629
HFE	ENSG00000010704	6	26087509	26098571	58	27	72726828	4.8163	7.31e-07	0.0140961
SUGCT	ENSG00000175600	7	40174575	40900362	3237	189	72726828	4.8123	7.46e-07	0.0143827
DXO	ENSG00000204348	6	31937587	31940069	18	12	72726828	4.8116	7.49e-07	0.014433
FAAH	ENSG00000117480	1	46859937	46879520	91	40	72726828	4.8099	7.55e-07	0.0145572
MTMR4	ENSG00000108389	17	56566898	56595266	106	28	72726828	4.8077	7.63e-07	0.0147189
HLA-DMB	ENSG00000242574	6	32902406	32908847	71	16	72726828	4.8073	7.65e-07	0.0147517
PRC1	ENSG00000198901	15	91509270	91538859	185	35	72726828	4.8011	7.89e-07	0.0152127
IFT80	ENSG00000068885	3	159974774	160117668	509	72	72726828	4.7964	8.08e-07	0.0155708
NICN1	ENSG00000145029	3	49460379	49466759	17	9	72726828	4.7956	8.11e-07	0.0156325
SLC7A14	ENSG00000013293	3	170177372	170303863	655	98	72726828	4.792	8.25e-07	0.0159151
PITX1	ENSG00000069011	5	134363425	134370503	37	9	72726828	4.7925	8.24e-07	0.0158793
ZBTB9	ENSG00000213588	6	33422356	33425325	14	10	72726828	4.7921	8.25e-07	0.0159142
CDC42EP2	ENSG00000149798	11	65082289	65089900	33	20	72726828	4.7866	8.48e-07	0.0163497
ARFGAP3	ENSG00000242247	22	43192508	43254112	380	38	72726828	4.7844	8.57e-07	0.0165306
LRRC48	ENSG00000171962	17	17876127	17920203	191	40	72726828	4.783	8.63e-07	0.0166453
PWWP2A	ENSG00000170234	5	159488808	159546430	251	62	72726828	4.7778	8.86e-07	0.017083
RAB13	ENSG00000143545	1	153954127	153958834	14	10	72726828	4.776	8.94e-07	0.0172424
TRAK2	ENSG00000115993	2	202241930	202316302	283	40	72726828	4.7756	8.96e-07	0.0172735
BZRAP1	ENSG00000005379	17	56378592	56406152	135	35	72726828	4.7723	9.11e-07	0.0175588
SOX13	ENSG00000143842	1	204042243	204096863	325	85	72726828	4.7647	9.46e-07	0.0182348
CNNM2	ENSG00000148842	10	104678050	104849978	822	49	72726828	4.7642	9.48e-07	0.0182759
CRIM1	ENSG00000150938	2	36583069	36778278	1054	112	72726828	4.7634	9.52e-07	0.0183522
VPS45	ENSG00000136631	1	150039369	150117505	343	36	72726828	4.7553	9.91e-07	0.0191038
RP1-170O19.20	ENSG00000257184	7	27203154	27219632	65	32	72726828	4.7517	1.01e-06	0.0194507
MAP4K1	ENSG00000104814	19	39078281	39109522	187	50	72726828	4.7491	1.02e-06	0.0196936
IMPDH2	ENSG00000178035	3	49061758	49066841	13	10	72726828	4.748	1.03e-06	0.0198016
EFNA1	ENSG00000169242	1	155099936	155107333	34	18	72726828	4.7467	1.03e-06	0.0199346
CLIC6	ENSG00000159212	21	36041688	36090525	256	44	72726828	4.7457	1.04e-06	0.0200291
HAUS4	ENSG00000092036	14	23415437	23426370	52	17	72726828	4.7443	1.05e-06	0.0201679
GTF2A2	ENSG00000140307	15	59930261	59949740	130	25	72726828	4.7395	1.07e-06	0.0206557
TARS2	ENSG00000143374	1	150459887	150480078	121	24	72726828	4.7383	1.08e-06	0.0207753
EIF3E	ENSG00000104408	8	109213445	109447562	1324	55	72726828	4.7364	1.09e-06	0.0209758
OSBPL7	ENSG00000006025	17	45884738	45899200	79	20	72726828	4.7365	1.09e-06	0.0209604
MTERFD2	ENSG00000122085	2	242011584	242041747	177	44	72726828	4.7359	1.09e-06	0.021024
BNIP2	ENSG00000140299	15	59951345	59981733	235	22	72726828	4.7351	1.09e-06	0.0211031
RASSF6	ENSG00000169435	4	74437267	74486348	239	31	72726828	4.7341	1.1e-06	0.021213
TMEM72	ENSG00000187783	10	45406648	45432450	159	40	72726828	4.733	1.11e-06	0.0213286
GNAT1	ENSG00000114349	3	50229045	50233949	13	9	72726828	4.7306	1.12e-06	0.0215812
CFLAR	ENSG00000003402	2	201980827	202041410	267	34	72726828	4.7278	1.13e-06	0.021882
ATP6V1G2	ENSG00000213760	6	31512239	31516204	22	12	72726828	4.7274	1.14e-06	0.0219186
HLA-C	ENSG00000204525	6	31236526	31239907	224	23	72726828	4.7254	1.15e-06	0.0221365
LCTL	ENSG00000188501	15	66839517	66858317	88	27	72726828	4.7228	1.16e-06	0.0224257
CLCNKA	ENSG00000186510	1	16345370	16360545	156	32	72726828	4.7217	1.17e-06	0.0225433
GABPB2	ENSG00000143458	1	151043054	151098018	295	45	72726828	4.7215	1.17e-06	0.0225723
RAD51	ENSG00000051180	15	40986972	41024354	170	35	72726828	4.7217	1.17e-06	0.0225511
CASP10	ENSG00000003400	2	202047604	202094129	156	37	72726828	4.7186	1.19e-06	0.0228943
GRB10	ENSG00000106070	7	50657760	50861159	1163	73	72726828	4.7168	1.2e-06	0.0231006
SLC39A13	ENSG00000165915	11	47428683	47438047	51	20	72726828	4.709	1.24e-06	0.0239991
TBC1D5	ENSG00000131374	3	17198654	18486309	6073	142	72726828	4.7077	1.25e-06	0.0241514
RFX3	ENSG00000080298	9	3218297	3526004	1889	109	72726828	4.7077	1.25e-06	0.0241552
TBPL1	ENSG00000028839	6	134273308	134311570	212	34	72726828	4.7058	1.26e-06	0.024377
NDUFS4	ENSG00000164258	5	52856463	52979168	626	48	72726828	4.7038	1.28e-06	0.0246161
PLEKHO1	ENSG00000023902	1	150121373	150136916	85	28	72726828	4.7014	1.29e-06	0.0249053
WDR46	ENSG00000227057	6	33246885	33257304	62	27	72726828	4.7006	1.3e-06	0.0250094
TRIM59	ENSG00000213186	3	160150233	160203561	246	56	72726828	4.6985	1.31e-06	0.0252658
CTD-2510F5.6	ENSG00000265303	17	57274927	57292587	76	26	72726828	4.6963	1.32e-06	0.0255377
GSK3A	ENSG00000105723	19	42734338	42746777	42	21	72726828	4.695	1.33e-06	0.0257016
MICB	ENSG00000204516	6	31462658	31478901	267	25	72726828	4.6939	1.34e-06	0.0258365
MOCS3	ENSG00000124217	20	49575363	49577820	12	9	72726828	4.694	1.34e-06	0.0258327
STPG1	ENSG00000001460	1	24683489	24743424	319	43	72726828	4.6925	1.35e-06	0.0260139
FAM53B	ENSG00000189319	10	126307861	126432838	581	68	72726828	4.6916	1.36e-06	0.0261373
DDN	ENSG00000181418	12	49388932	49393092	11	6	72726828	4.6834	1.41e-06	0.0272055
C10orf32-ASMT	ENSG00000270316	10	104614029	104661656	242	38	72726828	4.6801	1.43e-06	0.0276451
RAPSN	ENSG00000165917	11	47459308	47470730	68	20	72726828	4.68	1.43e-06	0.0276605
UBE3A	ENSG00000114062	15	25582381	25684128	456	51	72726828	4.6801	1.43e-06	0.0276412
GDF5	ENSG00000125965	20	34021145	34042568	73	26	72726828	4.676	1.46e-06	0.0282062
TMEM106C	ENSG00000134291	12	48357352	48362661	29	14	72726828	4.6714	1.5e-06	0.0288463
RBM23	ENSG00000100461	14	23369854	23388393	115	29	72726828	4.6697	1.51e-06	0.0290815
ERF	ENSG00000105722	19	42751724	42759309	34	16	72726828	4.6675	1.52e-06	0.0293977
MNAT1	ENSG00000020426	14	61201460	61436671	844	59	72726828	4.6592	1.59e-06	0.0306067
ATPAF2	ENSG00000171953	17	17880723	17942523	246	46	72726828	4.6574	1.6e-06	0.030865
TRIM27	ENSG00000204713	6	28870779	28891766	127	38	72726828	4.6568	1.61e-06	0.0309537
MLK4	ENSG00000143674	1	233463514	233520894	389	56	72726828	4.6559	1.61e-06	0.0311041
ANKRD44	ENSG00000065413	2	197831741	198175897	1749	122	72726828	4.6561	1.61e-06	0.0310636
SLC44A4	ENSG00000204385	6	31830969	31846823	107	29	72726828	4.6536	1.63e-06	0.0314531
KDELR3	ENSG00000100196	22	38864067	38879452	94	47	72726828	4.6524	1.64e-06	0.0316286
ZFYVE21	ENSG00000100711	14	104182067	104200005	106	41	72726828	4.645	1.7e-06	0.0327912
ATAT1	ENSG00000137343	6	30594619	30614600	124	38	72726828	4.6438	1.71e-06	0.0329724
C2orf43	ENSG00000118961	2	20883788	21022882	710	79	72726828	4.6435	1.71e-06	0.0330226
ZNF383	ENSG00000188283	19	37708828	37734828	90	33	72726828	4.6425	1.72e-06	0.0331865
CORO7	ENSG00000262246	16	4404543	4475706	399	60	72726828	4.641	1.73e-06	0.0334217
CDSN	ENSG00000204539	6	31082867	31088223	95	13	72726828	4.6398	1.74e-06	0.0336241
PLIN2	ENSG00000147872	9	19108373	19149288	274	62	72726828	4.6297	1.83e-06	0.0353054
STRADB	ENSG00000082146	2	202252581	202345569	335	50	72726828	4.6277	1.85e-06	0.035639
MAPK8IP3	ENSG00000138834	16	1756184	1820318	480	79	72726828	4.6234	1.89e-06	0.0363871
HIST1H2BL	ENSG00000185130	6	27775257	27775709	3	1	72726828	4.6129	1.99e-06	0.0382901
MON1A	ENSG00000164077	3	49946302	49967606	54	24	72726828	4.6122	1.99e-06	0.0384174
CHAT	ENSG00000070748	10	50817141	50901925	507	94	72726828	4.6104	2.01e-06	0.0387375
WSB2	ENSG00000176871	12	118470712	118500235	159	33	72726828	4.6106	2.01e-06	0.0387008
TRIM39-RPP21	ENSG00000248167	6	30297359	30314631	120	30	72726828	4.6074	2.04e-06	0.039314
TMCC1	ENSG00000172765	3	129366635	129612419	799	73	72726828	4.6058	2.05e-06	0.039609
MRPS21	ENSG00000187145	1	150266289	150281414	89	18	72726828	4.6018	2.09e-06	0.0403725
USP4	ENSG00000114316	3	49315264	49378145	220	64	72726828	4.6005	2.11e-06	0.0406328
PPP1CC	ENSG00000186298	12	111157485	111180744	107	32	72726828	4.6003	2.11e-06	0.0406733
ABHD12	ENSG00000100997	20	25275379	25371619	535	39	72726828	4.5971	2.14e-06	0.041298
CORO7-PAM16	ENSG00000103426	16	4390252	4470495	444	70	72726828	4.5955	2.16e-06	0.0416277
RASSF4	ENSG00000107551	10	45454855	45491339	195	50	72726828	4.5931	2.18e-06	0.0420981
MAPRE1	ENSG00000101367	20	31407699	31438211	158	52	72726828	4.59	2.22e-06	0.0427228
XXbac-BPG181M17.5	ENSG00000248993	6	32905141	32920899	151	25	72726828	4.5892	2.23e-06	0.0429041
KLHDC8B	ENSG00000185909	3	49209044	49213917	15	7	72726828	4.5795	2.33e-06	0.0449402
OLFML3	ENSG00000116774	1	114522063	114524876	11	8	72726828	4.5737	2.4e-06	0.0461896
ABCF1	ENSG00000204574	6	30539153	30564956	156	35	72726828	4.5735	2.4e-06	0.0462339
IGFBP6	ENSG00000167779	12	53491220	53496129	21	15	72726828	4.574	2.39e-06	0.0461202
INTS4	ENSG00000149262	11	77589766	77705724	611	43	72726828	4.5728	2.41e-06	0.0463862
GINS1	ENSG00000101003	20	25388363	25433264	268	32	72726828	4.573	2.4e-06	0.0463419
NCR3	ENSG00000204475	6	31556672	31560762	34	18	72726828	4.5717	2.42e-06	0.0466465
C3orf27	ENSG00000198685	3	128290843	128294929	41	19	72726828	4.5624	2.53e-06	0.048752
RAPGEF4	ENSG00000091428	2	173600002	173917621	1630	137	72726828	4.5587	2.57e-06	0.0496254

## Sheet: Table S5
Table S5. Overlapping genes between GCTA-fastBAT and TWAS analyses
Gene	Chr	Start	End	NSNPS	TopSNP	Pvalue
ABCG5	2	43893114	43919462	195	rs28514770	3.19133e-13
ABCG8	2	43919606	43959109	192	rs12712893	6.95557e-09
ALS2CR11	2	202060393	202192146	174	rs6735656	6.86436e-16
ALS2CR12	2	201861391	201930346	68	rs13015798	1.69053e-07
ANKRD17	4	74159365	74343366	156	rs35508161	1.06851e-12
ASCC2	22	28514600	28564254	84	rs62237573	0.00174863
ATP6V1C2	2	10779225	10842687	125	rs1990613	6.30419e-25
B3GNT2	2	62276765	62305370	74	rs13394374	0.0102713
BIK	22	41836700	41855662	56	rs202626	0.000191329
CASP10	2	201755865	201802355	97	rs4035021	0.000125481
CASP8	2	201806410	201860679	62	rs13015798	7.29909e-06
CFLAR	2	201689060	201737248	122	rs4035021	0.000177083
COPS8	2	237658822	237672228	156	rs72975178	0.0213795
CXCL1	4	74953972	74955817	45	rs35833948	0.0406248
DTYMK	2	242263829	242274900	57	rs116154780	3.8953e-33
EHBP1	2	62786636	63127125	296	rs2539982	1.87857e-77
FAM126B	2	201552031	201644637	219	rs77083322	0.000509012
GGCX	2	85629713	85642090	149	rs72838574	1.60324e-05
HAAO	2	42847732	42873255	102	rs6544580	9.22275e-09
HDLBP	2	241815351	241903927	229	rs111503962	2.10693e-06
HORMAD2	22	28806452	28903062	102	rs12165880	2.27266e-05
MCAT	22	41858155	41869347	56	rs202626	7.40865e-05
MDH1	2	63669625	63687832	64	rs72821624	9.48563e-42
MLPH	2	238060616	238128700	123	rs4433952	0.0388553
MTA3	2	42649174	42789857	202	rs6757452	1.44721e-09
NDUFB3	2	201644706	201658718	99	rs77083322	8.15134e-05
NOL10	2	10628344	10747563	294	rs1990613	2.55013e-26
OTX1	2	63131468	63137816	58	rs2430386	1.92671e-83
OXER1	2	42843142	42844905	87	rs6544580	8.2161e-09
PACSIN2	22	41596880	41672991	102	rs73885772	0.000195161
PDK1	2	173129024	173172108	187	rs80299051	0.000615559
PLEKHH2	2	43717950	43848630	210	rs1038822	1.70061e-28
POLI	18	50049846	50078602	134	rs1787122	0.0245119
PPA2	4	106509682	106614676	164	rs17617811	4.20825e-11
RASSF6	4	74657725	74705204	123	rs150742485	0.00151667
RNF181	2	85676347	85678342	155	rs11680227	1.37034e-13
SEPT2	2	241903395	241942114	185	rs115463731	1.43228e-07
SETD7	4	140646641	140697027	242	rs3796633	0.0284527
TBX1	22	18124225	18151112	115	rs5992802	0.000509074
TET2	4	106287391	106420407	171	rs142024729	9.33613e-47
TRAK2	2	201950174	202024564	103	rs6712872	7.75662e-09
TSPO	22	41877478	41889192	61	rs202626	8.12781e-05
UGP2	2	63921601	63972200	104	rs62177961	4.19508e-37
USP39	2	85696793	85729917	179	rs6743030	1.29541e-30
VAMP8	2	85658158	85662667	154	rs11680227	3.82461e-12
ZFP36L2	2	43303044	43307249	182	rs9678141	0.000648306

## Sheet: Table S6
Table S6. The results of Summary Mendelian randomization analysis
probeID	ProbeChr	Gene	PANEL	Probe_bp	topSNP	topSNP_chr	topSNP_bp	A1	A2	Freq	b_GWAS	se_GWAS	p_GWAS	b_eQTL	se_eQTL	p_eQTL	b_SMR	se_SMR	p_SMR	p_SMR_multi	p_HEIDI	nsnp_HEIDI
ENSG00000115648	2	MLPH	Testis	238429016	rs7582964	2	238385766	C	T	0.126243	0.0753	0.0079	1.54809e-21	0.41728	0.0643915	9.15052e-11	0.180454	0.0336726	8.36453e-08	8.36453e-08	0.0560244	15
ENSG00000100290	22	BIK	Thyroid	43110748	rs12168319	22	43108550	T	G	0.120672	-0.142	0.0088	1.41644e-58	-0.63856	0.0539397	2.47092e-32	0.222375	0.0232973	1.35949e-21	1.06534e-20	0.00033841	20
ENSG00000064012	2	CASP8	Heart_Atrial_Appendage	201233443	rs2080304	2	201321699	C	G	0.642512	0.0364	0.0057	1.7032e-10	0.318834	0.0443188	6.28755e-13	0.114166	0.023905	1.78972e-06	1.78972e-06	0.0992894	20
ENSG00000115677	2	HDLBP	Nerve_Tibial	241227264	rs73018185	2	241302291	T	C	0.190657	-0.0298	0.007	2.07056e-05	-0.482697	0.0323372	2.43592e-45	0.0617365	0.0151456	4.57794e-05	0.000448302	3.24322e-16	20
ENSG00000152256	2	PDK1	Muscle_Skeletal	172555373	rs6710129	2	172588026	C	T	0.190979	-0.061	0.0072	2.40755e-17	-0.414346	0.0352927	7.92352e-32	0.14722	0.0214289	6.41302e-12	1.46981e-14	1.66541e-15	20
ENSG00000138777	4	PPA2	Whole_Blood	105369077	rs1077526	4	105425999	A	G	0.1617	0.0432	0.0074	5.28826e-09	0.244357	0.0285932	1.27463e-17	0.176791	0.0366749	1.43213e-06	1.43213e-06	3.56609e-07	20
ENSG00000115486	2	GGCX	Adrenal_Gland	85545281	rs2044474	2	85531667	A	G	0.424542	-0.0732	0.0055	2.0496e-40	0.261407	0.0469171	2.52305e-08	-0.280023	0.0544847	2.75498e-07	2.75498e-07	0.389766	20

## Sheet: Table S7
Table S7. Bayesian colocalization identified 2 candidate genes
Gene symbole	PANEL	topSNP	PP.H0	PP.H1	PP.H2	PP.H3	PP.H4
MLPH	Testis	rs7582964	1.73967e-21	1.42351e-18	0.000874696	0.184	0.761
CASP8	Heart_Atrial_Appendage	rs3185378	1.61049e-15	5.29181e-09	2.98028e-07	0.979251	0.0207485
GGCX	Adrenal_Gland	rs67430030	2.15866e-61	3.29181e-22	0.014	0.018	0.968

## Sheet: Table S8
Table S8. The functional pathway analysis of MLPH-related genemania
Function	FDR	Genes in network	Genes in genome
pigment granule	4.50472e-07	5	24
transprot vesicle	4.50472e-07	8	225
establishment of melanosome localization	1.2859e-05	4	19
regulation of exocytosis	1.2859e-05	6	125
establishment of pigment granule localization	1.2859e-05	4	20
melanosome localization	1.2859e-05	4	20
pigment granule transport	1.2859e-05	4	19
cortical cytoskeleton	1.36944e-05	5	63
pigment granule localization	1.50794e-05	4	22
cellular pigmentation	0.000297776	4	46
cell cortex	0.000402672	5	131
pigmentation	0.000785374	4	61
positive regulation of secretion by cell	0.00312726	5	205
positive regulation of secretion	0.00366815	5	215
establishment of vesicle localization	0.0521997	4	185
vesicle localization	0.0600918	4	195
