# Supplementary material for: Integrative Genomic Profiling Identifies MLPH as a Candidate Gene in Prostate Cancer
Source: Research Square preprint supplement (doi:10.21203/rs.3.rs-7662167/v1), 2025-10-30
Supplement: Supplementary file 2 [file 8849ceb401f2864585a9bb24.docx]

**Supplementary Figure 1. Tissue and pathway enrichment results based on MAGMA gene-level associations**


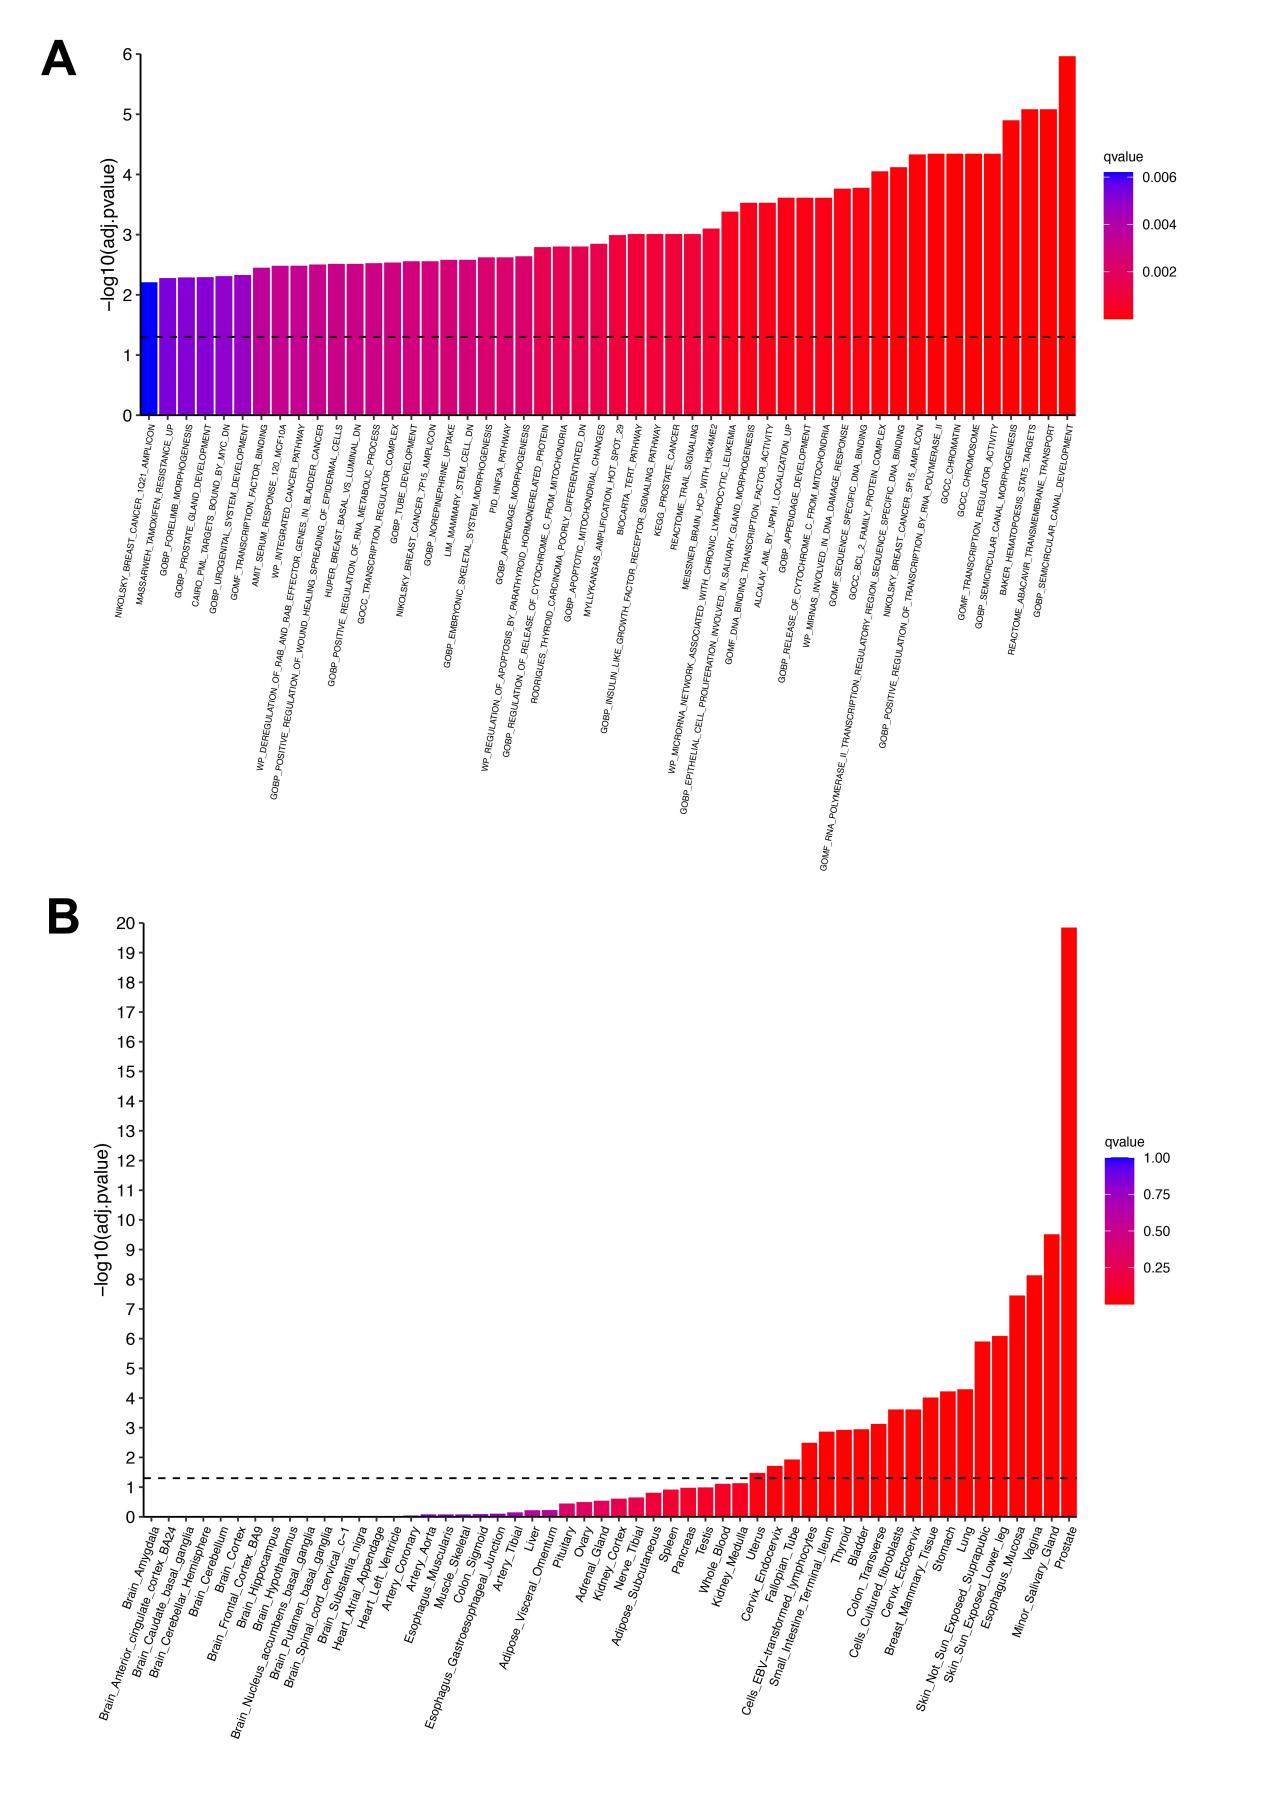


Abbreviations: MAGMA, Multi-marker Analysis of Genomic Annotation.

**Supplementary Figure 2. Colocalization plots for SMR-significant genes without evidence of colocalization**


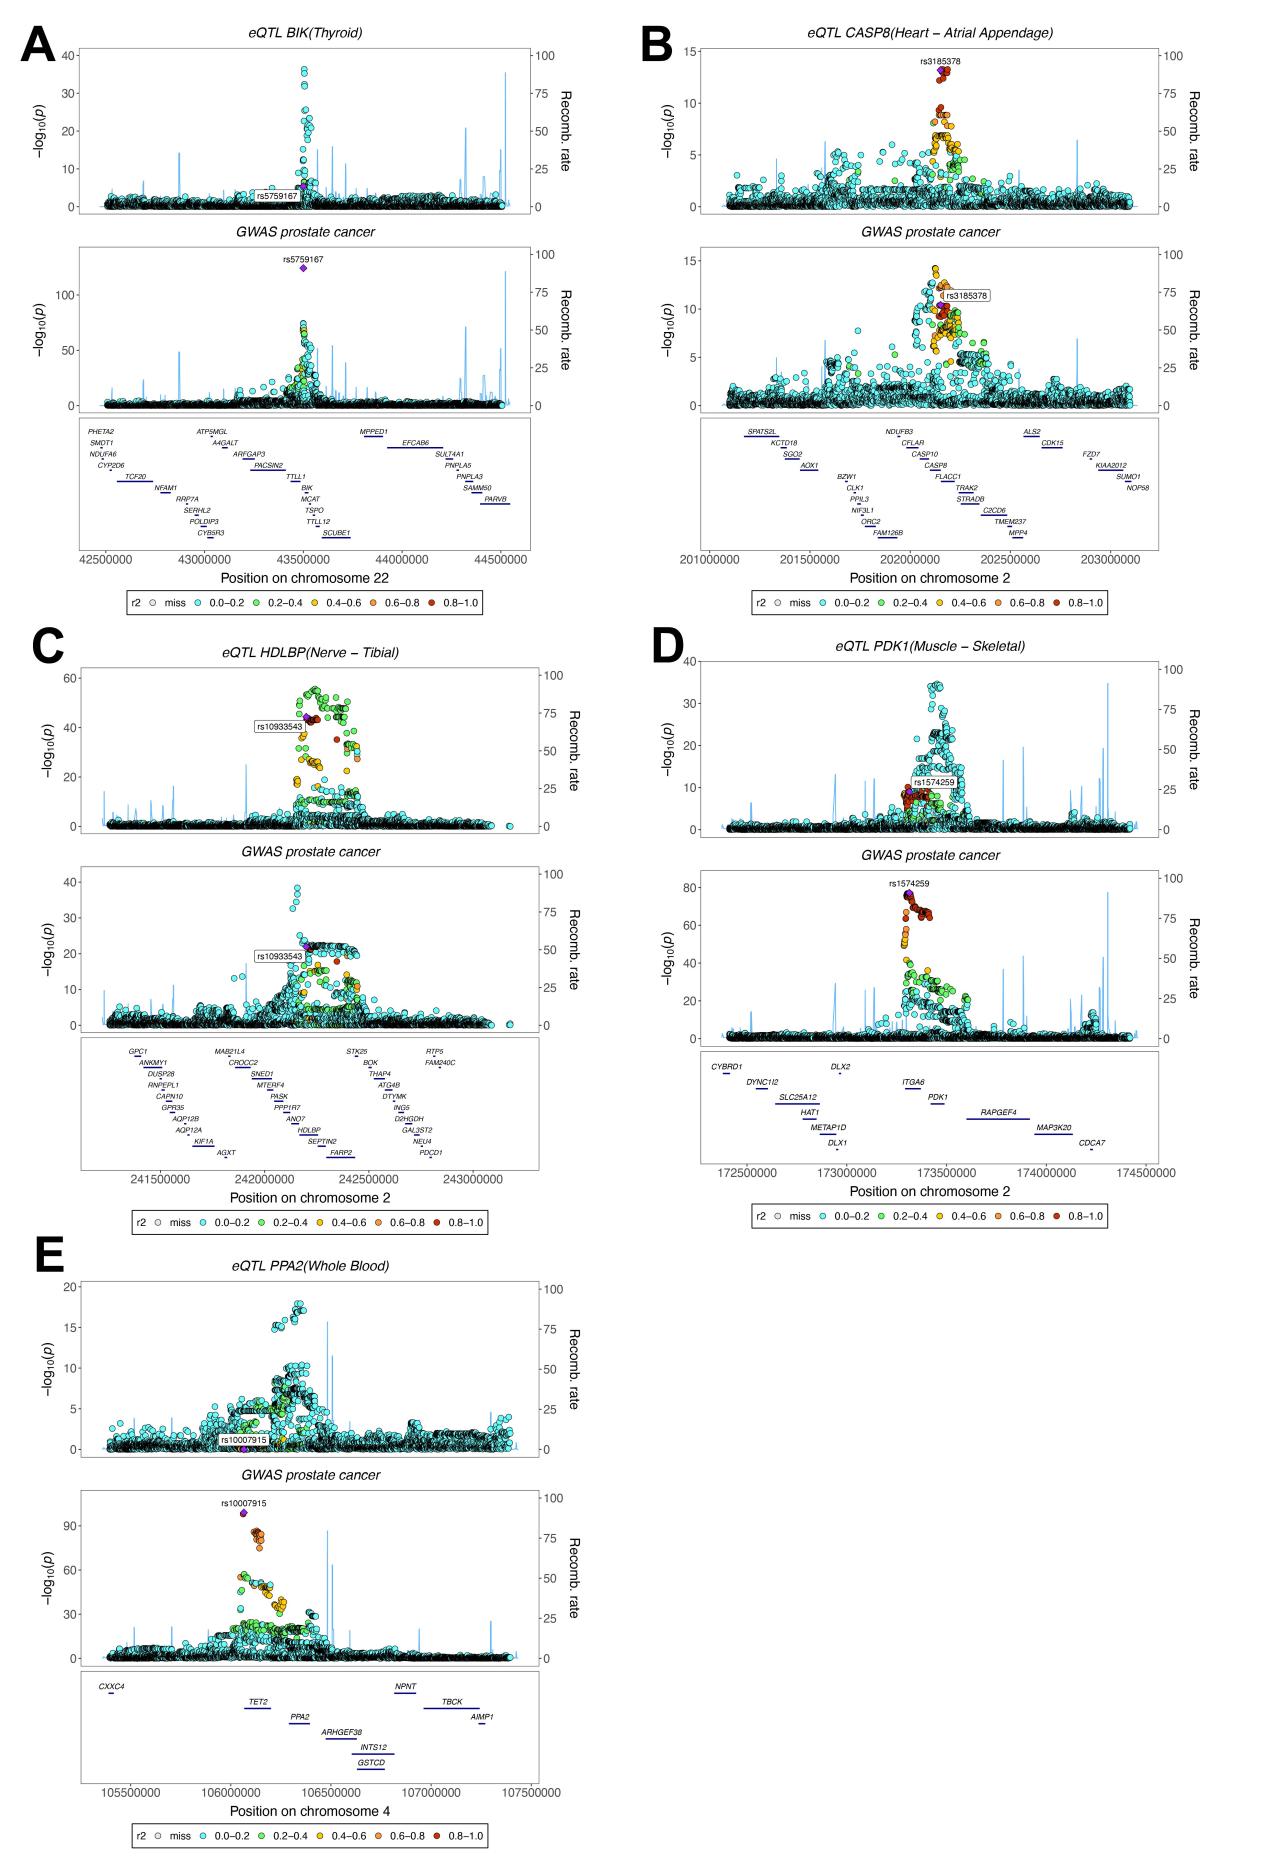


Abbreviations: GWAS, genome-wide association studies; eQTL, expression quantitative trait loci.
